# Supplementary material for: Design, synthesis, and biological evaluation of multiple F-18 S1PR1 radiotracers in rodent and nonhuman primate
Source: Royal Society of Chemistry journal article supplement (doi:10.1039/d4ob00712c), 2024-01-01
Supplement: d4ob00712c1.pdf [file d4ob00712c1.pdf]

*Electronic Supplementary Information*

## **Design, synthesis, and biological evaluation of multiple F-18 S1PR1 radiotracers in rodent and nonhuman primate**

Lin Qiu,<sup>a</sup> Hao Jiang,<sup>a</sup> Charles Zhou,<sup>a</sup> Vijai Kumar Reddy Tangadanchu,<sup>a</sup> Jinzhi Wang,<sup>a</sup> Tianyu Huang,<sup>a</sup> Robert J. Gropler,<sup>a</sup> Joel S. Perlmutter,<sup>a, b</sup> Tammie L. S. Benzinger,<sup>a</sup> and Zhude Tu<sup>a, \*</sup>

<sup>a</sup> *Department of Radiology, Washington University School of Medicine, Saint Louis, Missouri, 63110, United States.*

<sup>b</sup> *Department of Neurology, Radiology, Neuroscience, Physical Therapy and Occupational Therapy, Washington University School of Medicine, Saint Louis, Missouri, 63110, United States.*

\*Address correspondence to:

Zhude Tu, Ph.D.  
Department of Radiology  
Washington University School of Medicine  
Campus Box 8225  
510 S. Kingshighway Blvd.  
St. Louis, MO 63110, USA  
Tel: 1-314-362-8487  
Fax: 1-314-362-8555  
E-mail: [zhudetu@wustl.edu](mailto:zhudetu@wustl.edu)

## Contents

|                                                                                                                                                             |     |
|-------------------------------------------------------------------------------------------------------------------------------------------------------------|-----|
| 1. The total brain uptakes of [ <sup>18</sup> F]FS1P1, [ <sup>18</sup> F]TZ4877, [ <sup>18</sup> F]7c, [ <sup>18</sup> F]7d, and [ <sup>18</sup> F]15b..... | S3  |
| 2. Synthesis scheme of 22c, 23c, 24a, and 24b .....                                                                                                         | S3  |
| 3. Confirmation the radioactive intermediates of making [ <sup>18</sup> F]FS1P1.....                                                                        | S4  |
| 4. HPLC Radioactive chromatograms of radioactive compounds.....                                                                                             | S5  |
| 5. NMR data of compounds 6d, 22c, 23c, 24a, and 24b .....                                                                                                   | S17 |
| 6. NMR spectra of new compounds.....                                                                                                                        | S19 |

## 1. The brain time tissue activity curves (SUV) of [<sup>18</sup>F]FS1P1, [<sup>18</sup>F]TZ4877, [<sup>18</sup>F]7c, [<sup>18</sup>F]7d, and [<sup>18</sup>F]15b

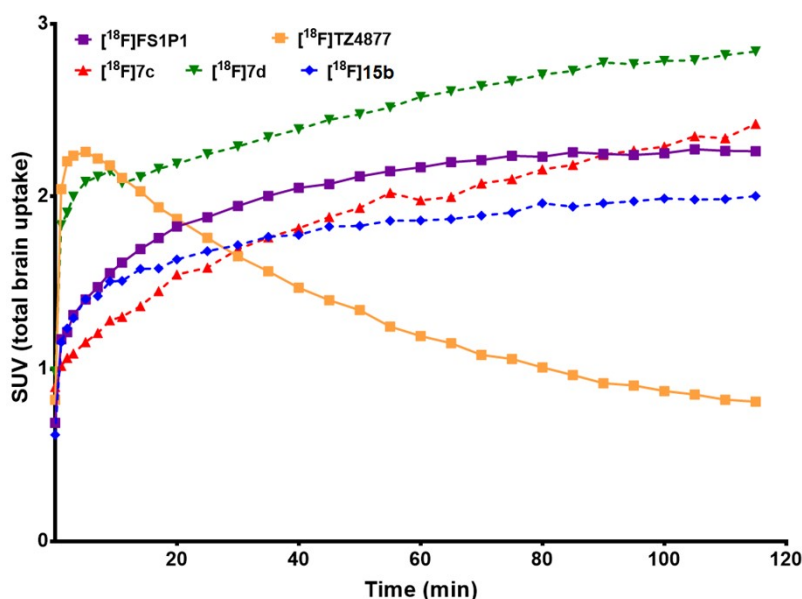

Figure S1. The brain time-activity curves of [<sup>18</sup>F]FS1P1, and [<sup>18</sup>F]TZ4877, [<sup>18</sup>F]7c, [<sup>18</sup>F]7d, and [<sup>18</sup>F]15b in macaques.

## 2. Synthesis scheme of 22c, 23c, 24a, and 24b

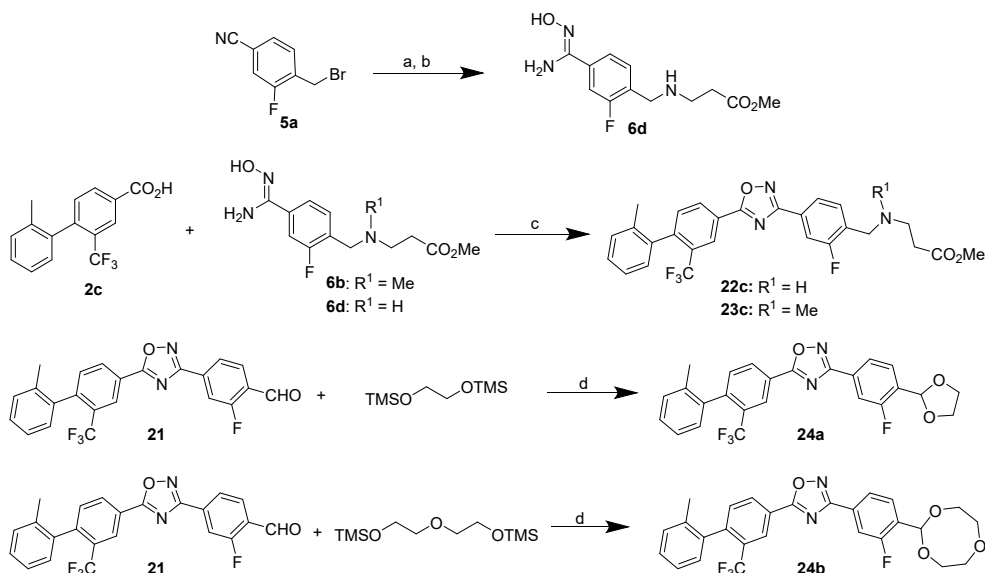

Scheme S1. Synthesis of 22c, 23c, 24a, and 24b. Reagents and conditions: (a) methyl 3-aminopropionate hydrochloride, Et<sub>3</sub>N, MeOH, RT; (b) NH<sub>2</sub>OH·HCl, NaHCO<sub>3</sub>, MeOH, reflux; (c) EDCI, HOBT, DMF, RT to 120 °C; (d) FeCl<sub>3</sub>, MeCN, reflux, 0.5 h.

### 3. Confirmation of the radioactive intermediates in making [<sup>18</sup>F]FS1P1

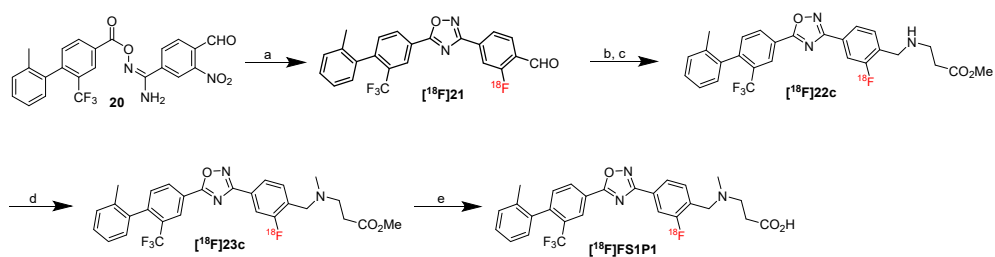

**Scheme S2.** Radiosynthesis of [<sup>18</sup>F]FS1P1, reagents and conditions: (a) [<sup>18</sup>F]KF, Kryptofix 222, TMEDA, DMSO/H<sub>2</sub>O, 150 °C, 5 min; (b) methyl 3-aminopropionate hydrochloride, TMEDA, AcOH, EtOH, 100 °C, 5 min; (c) NaCNBH<sub>3</sub>, RT, 2 min; (d) formalin, 100 °C, 5 min, then NaCNBH<sub>3</sub>, RT, 2 min; (e) NaOH (5 M), 100 °C, 5 min, then AcOH for neutralization.

#### 4. HPLC Radioactive chromatograms of radioactive compounds.

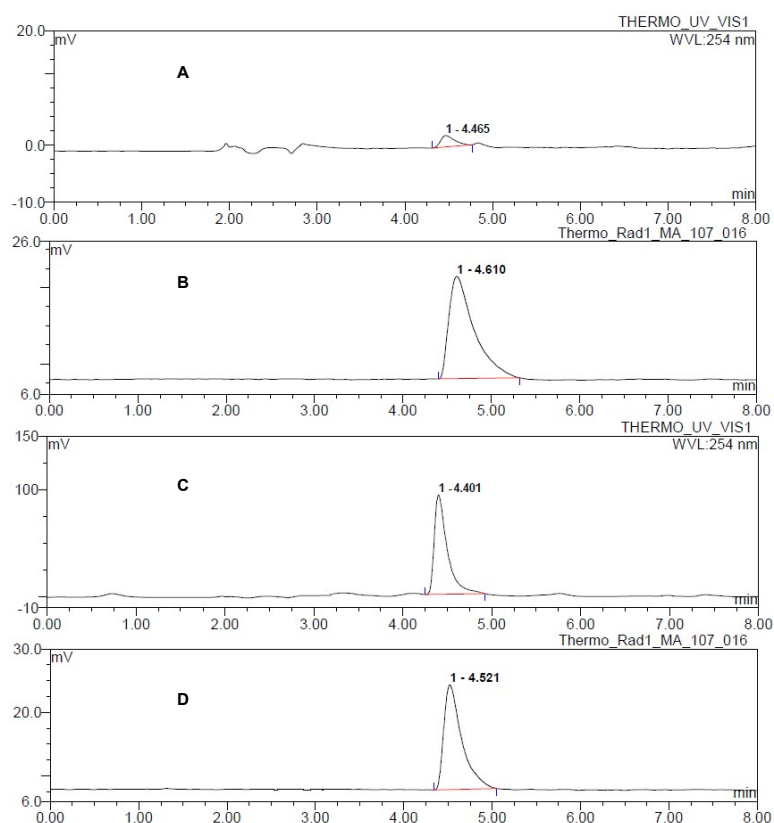

**Figure S2.** HPLC analysis of final radioactive dose [ $^{18}\text{F}$ ]**7c**. Analytical HPLC conditions: Phenomenex prodigy analytic column ( $250 \times 4.6$  mm,  $5 \mu\text{m}$ ), mobile phase 70% acetonitrile in 0.1 M ammonium formate, pH 4.5, flow rate 1.0 mL/min, detection wavelength 254 nm. The production dose is a solution of [ $^{18}\text{F}$ ]**7c** in 10% ethanol in 0.9% saline. A) UV chromatograph of production dose [ $^{18}\text{F}$ ]**7c**; B) radioactive chromatograph of production dose [ $^{18}\text{F}$ ]**7c**; C) UV chromatograph of co-injection of [ $^{18}\text{F}$ ]**7c** and cold **7c**; D) radiochemical chromatograph of co-injection of [ $^{18}\text{F}$ ]**7c** and **7c**.

Electronic Supplementary Information

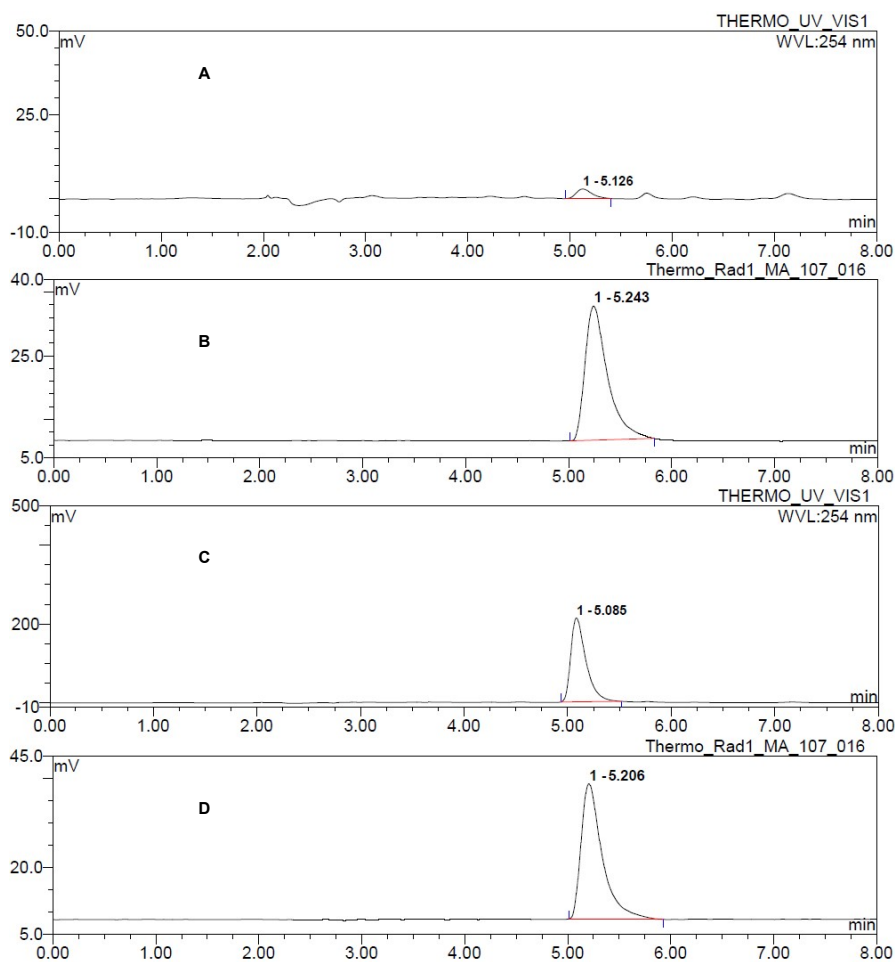

**Figure S3.** HPLC analysis of final radioactive dose [ $^{18}\text{F}$ ]7d. Analytical HPLC conditions: Phenomenex prodigy analytic column ( $250 \times 4.6$  mm,  $5 \mu\text{m}$ ), mobile phase 80% acetonitrile in 0.1 M ammonium formate, pH 4.5, flow rate 1.0 mL/min, detection wavelength 254 nm. The production dose is a solution of [ $^{18}\text{F}$ ]7d in 10% ethanol in 0.9% saline. A) UV chromatograph of production dose [ $^{18}\text{F}$ ]7d; B) radioactive chromatograph of production dose [ $^{18}\text{F}$ ]7d; C) UV chromatograph of co-injection of [ $^{18}\text{F}$ ]7d and cold 7d; D) radiochemical chromatograph of co-injection of [ $^{18}\text{F}$ ]7d and 7d.

Electronic Supplementary Information

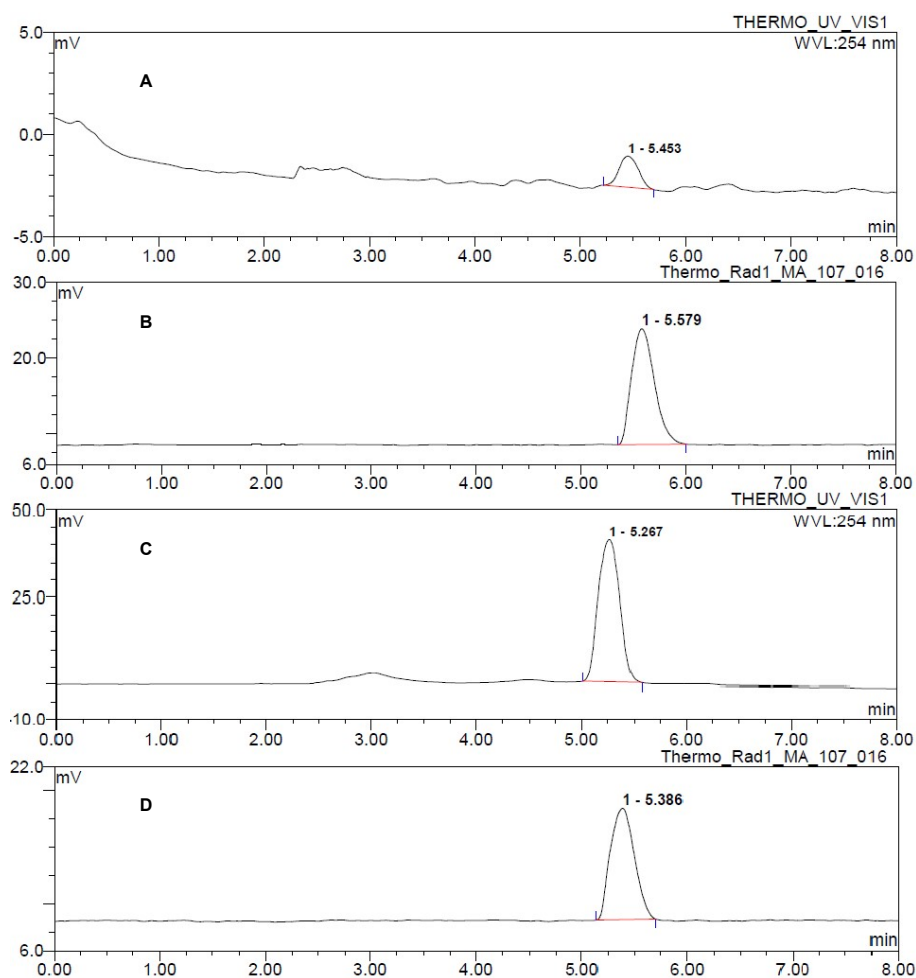

**Figure S4.** HPLC analysis of final radioactive dose [ $^{18}\text{F}$ ]**9a**. Analytical HPLC conditions: Agilent SB-C18 analytic column ( $250 \times 4.6$  mm,  $5 \mu\text{m}$ ), mobile phase 95% acetonitrile in 0.1 M ammonium formate, pH 4.5, flow rate 1.0 mL/min, detection wavelength 254 nm. The production dose is a solution of [ $^{18}\text{F}$ ]**9a** in 10% ethanol in 0.9% saline. A) UV chromatograph of production dose [ $^{18}\text{F}$ ]**9a**; B) radioactive chromatograph of production dose [ $^{18}\text{F}$ ]**9a**; C) UV chromatograph of co-injection of [ $^{18}\text{F}$ ]**9a** and cold **9a**; D) radiochemical chromatograph of co-injection of [ $^{18}\text{F}$ ]**9a** and **9a**.

Electronic Supplementary Information

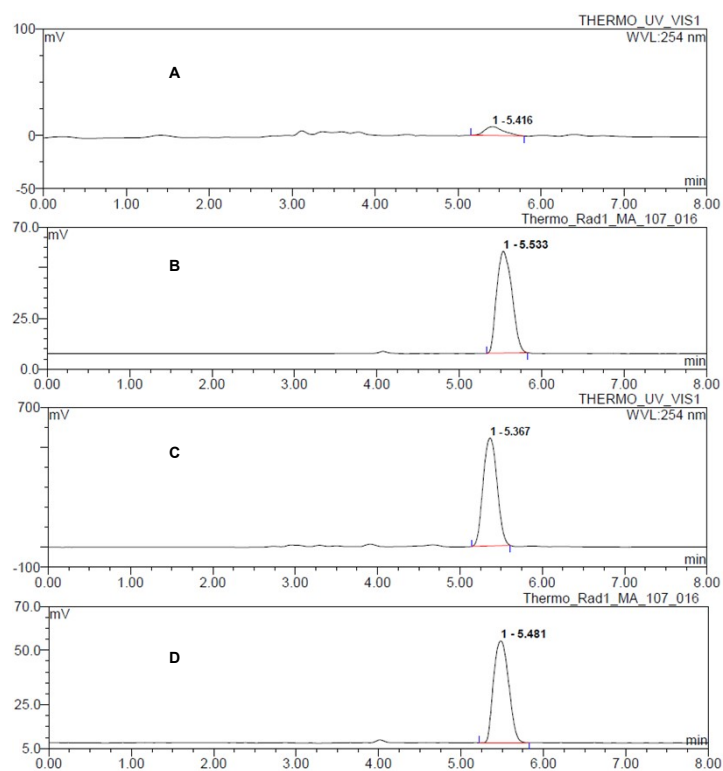

**Figure S5.** HPLC analysis of final radioactive dose [ $^{18}\text{F}$ ]**9c**. Analytical HPLC conditions: Agilent SB-C18 analytic column (250  $\times$  4.6 mm, 5  $\mu\text{m}$ ), mobile phase 95% acetonitrile in 0.1 M ammonium formate, pH 4.5, flow rate 1.0 mL/min, detection wavelength 254 nm. The production dose is a solution of [ $^{18}\text{F}$ ]**9c** in 10% ethanol in 0.9% saline. A) UV chromatograph of production dose [ $^{18}\text{F}$ ]**9c**; B) radioactive chromatograph of production dose [ $^{18}\text{F}$ ]**9c**; C) UV chromatograph of co-injection of [ $^{18}\text{F}$ ]**9c** and cold **9c**; D) radiochemical chromatograph of co-injection of [ $^{18}\text{F}$ ]**9c** and **9c**.



Electronic Supplementary Information

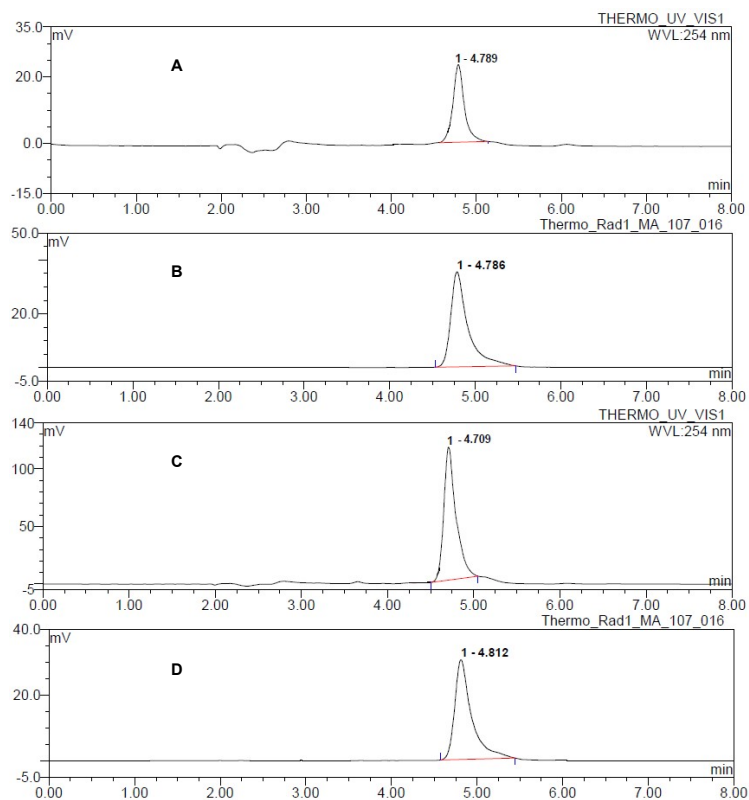

**Figure S6.** HPLC analysis of final radioactive dose [ $^{18}\text{F}$ ]**12b**. Analytical HPLC conditions: Phenomenex prodigy analytic column ( $250 \times 4.6$  mm,  $5 \mu\text{m}$ ), mobile phase 80% acetonitrile in 0.1 M ammonium formate, pH 4.5, flow rate 1.0 mL/min, detection wavelength 254 nm. The production dose is a solution of [ $^{18}\text{F}$ ]**12b** in 10% ethanol in 0.9% saline. A) UV chromatograph of production dose [ $^{18}\text{F}$ ]**12b**; B) radioactive chromatograph of production dose [ $^{18}\text{F}$ ]**12b**; C) UV chromatograph of co-injection of [ $^{18}\text{F}$ ]**12b** and cold **12b**; D) radiochemical chromatograph of co-injection of [ $^{18}\text{F}$ ]**12b** and **12b**.

Electronic Supplementary Information

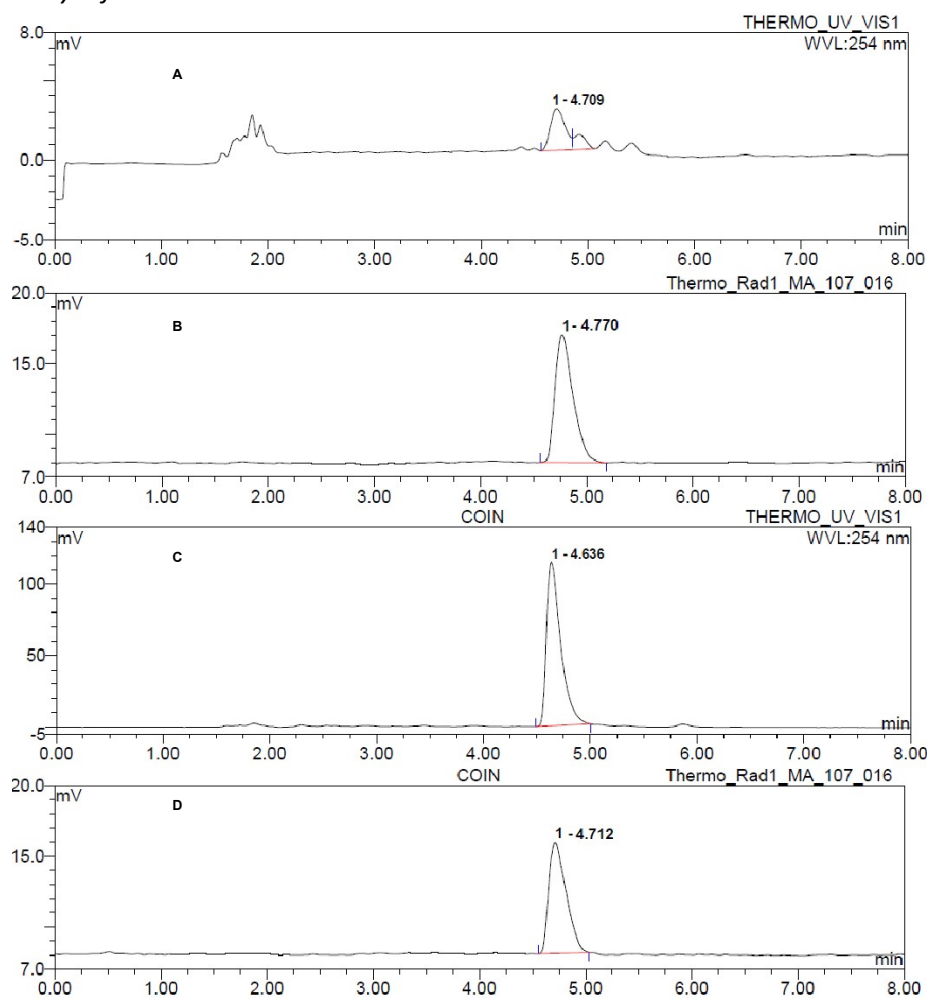

**Figure S7.** HPLC analysis of final radioactive dose [<sup>18</sup>F]**15b**. Analytical HPLC conditions: Agilent SB-C18 analytic column (250 × 4.6 mm, 5 μm), mobile phase 90% acetonitrile in 0.1 M ammonium formate, pH 4.5, flow rate 1.0 mL/min, detection wavelength 254 nm. The production dose is a solution of [<sup>18</sup>F]**15b** in 10% ethanol in 0.9% saline. A) UV chromatogram of production dose [<sup>18</sup>F]**15b**; B) radioactive chromatogram of production dose [<sup>18</sup>F]**15b**; C) UV chromatogram of co-injection of [<sup>18</sup>F]**15b** and cold **15b**; D) radiochemical chromatogram of co-injection of [<sup>18</sup>F]**15b** and **15b**.

Electronic Supplementary Information

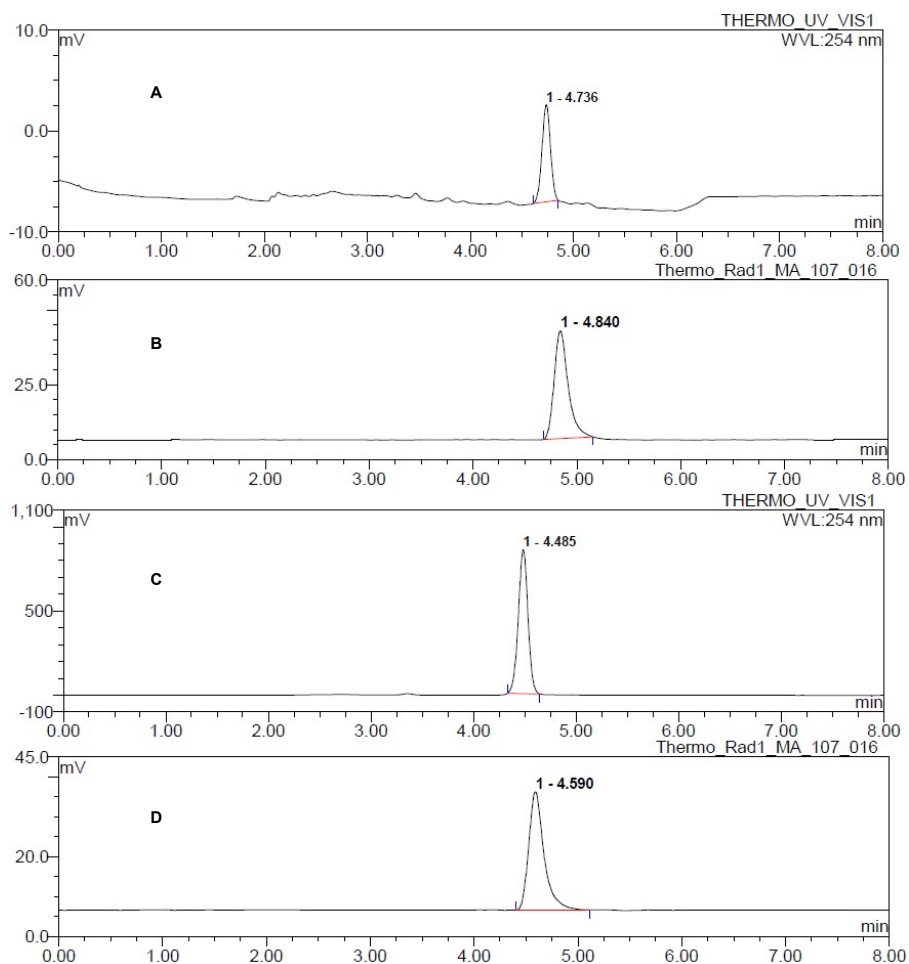

**Figure S8.** HPLC analysis of final radioactive dose [ $^{18}\text{F}$ ]**18a**. Analytical HPLC conditions: Agilent SB-C18 analytic column (250  $\times$  4.6 mm, 5  $\mu\text{m}$ ), mobile phase 95% acetonitrile in 0.1 M ammonium formate, pH 4.5, flow rate 1.0 mL/min, detection wavelength 254 nm. The production dose is a solution of [ $^{18}\text{F}$ ]**18a** in 10% ethanol in 0.9% saline. A) UV chromatograph of production dose [ $^{18}\text{F}$ ]**18a**; B) radioactive chromatograph of production dose [ $^{18}\text{F}$ ]**18a**; C) UV chromatograph of co-injection of [ $^{18}\text{F}$ ]**18a** and cold **18a**; D) radiochemical chromatograph of co-injection of [ $^{18}\text{F}$ ]**18a** and **18a**.

Electronic Supplementary Information

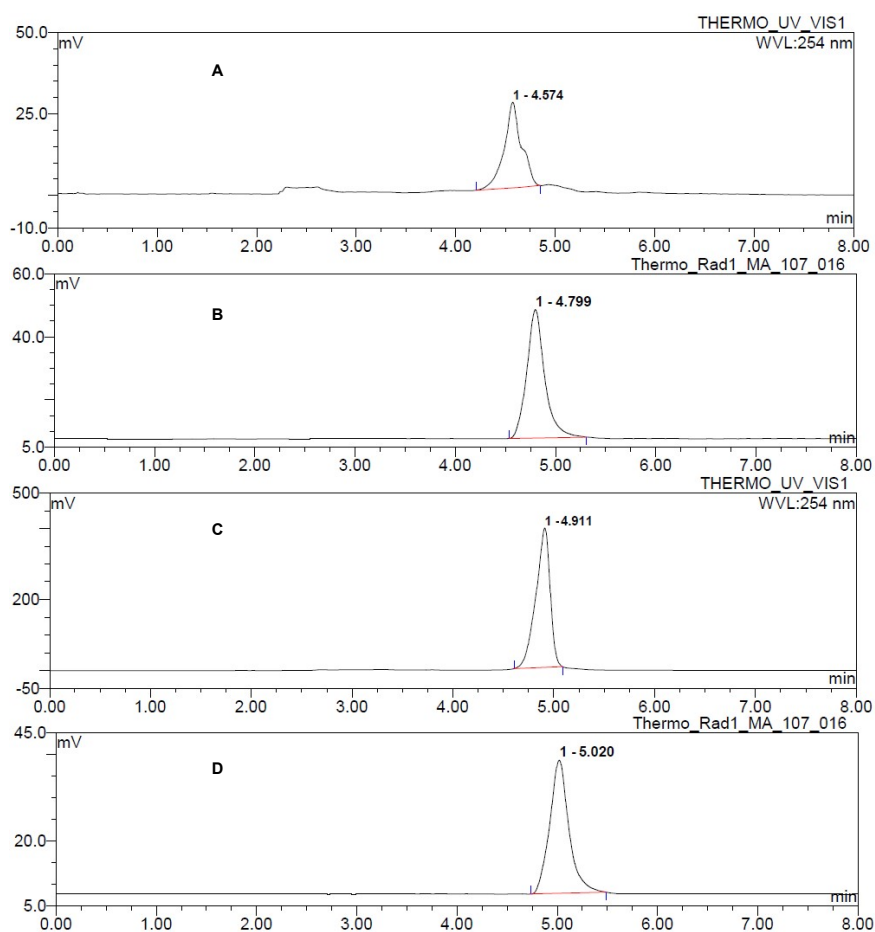

**Figure S9.** HPLC analysis of final radioactive dose [ $^{18}\text{F}$ ]**18b**. Analytical HPLC conditions: Phenomenex prodigy analytic column (250  $\times$  4.6 mm, 5  $\mu\text{m}$ ), mobile phase 80% acetonitrile in 0.1 M ammonium formate, pH 4.5, flow rate 1.0 mL/min, detection wavelength 254 nm. The production dose is a solution of [ $^{18}\text{F}$ ]**18b** in 10% ethanol in 0.9% saline. A) UV chromatograph of production dose [ $^{18}\text{F}$ ]**18b**; B) radioactive chromatograph of production dose [ $^{18}\text{F}$ ]**18b**; C) UV chromatograph of co-injection of [ $^{18}\text{F}$ ]**18b** and cold **18b**; D) radiochemical chromatograph of co-injection of [ $^{18}\text{F}$ ]**18b** and **18b**.

Electronic Supplementary Information

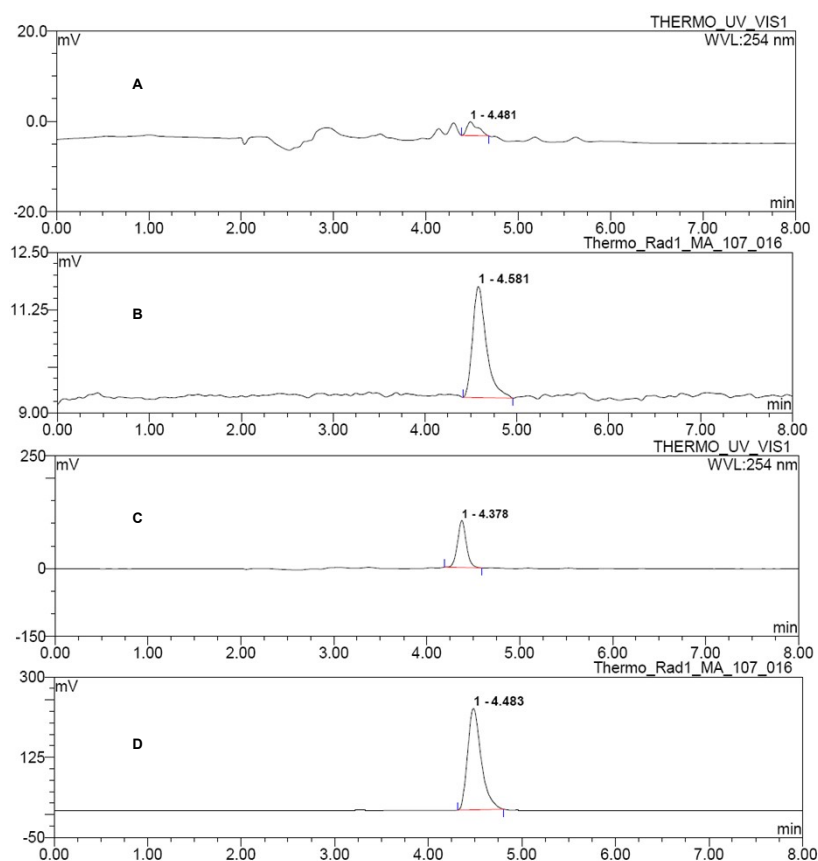

**Figure S10.** HPLC analysis of final radioactive dose [ $^{18}\text{F}$ ]**18c**. Analytical HPLC conditions: Agilent SB-C18 analytic column ( $250 \times 4.6$  mm,  $5 \mu\text{m}$ ), mobile phase 75% acetonitrile in 0.1 M ammonium formate, pH 4.5, flow rate 1.0 mL/min, detection wavelength 254 nm. The production dose is a solution of [ $^{18}\text{F}$ ]**18c** in 10% ethanol in 0.9% saline. A) UV chromatograph of production dose [ $^{18}\text{F}$ ]**18c**; B) radioactive chromatograph of production dose [ $^{18}\text{F}$ ]**18c**; C) UV chromatograph of co-injection of [ $^{18}\text{F}$ ]**18c** and cold **18c**; D) radiochemical chromatograph of co-injection of [ $^{18}\text{F}$ ]**18c** and **18c**.

Electronic Supplementary Information

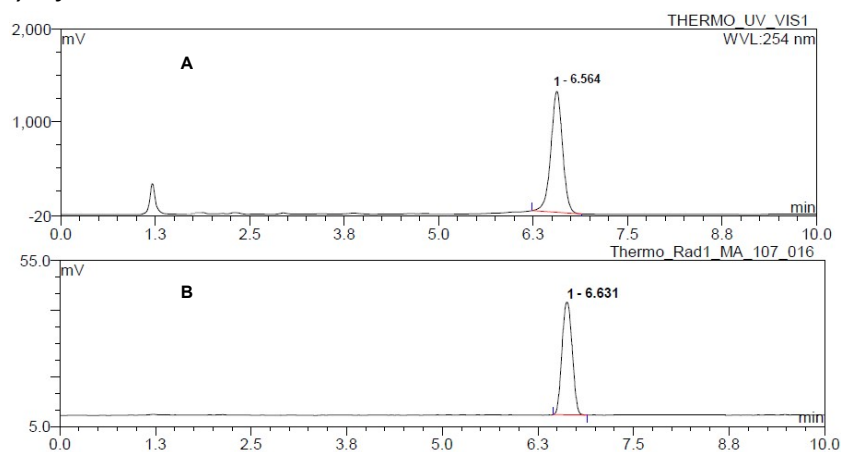

**Figure S11.** HPLC analysis of [ $^{18}\text{F}$ ]**17**. Analytical HPLC conditions: Phenomenex prodigy analytic column ( $250 \times 4.6$  mm,  $5 \mu\text{m}$ ), mobile phase 90% acetonitrile in 0.1 M ammonium formate, pH 4.5, flow rate 1.5 mL/min, detection wavelength 254 nm. A) UV chromatograph of co-injection of [ $^{18}\text{F}$ ]**17** and **17**; B) radiochemical chromatograph of co-injection of [ $^{18}\text{F}$ ]**17** and **17**.

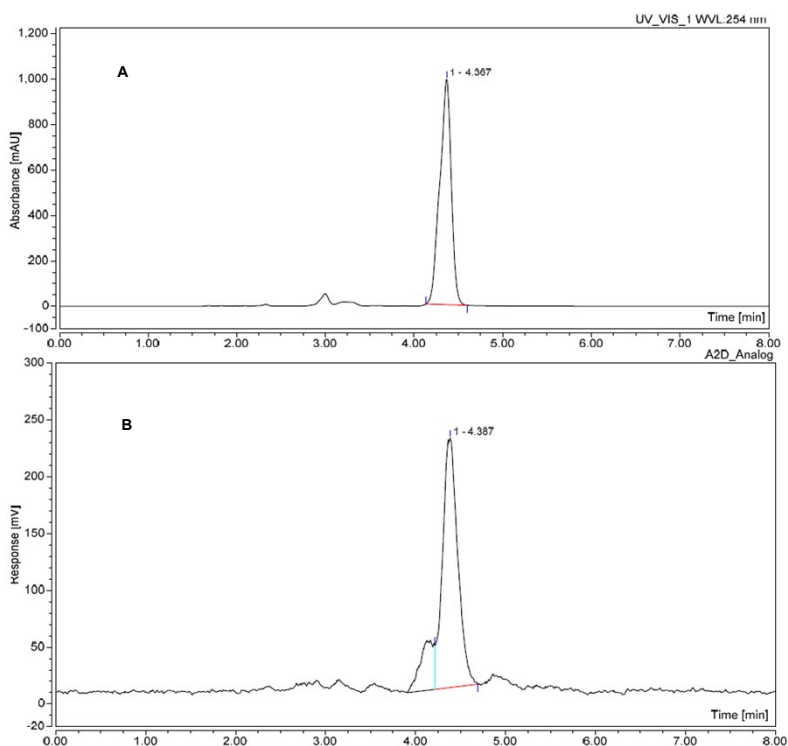

**Figure S12.** HPLC analysis of [ $^{18}\text{F}$ ]**22c**. Analytical HPLC conditions: Phenomenex prodigy analytic column ( $250 \times 4.6$  mm,  $5 \mu\text{m}$ ), mobile phase 95% acetonitrile in 0.1 M ammonium formate, pH 4.5, flow rate 1.5 mL/min, detection wavelength 254 nm. A) UV chromatograph of co-injection of [ $^{18}\text{F}$ ]**22c** and **22c**; B) radiochemical chromatograph of co-injection of [ $^{18}\text{F}$ ]**17** and **17**.

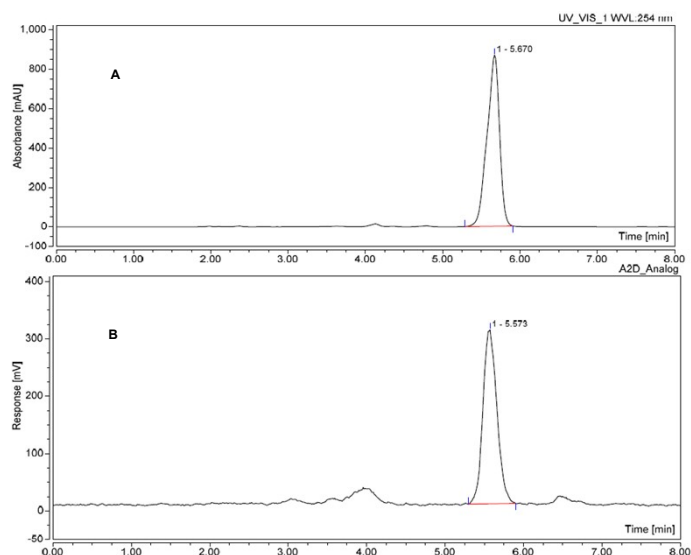

**Figure S13.** HPLC analysis of [ $^{18}\text{F}$ ]**23c**. Analytical HPLC conditions: Phenomenex prodigy analytic column ( $250 \times 4.6$  mm,  $5 \mu\text{m}$ ), mobile phase 95% acetonitrile in 0.1 M ammonium formate, pH 4.5, flow rate 1.5 mL/min, detection wavelength 254 nm. A) UV chromatograph of co-injection of [ $^{18}\text{F}$ ]**23c** and **23c**; B) radiochemical chromatograph of co-injection of [ $^{18}\text{F}$ ]**23** and **23**.

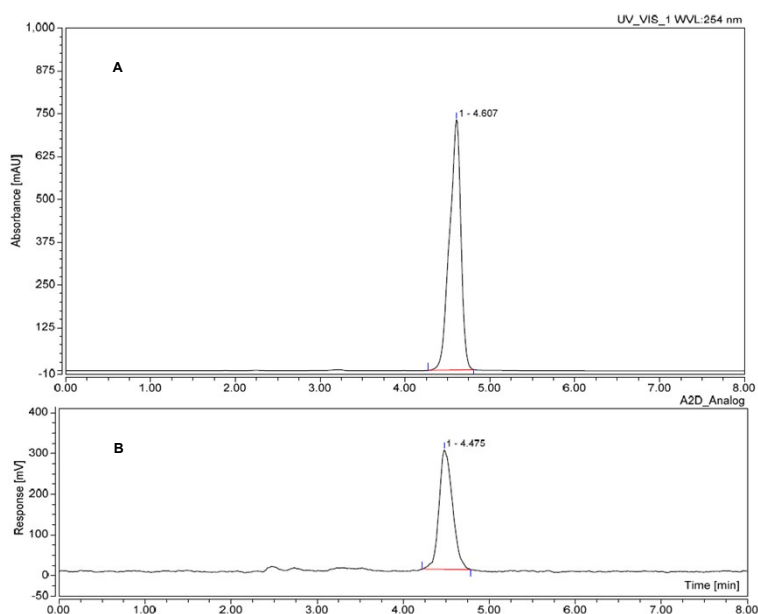

**Figure S14.** HPLC analysis of [ $^{18}\text{F}$ ]**24a**. Analytical HPLC conditions: Phenomenex prodigy analytic column ( $250 \times 4.6$  mm,  $5 \mu\text{m}$ ), mobile phase 95% acetonitrile in 0.1 M ammonium formate, pH 4.5, flow rate 1.5 mL/min, detection wavelength 254 nm. A) UV chromatograph of co-injection of [ $^{18}\text{F}$ ]**24a** and **24a**; B) radiochemical chromatograph of co-injection of [ $^{18}\text{F}$ ]**24a** and **24a**.

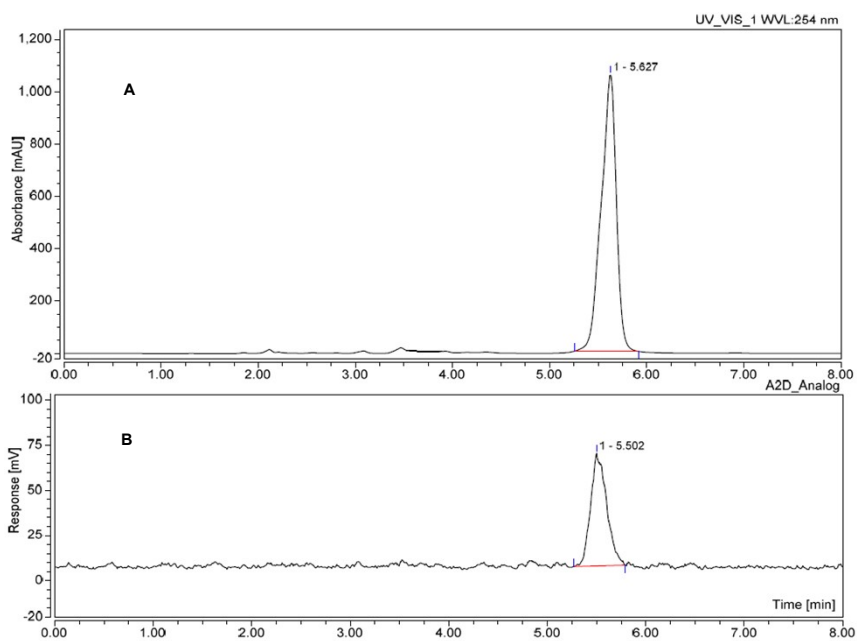

**Figure S15.** HPLC analysis of  $[^{18}\text{F}]\mathbf{24b}$ . Analytical HPLC conditions: Phenomenex prodigy analytic column ( $250 \times 4.6$  mm,  $5 \mu\text{m}$ ), mobile phase 95% acetonitrile in 0.1 M ammonium formate, pH 4.5, flow rate 1.5 mL/min, detection wavelength 254 nm. A) UV chromatograph of co-injection of  $[^{18}\text{F}]\mathbf{24b}$  and  $\mathbf{24b}$ ; B) radiochemical chromatograph of co-injection of  $[^{18}\text{F}]\mathbf{24b}$  and  $\mathbf{24b}$ .



**5. NMR data of compounds 6d, 22c, 23c, 24a, and 24b****Methyl (Z)-3-((2-fluoro-4-(N'-hydroxycarbamimidoyl)benzyl)amino)propanoate (6d)**

Synthesized by general procedure C starting with **5** and methyl 3-aminopropionate hydrochloride; yield: 53%; yellow oil; <sup>1</sup>H NMR (400 MHz, Acetone-*d*<sub>6</sub>) δ 7.52 (dd, *J* = 8.0, 1.5 Hz, 1H), 7.47 (t, *J* = 7.7 Hz, 1H), 7.42 (dd, *J* = 11.6, 1.4 Hz, 1H), 5.53 (s, 2H), 3.83 (s, 2H), 3.61 (s, 3H), 3.31 (s, 1H), 2.85 (t, *J* = 6.7 Hz, 3H), 2.51 (t, *J* = 6.7 Hz, 2H); <sup>13</sup>C NMR (100 MHz, Acetone-*d*<sub>6</sub>) δ 172.49, 160.69 (d, *J*<sub>C-F</sub> = 242.0 Hz), 150.22, 134.22 (d, *J*<sub>C-F</sub> = 8.0 Hz), 129.92 (d, *J*<sub>C-F</sub> = 5.0 Hz), 128.40 (d, *J*<sub>C-F</sub> = 16.0 Hz), 121.02, 111.91 (d, *J*<sub>C-F</sub> = 26.0 Hz), 50.70, 50.66, 45.92, 45.89, 44.37, 34.26.

**Methyl 3-((2-fluoro-4-(5-(2'-methyl-2-(trifluoromethyl)-[1,1'-biphenyl]-4-yl)-1,2,4-oxadiazol-3-yl)benzyl)amino)propanoate (22c)**

Synthesized by general procedure F starting from **2c** and **6d**; yield: 58%; yellow oil; <sup>1</sup>H NMR (400 MHz, Acetone-*d*<sub>6</sub>) δ 8.60 (s, 1H), 8.51 (d, *J* = 7.9 Hz, 1H), 7.98 (dd, *J* = 7.9, 1.2 Hz, 1H), 7.82 (dd, *J* = 10.6, 1.2 Hz, 1H), 7.73 (t, *J* = 7.7 Hz, 1H), 7.65 (d, *J* = 8.0 Hz, 1H), 7.36 (q, *J* = 7.0 Hz, 2H), 7.29 (td, *J* = 7.1, 1.9 Hz, 1H), 7.20 (d, *J* = 7.5 Hz, 1H), 3.93 (s, 2H), 3.63 (s, 3H), 2.90 (t, *J* = 6.6 Hz, 2H), 2.54 (t, *J* = 6.6 Hz, 2H), 2.43 (s, 1H), 2.08 (d, *J* = 3.2 Hz, 3H); <sup>13</sup>C NMR (100 MHz, Acetone-*d*<sub>6</sub>) δ 174.60, 172.43, 168.05, 160.98 (d, *J*<sub>C-F</sub> = 245.0 Hz), 145.32, 137.67, 135.45, 133.40, 131.88, 131.73, 131.11, 130.92 (d, *J*<sub>C-F</sub> = 5.0 Hz), 129.79, 129.35 (d, *J*<sub>C-F</sub> = 30.0 Hz), 128.87, 128.53, 126.88 (d, *J*<sub>C-F</sub> = 9.0 Hz), 125.58 (q, *J*<sub>C-F</sub> = 5.0 Hz), 125.11, 124.92, 123.67, 123.56 (q, *J*<sub>C-F</sub> = 272.0 Hz), 123.06 (d, *J*<sub>C-F</sub> = 3.0 Hz), 113.62 (d, *J*<sub>C-F</sub> = 25.0 Hz), 50.67, 45.95, 45.92, 44.54, 34.36, 19.25; HRMS (ESI) calcd for C<sub>27</sub>H<sub>24</sub>F<sub>4</sub>N<sub>3</sub>O<sub>3</sub> [M + H]<sup>+</sup> 514.1748, found 514.1737.

**Methyl 3-((2-fluoro-4-(5-(2'-methyl-2-(trifluoromethyl)-[1,1'-biphenyl]-4-yl)-1,2,4-oxadiazol-3-yl)benzyl)-(methyl)amino)propanoate (23c)**

Synthesized by general procedure F starting with **2c** and **6b**; yield: 60%; yellow oil; <sup>1</sup>H NMR (400 MHz, Acetone-*d*<sub>6</sub>) δ 8.56 (s, 1H), 8.43 (d, *J* = 7.9 Hz, 1H), 7.93 (d, *J* = 7.9 Hz, 1H), 7.78 (d, *J* = 10.4 Hz, 1H), 7.63 (t, *J* = 7.6 Hz, 1H), 7.58 (d, *J* = 8.0 Hz, 1H), 7.39 – 7.30 (m, 2H), 7.27 (t, *J* = 7.1 Hz, 1H), 7.18 (d, *J* = 7.5 Hz, 1H), 3.63 (s, 5H), 2.77 (t, *J* = 7.0 Hz, 2H), 2.54 (t, *J* = 7.0 Hz, 2H), 2.25 (s, 3H), 2.07 (s, 3H); <sup>13</sup>C NMR (100 MHz, Acetone-*d*<sub>6</sub>) δ 174.48, 172.08, 167.97 (d, *J*<sub>C-F</sub> = 2.0 Hz), 161.16 (d, *J*<sub>C-F</sub> = 245.0 Hz), 145.33, 137.64, 135.43, 133.30, 131.94 (d, *J*<sub>C-F</sub> = 4.0 Hz), 131.00, 129.80 (t, *J*<sub>C-F</sub> = 7.0 Hz), 129.38 (d, *J*<sub>C-F</sub> = 30.0 Hz), 128.88, 128.54, 127.10 (d, *J*<sub>C-F</sub> = 9.0 Hz), 125.54 (q, *J*<sub>C-F</sub> = 5.0 Hz), 125.10, 123.57, 123.53 (q, *J*<sub>C-F</sub> = 272.0 Hz), 122.94 (d, *J*<sub>C-F</sub> = 3.0 Hz), 113.80 (d, *J*<sub>C-F</sub> = 25.0 Hz), 53.81, 52.71, 50.79, 50.76, 41.34, 32.39, 19.37; HRMS (ESI) calcd for C<sub>28</sub>H<sub>26</sub>F<sub>4</sub>N<sub>3</sub>O<sub>3</sub> [M + H]<sup>+</sup> 528.1905, found 528.1895.

**3-(4-(1,3-Dioxolan-2-yl)-3-fluorophenyl)-5-(2'-methyl-2-(trifluoromethyl)-[1,1'-biphenyl]-4-yl)-1,2,4-oxadiazole (24a)**

To a suspension of anhydrous iron(III) chloride (0.5 equiv) and 2-fluoro-4-(5-(2'-methyl-2-(trifluoromethyl)-[1,1'-biphenyl]-4-yl)-1,2,4-oxadiazol-3-yl)benzaldehyde **19** (1.0 equiv) in acetonitrile (50 mL/mmol) were added 1, 2-bis(trimethylsiloxy)ethane (5.0 equiv). The resulting reaction mixture was stirred at RT for 1 h and monitored *via* TLC. Once the starting material was consumed, the solution was cooled to room temperature, and the solvent was removed under reduced pressure to afford the crude residue. The resulting residue was purified by silica gel column chromatography with 20~40% EtOAc in hexane to afford the desired acetal ring. Yield: 86%; white solid; <sup>1</sup>H NMR (400 MHz, Acetone-*d*<sub>6</sub>) δ 8.61 (s, 1H), 8.52 (d, *J* =

*Electronic Supplementary Information*

8.0 Hz, 1H), 8.03 (d,  $J = 8.0$  Hz, 1H), 7.89 (d,  $J = 10.8$  Hz, 1H), 7.79 (t,  $J = 7.3$  Hz, 1H), 7.65 (d,  $J = 7.9$  Hz, 1H), 7.41 – 7.31 (m, 2H), 7.27 (t,  $J = 7.1$  Hz, 1H), 7.19 (d,  $J = 7.5$  Hz, 1H), 6.09 (s, 1H), 4.20 – 4.10 (m, 2H), 4.10 – 4.00 (m, 2H), 2.06 (s, 3H);  $^{13}\text{C}$  NMR (100 MHz, Acetone- $d_6$ )  $\delta$  174.82, 167.79, 161.04 (d,  $J_{\text{C-F}} = 249.0$  Hz), 145.36, 137.64, 135.43, 133.43, 131.17, 129.78, 129.26, 129.16 (d,  $J_{\text{C-F}} = 5.0$  Hz), 129.00 (d,  $J_{\text{C-F}} = 4.0$  Hz), 128.86 (d,  $J_{\text{C-F}} = 1.0$  Hz), 128.53, 125.61 (q,  $J_{\text{C-F}} = 6.0$  Hz), 125.10, 123.60, 123.54 (q,  $J_{\text{C-F}} = 273.0$  Hz), 123.06 (d,  $J_{\text{C-F}} = 3.0$  Hz), 114.20 (d,  $J_{\text{C-F}} = 24.0$  Hz), 98.02 (d,  $J_{\text{C-F}} = 4.0$  Hz), 65.27, 19.23. HRMS (ESI) calcd for  $\text{C}_{25}\text{H}_{19}\text{F}_4\text{N}_2\text{O}_3$  [ $\text{M} + \text{H}$ ] $^+$  471.1326, found 471.1309.

**3-(3-Fluoro-4-(1,3,6-trioxocan-2-yl)phenyl)-5-(2'-methyl-2-(trifluoromethyl)-[1,1'-bi phenyl]-4-yl)-1,2,4-oxadiazole (24b)**

To a suspension of anhydrous iron(III) chloride (0.5 equiv) and 2-fluoro-4-(5-(2'-methyl-2-(trifluoromethyl)-[1,1'-biphenyl]-4-yl)-1,2,4-oxadiazol-3-yl)benzaldehyde **19** (1.0 equiv) in acetonitrile (50 mL/mmol) were added 2, 2, 10, 10-tetramethyl-3, 6, 9-trioxa-2, 10-disilaundecane (5.0 equiv). The resulting reaction mixture was stirred at RT for 1 h and monitored *via* TLC. Once the starting material was consumed, the solution was cooled to room temperature, and the solvent was removed under reduced pressure to afford the crude residue. The resulting residue was purified by neutral aluminum oxide column chromatography for (**22b**) with 20~40% EtOAc in hexane to afford the desired acetal ring. Yield: 78%; colorless oil;  $^1\text{H}$  NMR (400 MHz, Acetone- $d_6$ )  $\delta$  8.61 (s, 1H), 8.51 (d,  $J = 8.0$  Hz, 1H), 8.05 – 7.96 (m, 1H), 7.90 – 7.77 (m, 2H), 7.65 (d,  $J = 8.0$  Hz, 1H), 7.36 (q,  $J = 7.5$  Hz, 2H), 7.32 – 7.25 (m, 1H), 7.20 (d,  $J = 7.5$  Hz, 1H), 5.93 (s, 1H), 4.11 – 3.84 (m, 6H), 3.74 (ddd,  $J = 11.1, 8.6, 3.9$  Hz, 2H), 2.08 (s, 3H);  $^{13}\text{C}$  NMR (100 MHz, Acetone- $d_6$ )  $\delta$  174.72, 167.91, 160.00 (d,  $J_{\text{C-F}} = 247.0$  Hz), 145.35, 137.66, 135.44, 133.41, 131.56 (d,  $J_{\text{C-F}} = 13.0$  Hz), 131.14, 129.79, 129.51, 129.21, 128.88, 128.54, 128.27 (d,  $J_{\text{C-F}} = 8.0$  Hz), 128.06 (d,  $J_{\text{C-F}} = 4.0$  Hz), 125.60 (q,  $J_{\text{C-F}} = 6.0$  Hz), 125.11, 123.63, 123.56 (q,  $J_{\text{C-F}} = 273.0$  Hz), 122.82 (d,  $J_{\text{C-F}} = 3.0$  Hz), 114.09, 113.85, 109.99, 101.17, 73.38, 71.42, 19.26. HRMS (ESI) calcd for  $\text{C}_{27}\text{H}_{23}\text{F}_4\text{N}_2\text{O}_4$  [ $\text{M} + \text{H}$ ] $^+$  515.1588, found 515.1582.

## 6. NMR spectra of new compounds

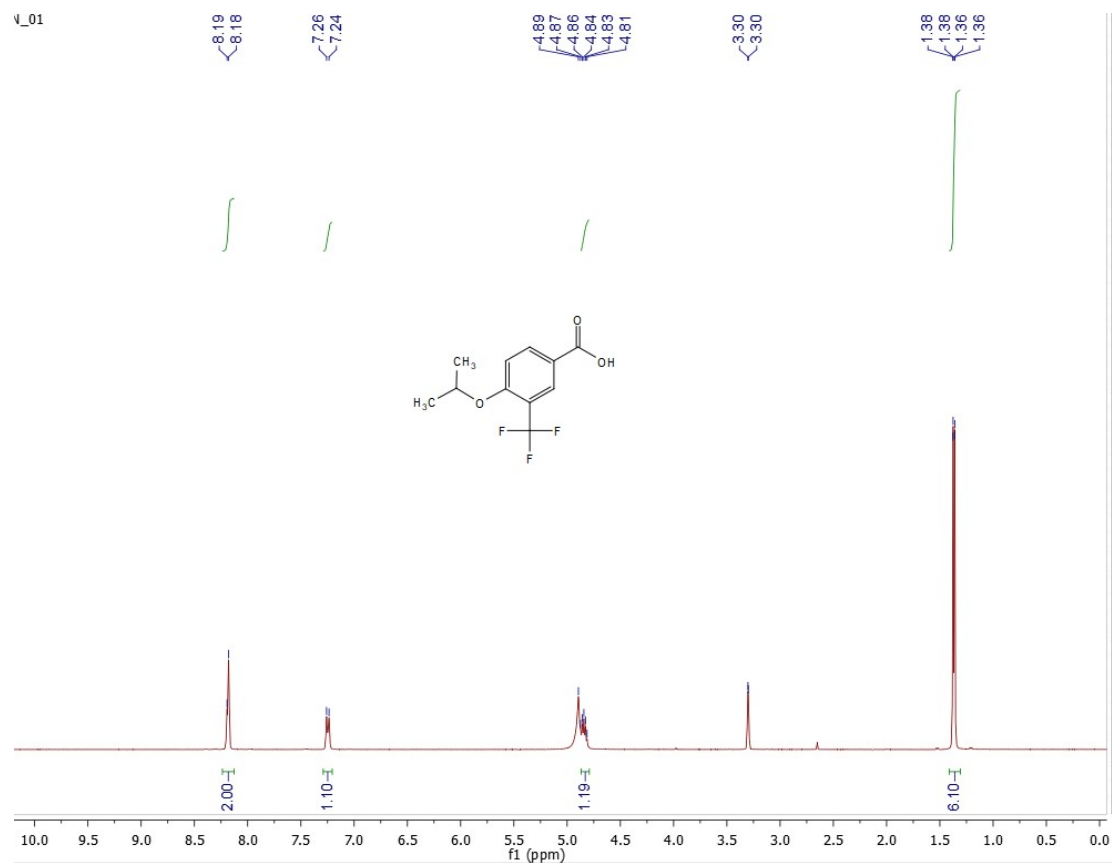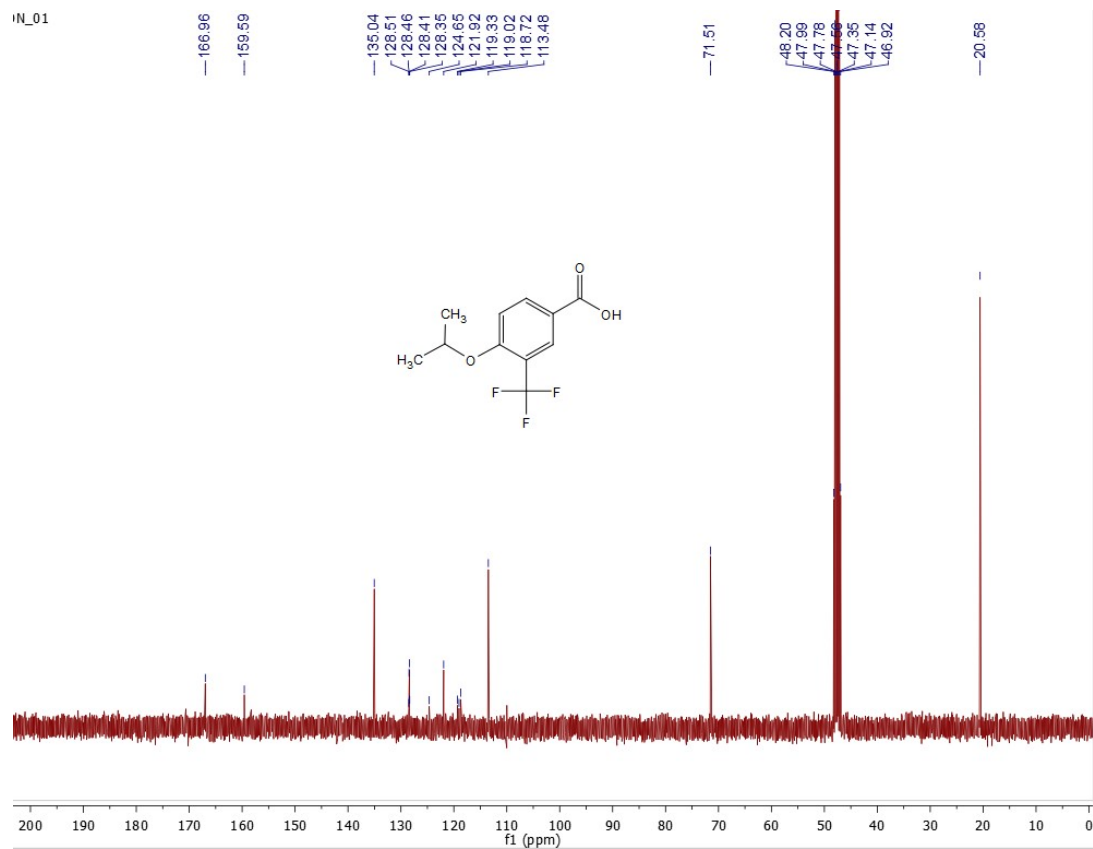

$^1\text{H}$  NMR and  $^{13}\text{C}$  NMR of **2a**

Electronic Supplementary Information

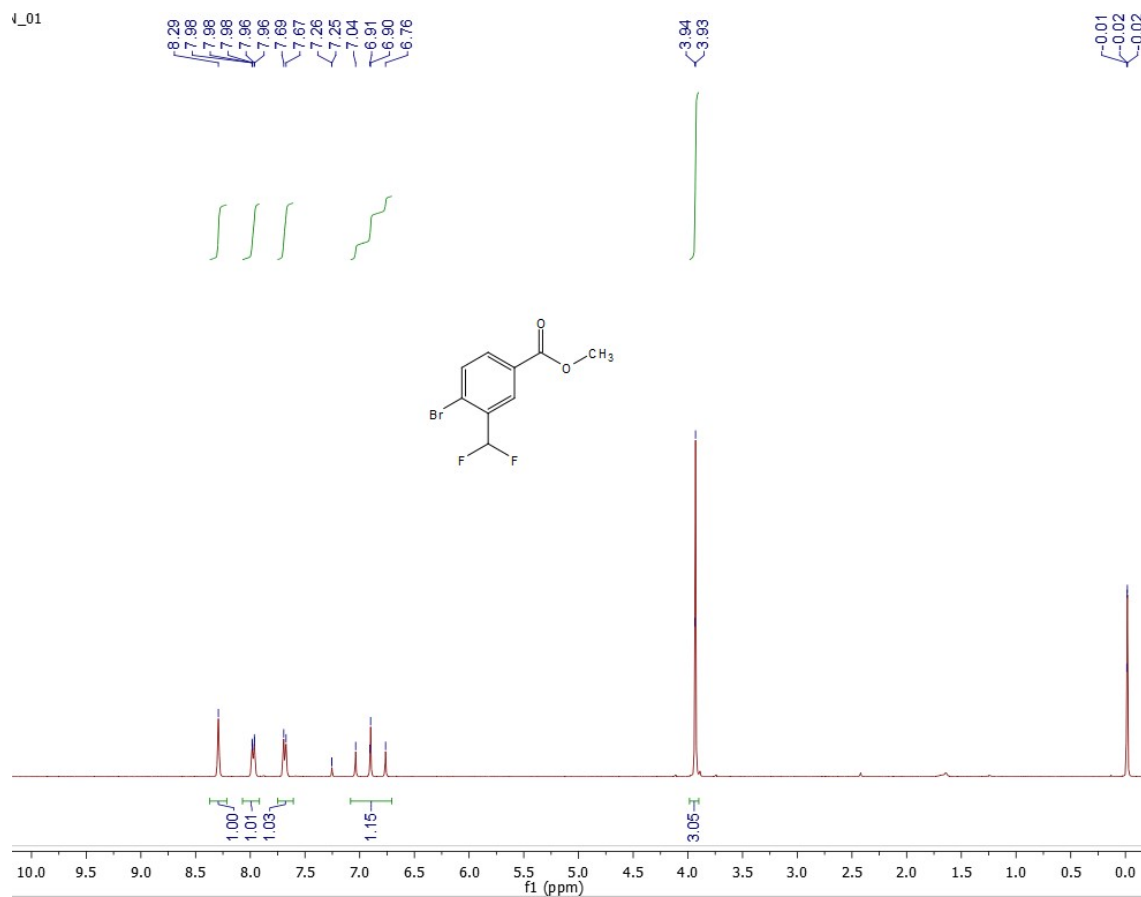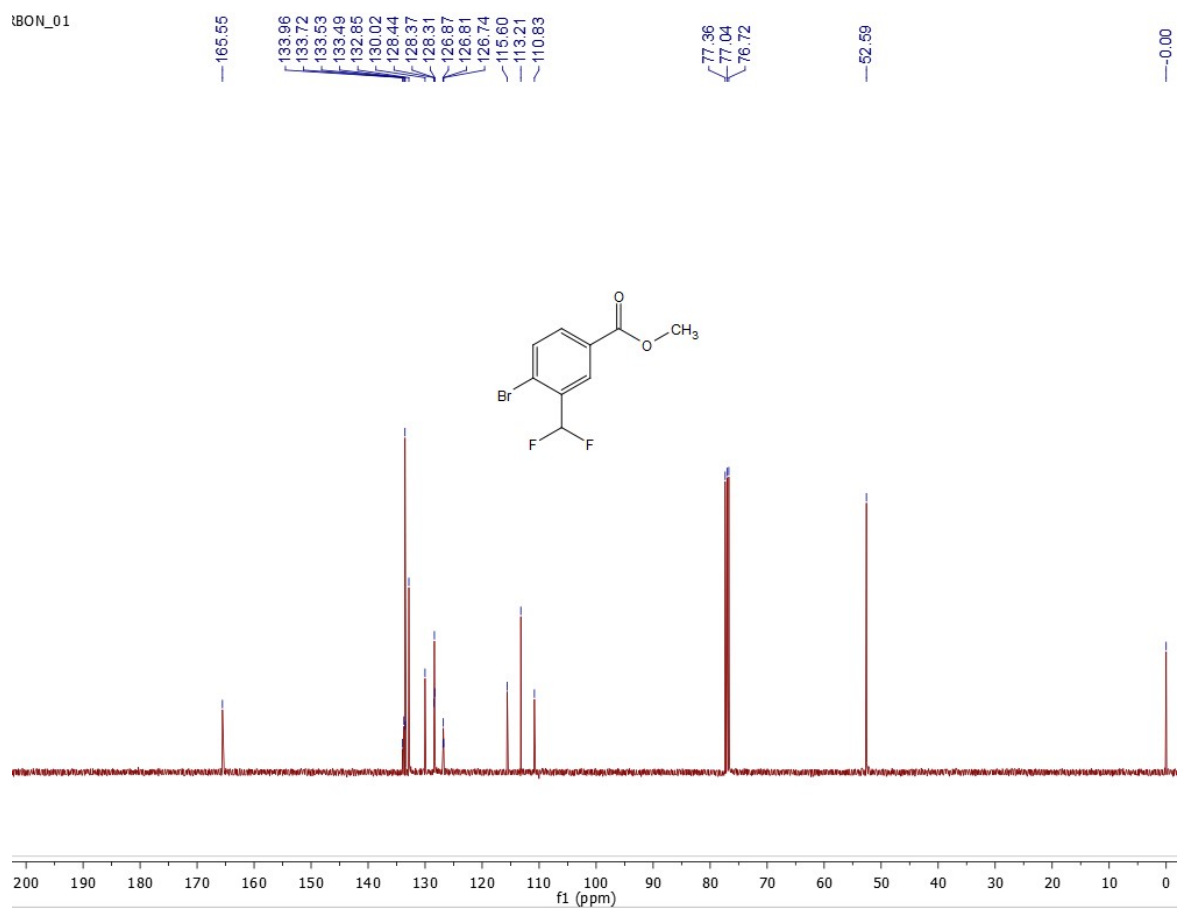

<sup>1</sup>H NMR and <sup>13</sup>C NMR of 4

Electronic Supplementary Information

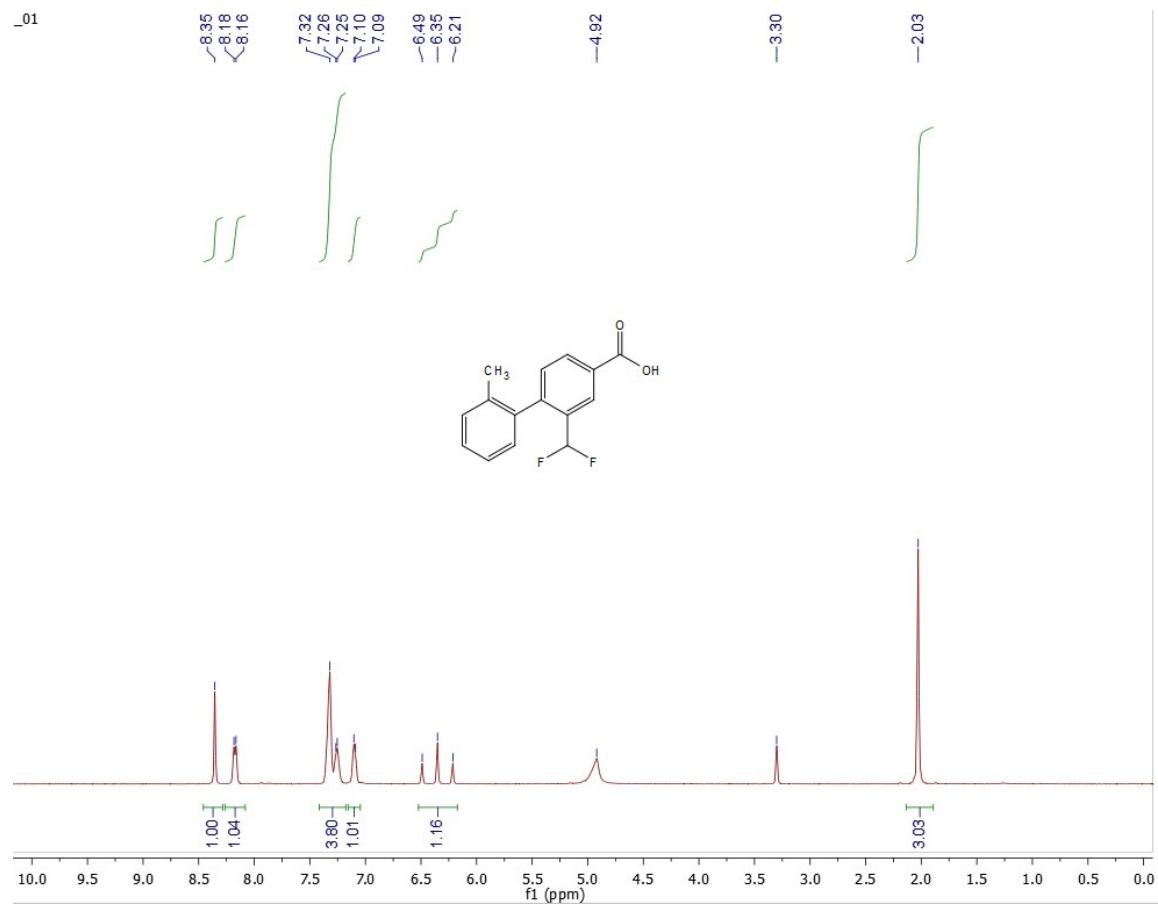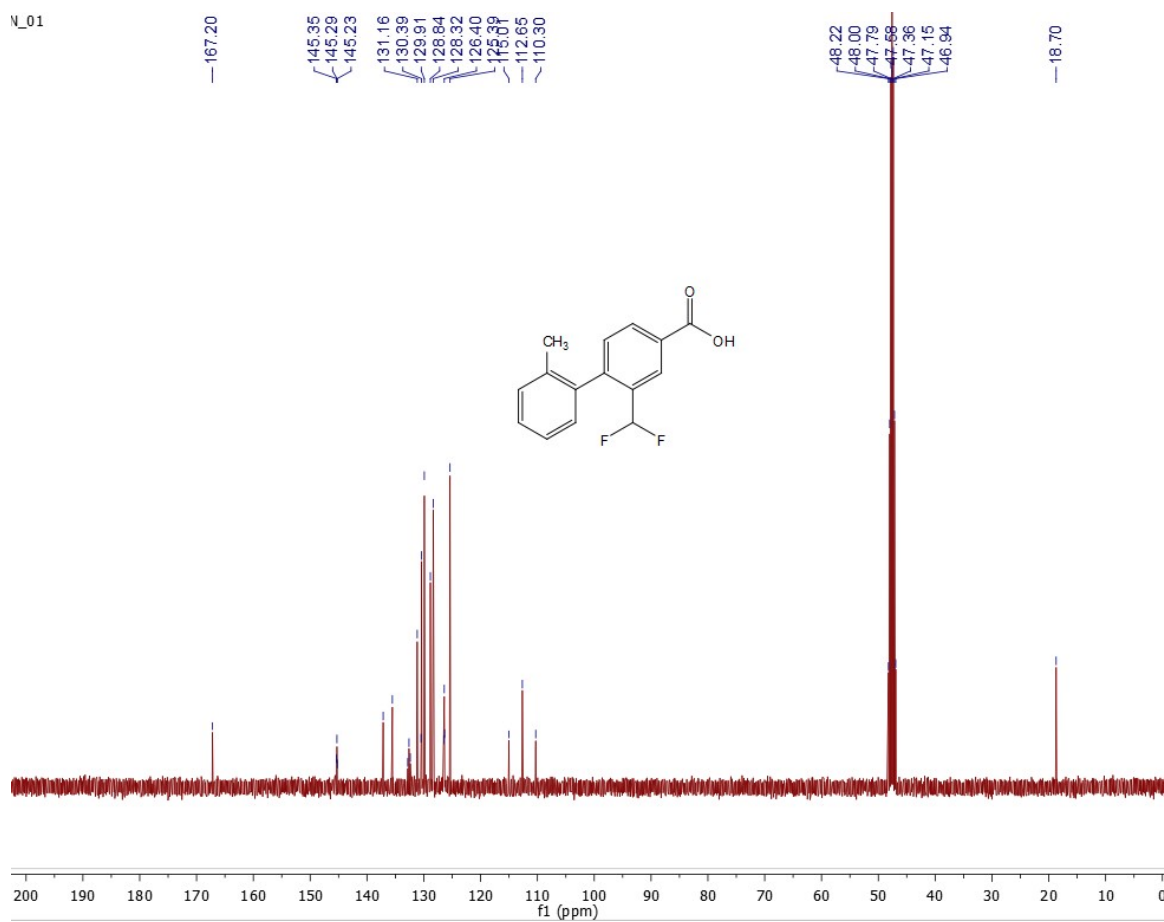

<sup>1</sup>H NMR and <sup>13</sup>C NMR of **2b**

Electronic Supplementary Information

N\_01

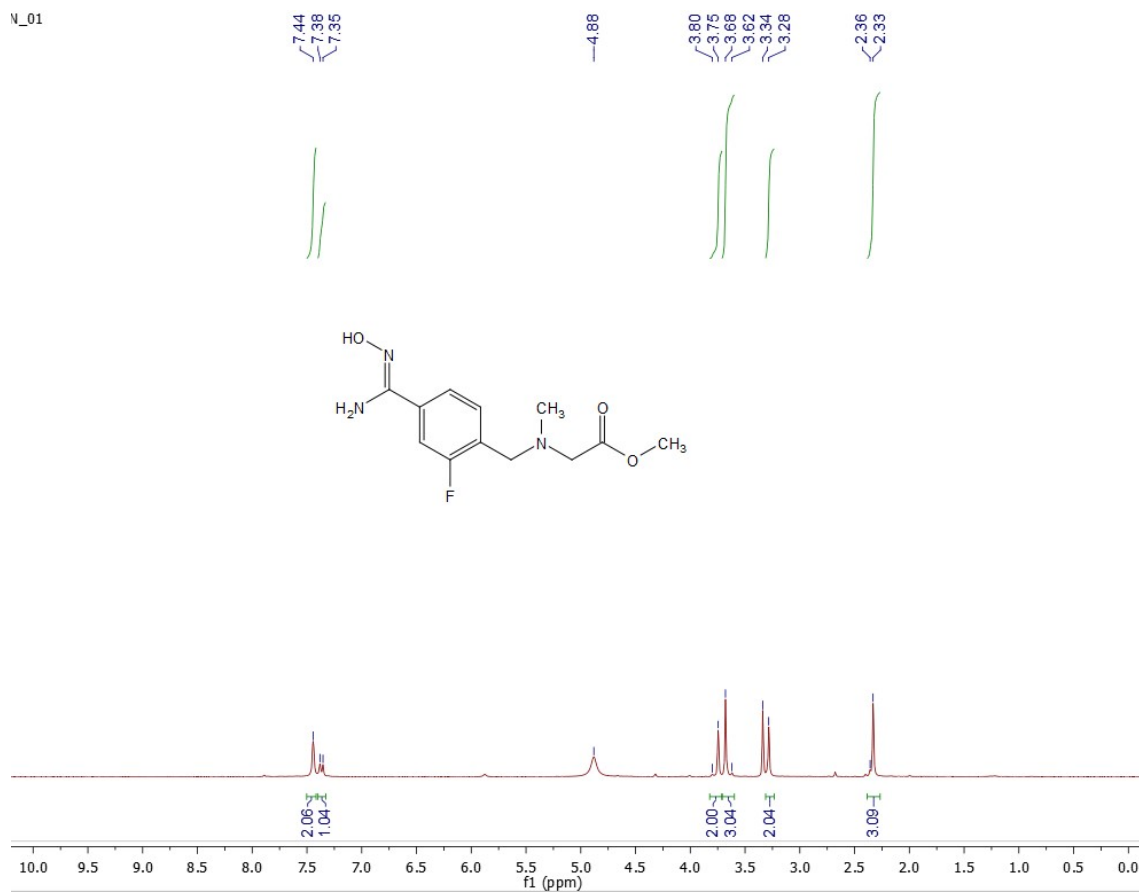

ION\_01

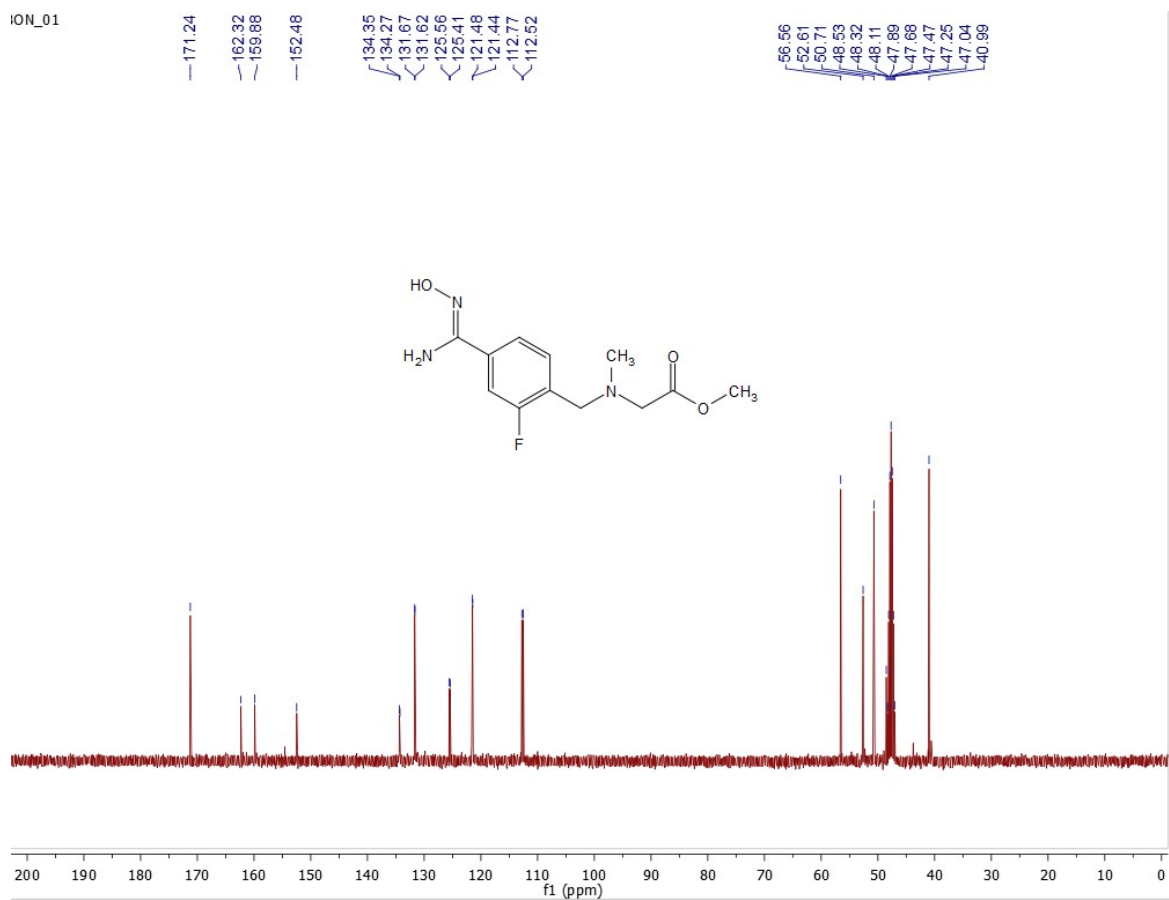

<sup>1</sup>H NMR and <sup>13</sup>C NMR of **6a**

Electronic Supplementary Information

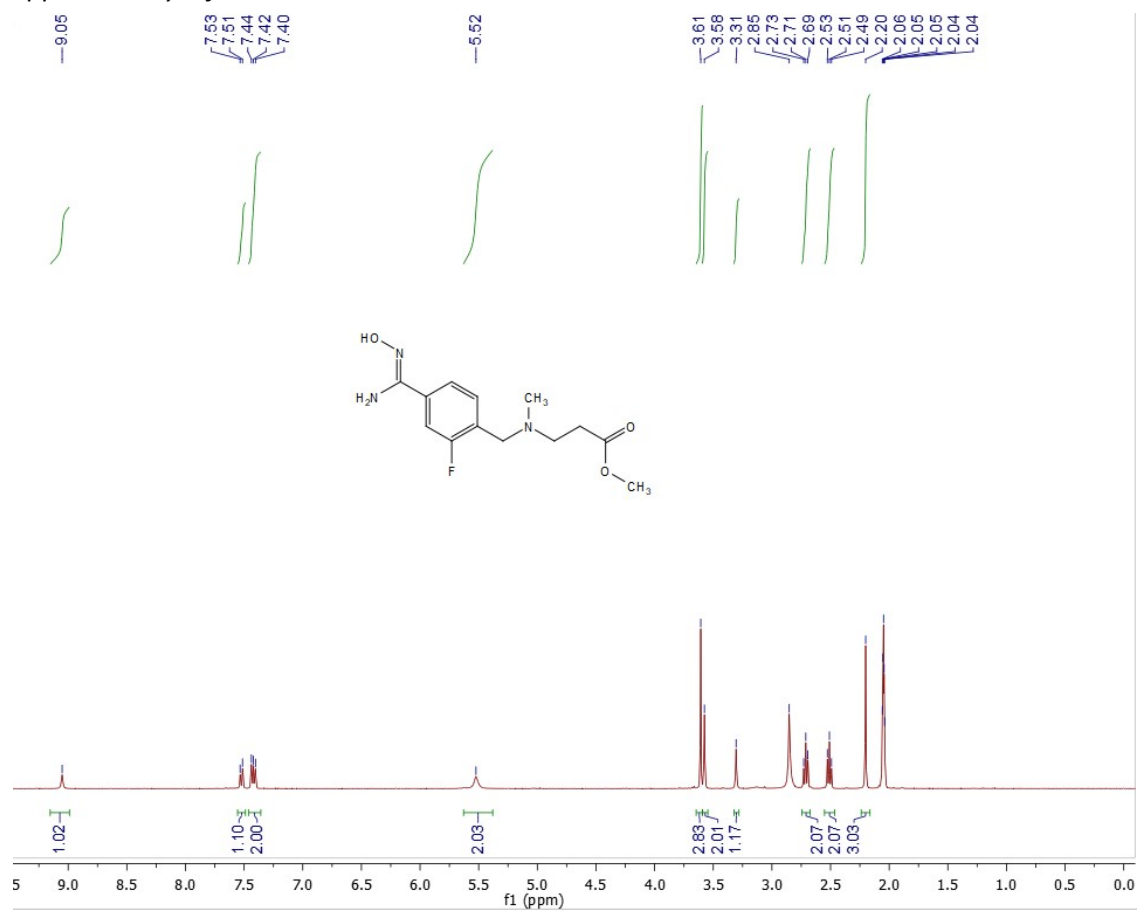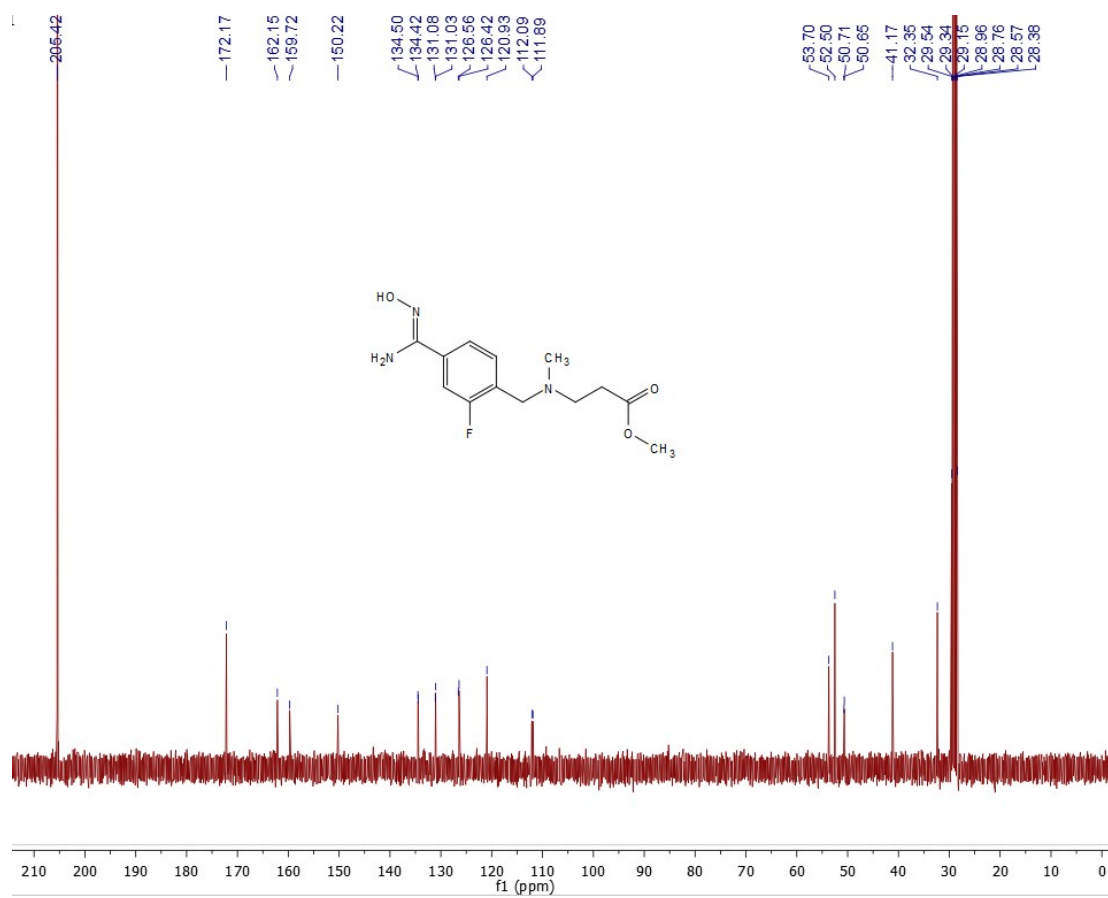

$^1\text{H}$  NMR and  $^{13}\text{C}$  NMR of **6b**

Electronic Supplementary Information

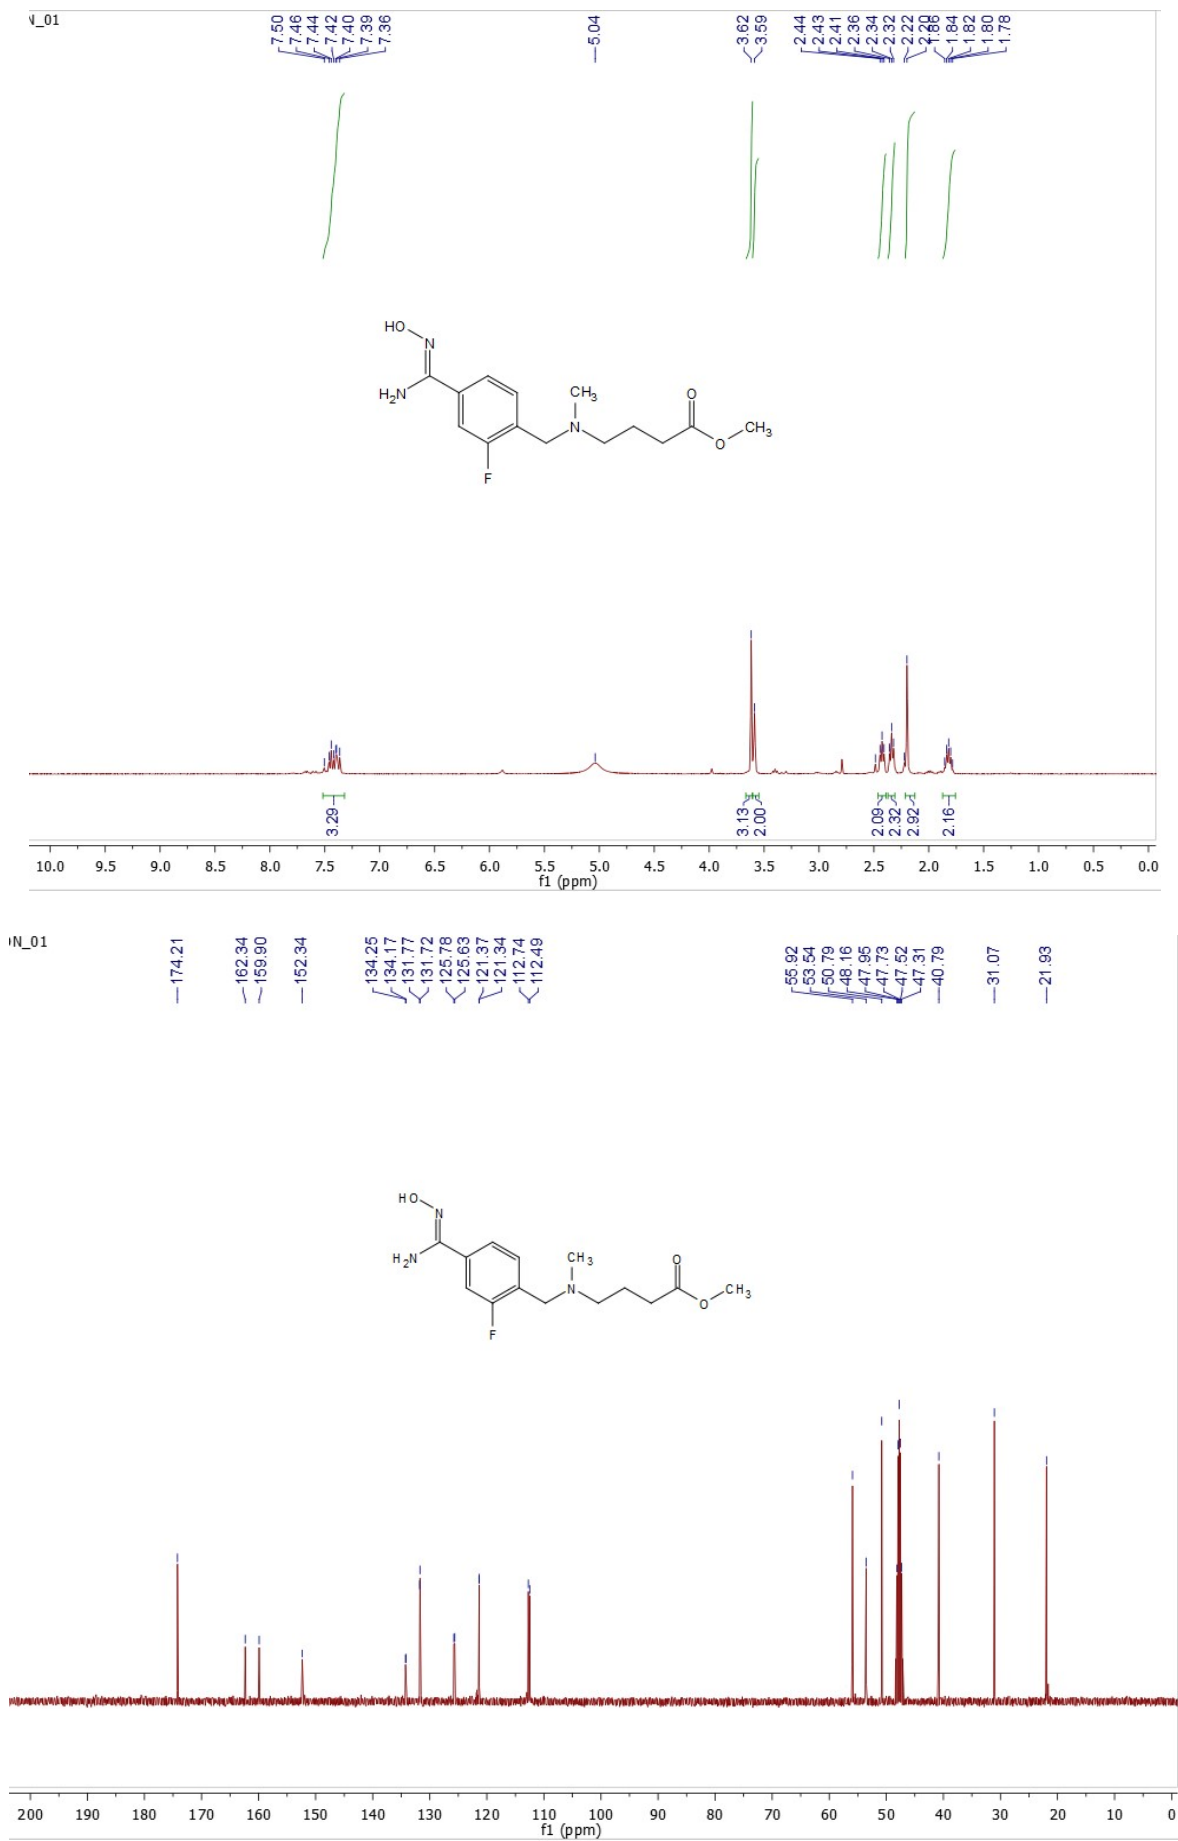

$^1\text{H}$  NMR and  $^{13}\text{C}$  NMR of **6c**



Electronic Supplementary Information

N\_01

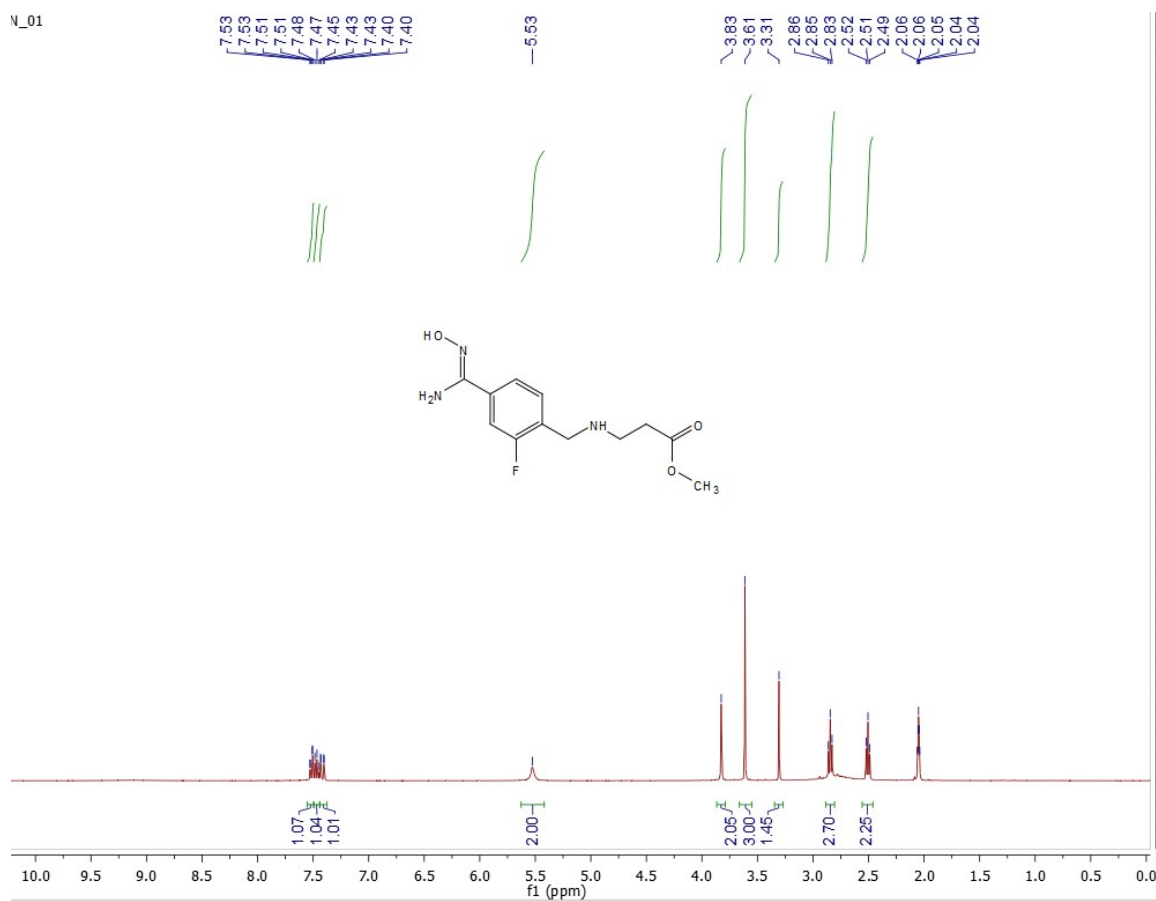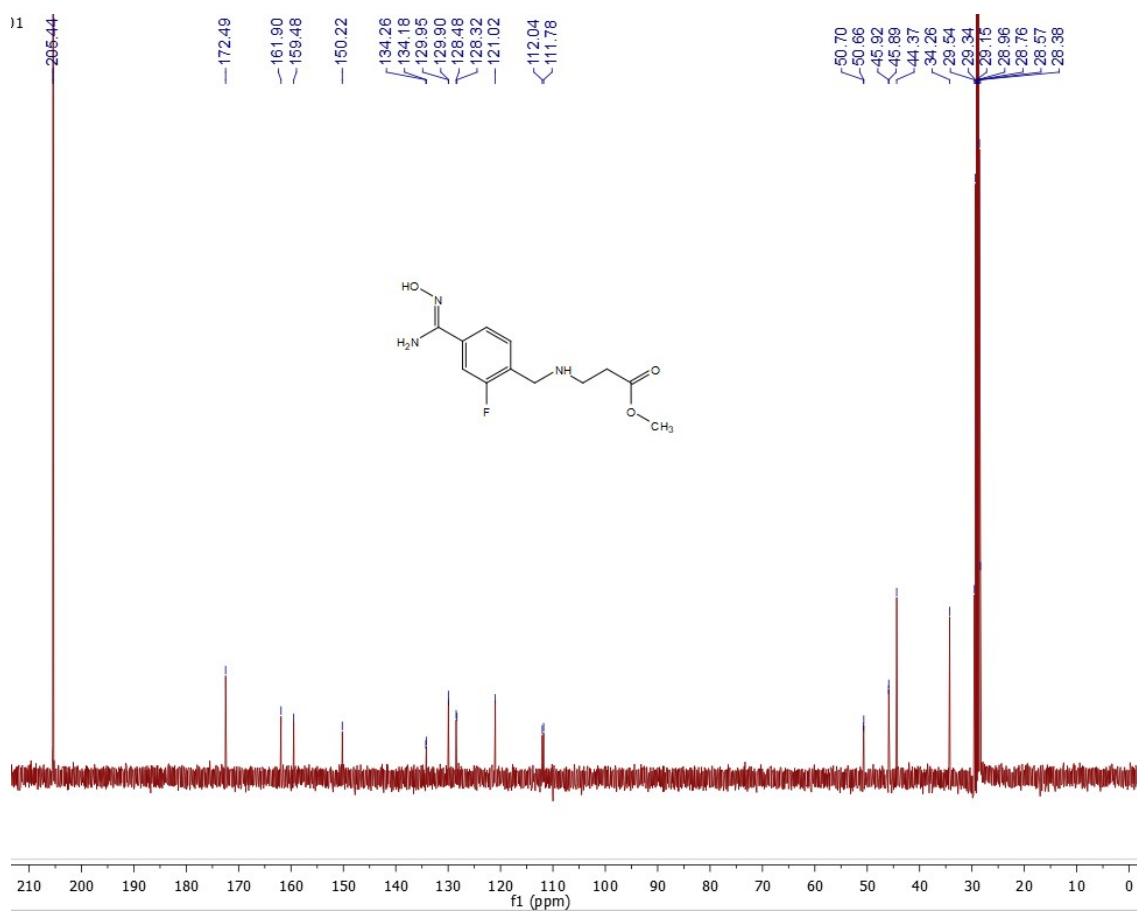

<sup>1</sup>H NMR and <sup>13</sup>C NMR of 6d

Electronic Supplementary Information

N\_01

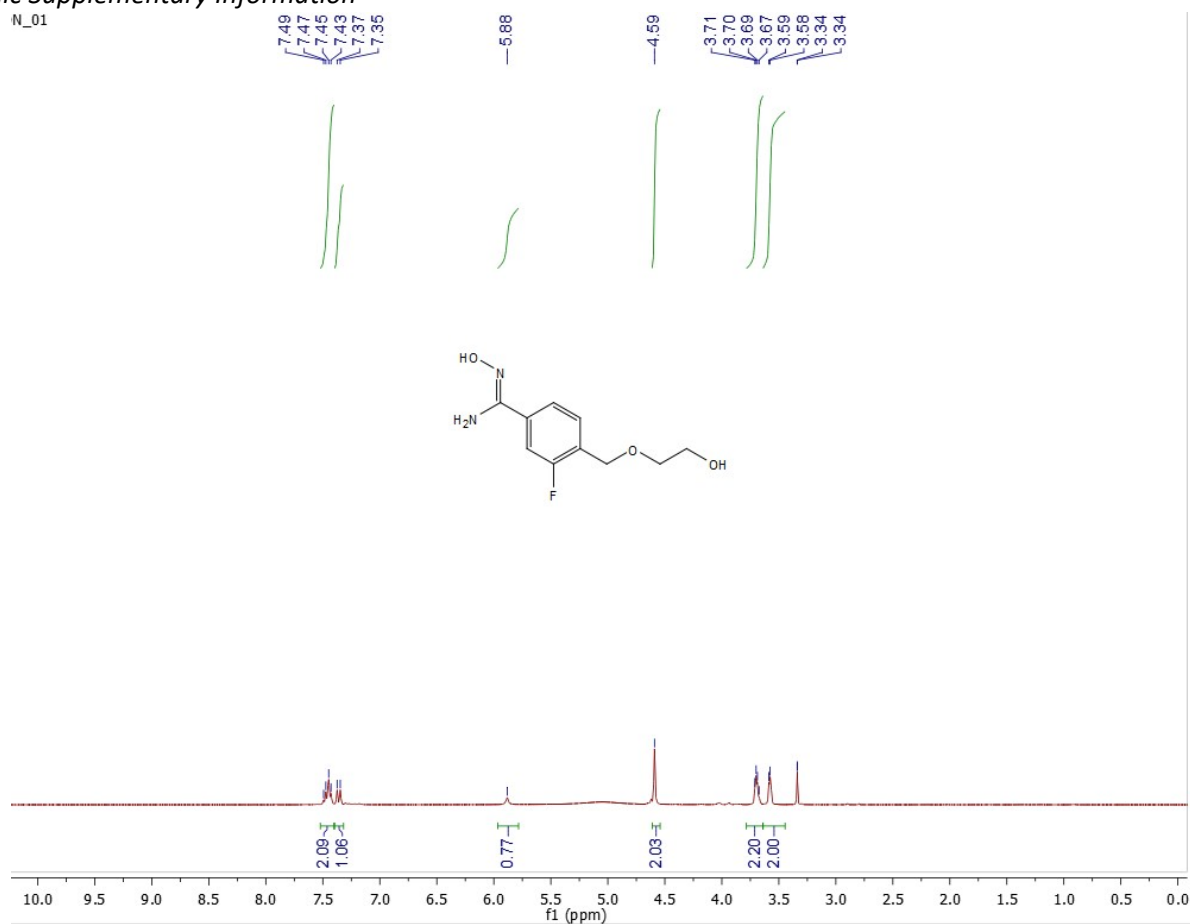

N\_01

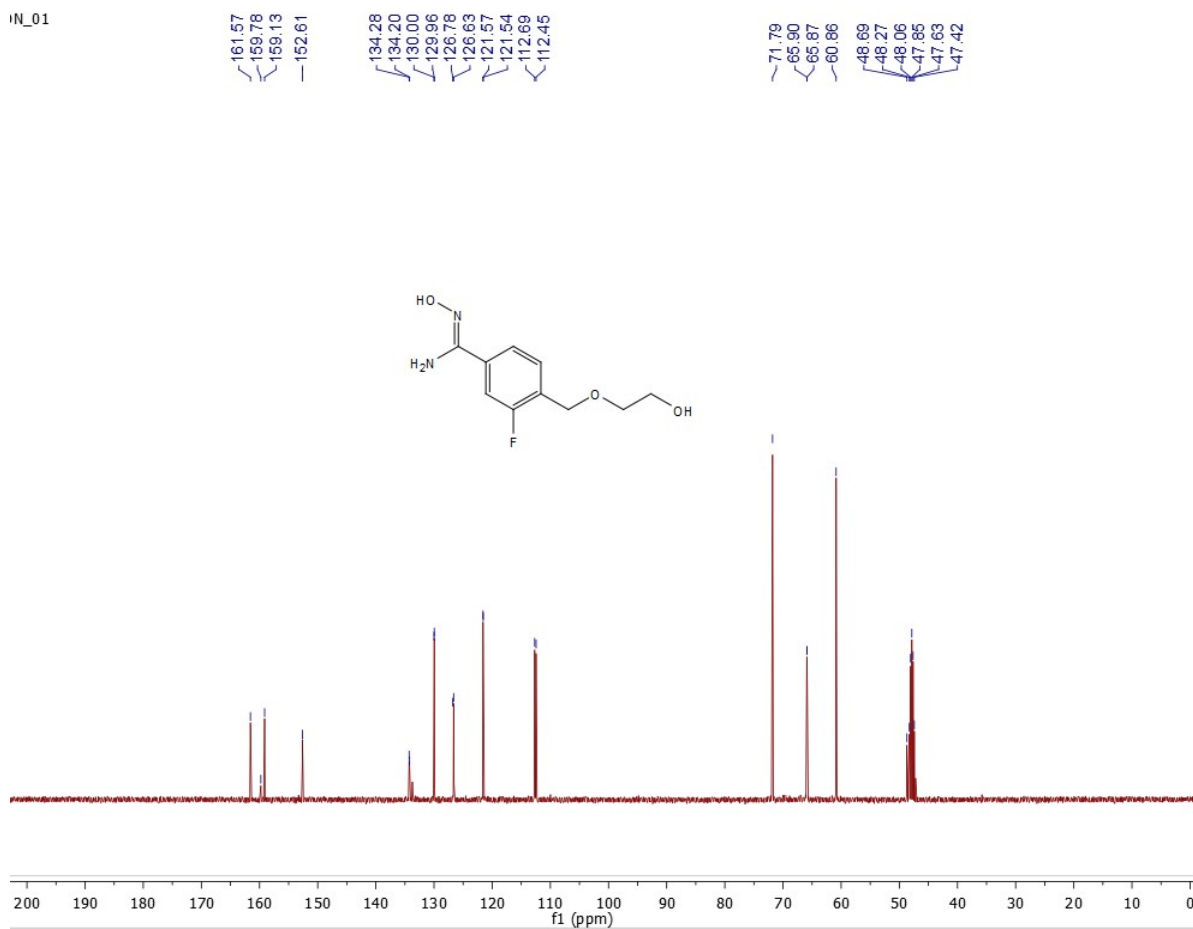

$^1\text{H}$  NMR and  $^{13}\text{C}$  NMR of **8a**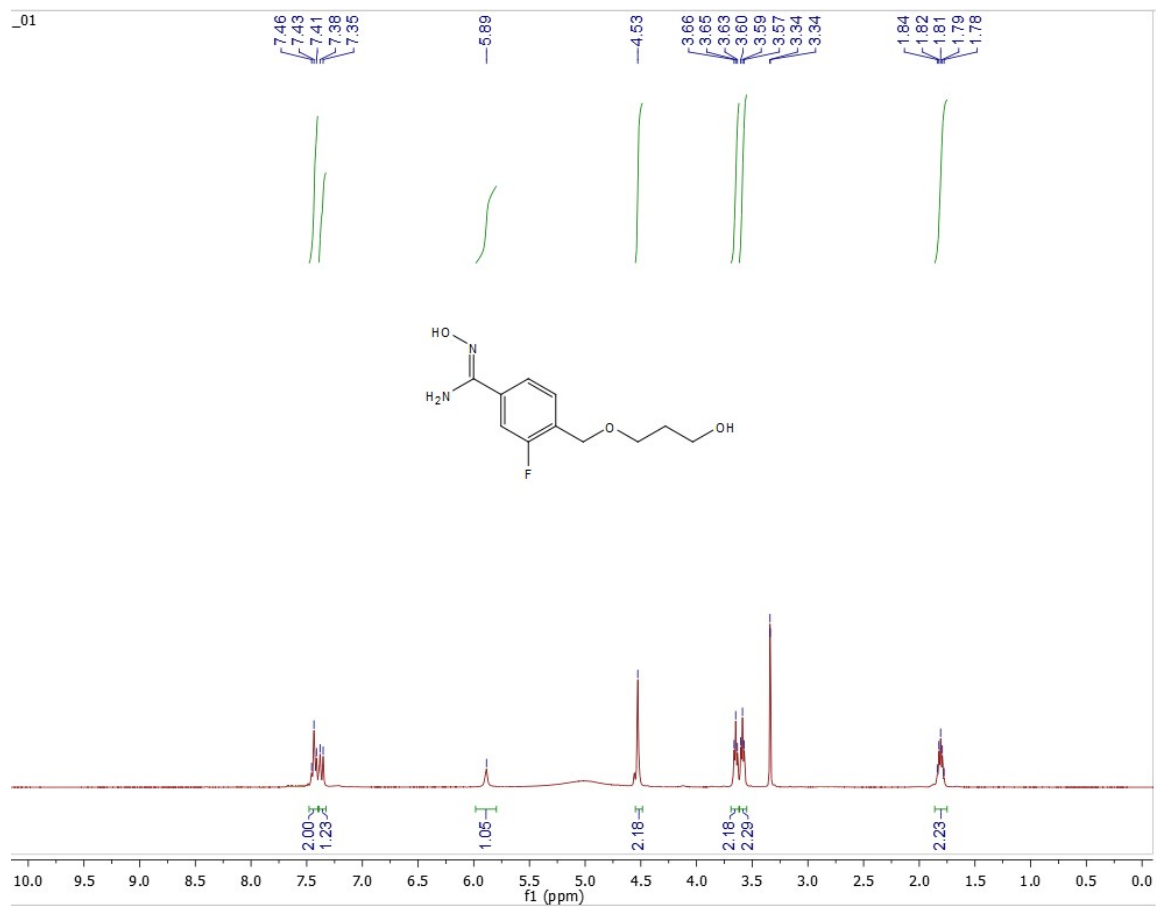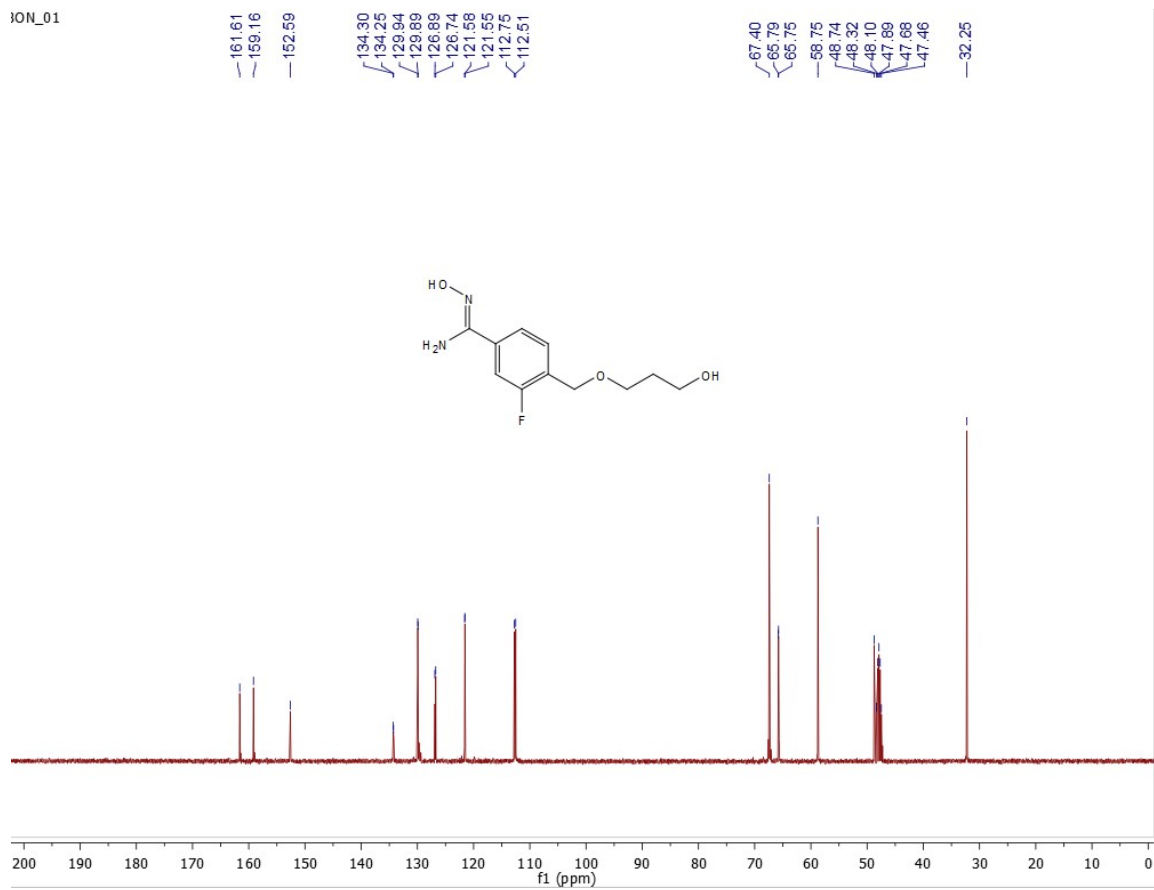

$^1\text{H}$  NMR and  $^{13}\text{C}$  NMR of **8b**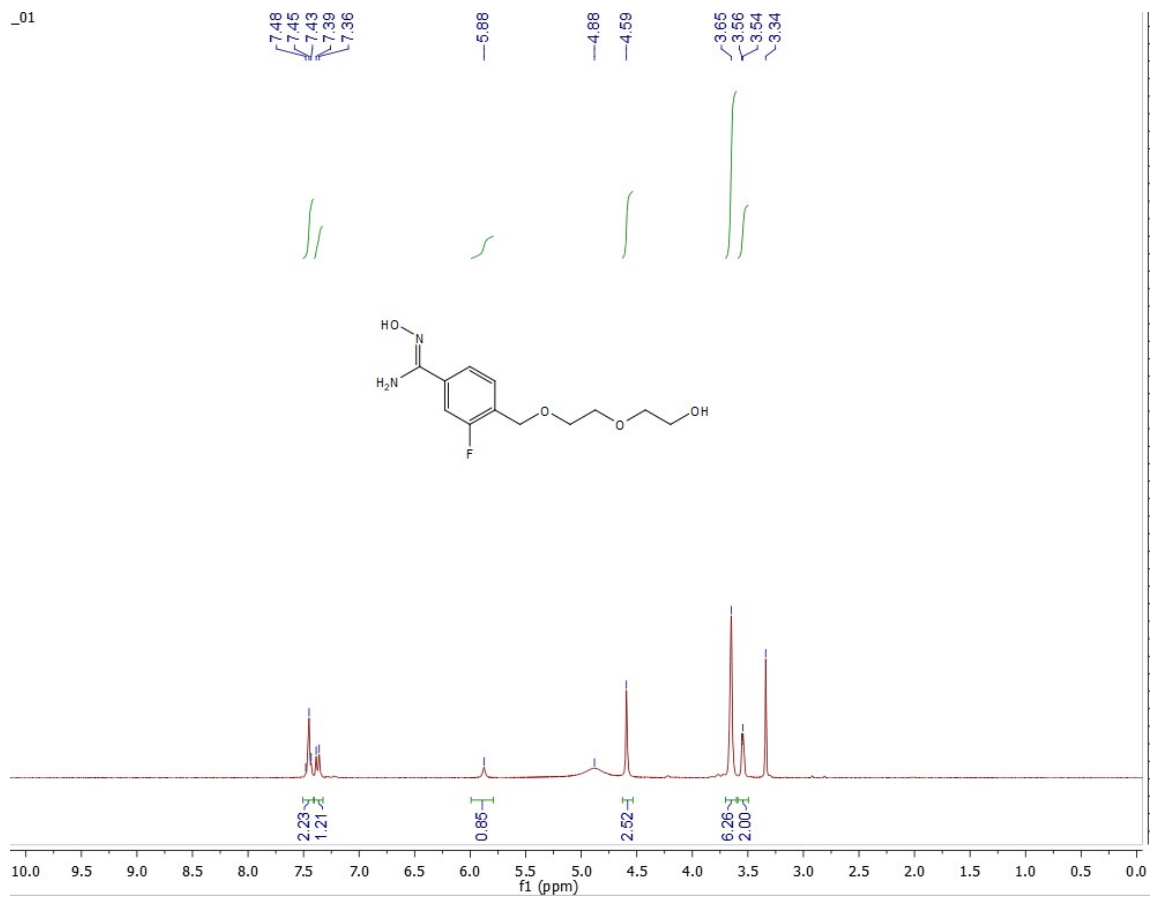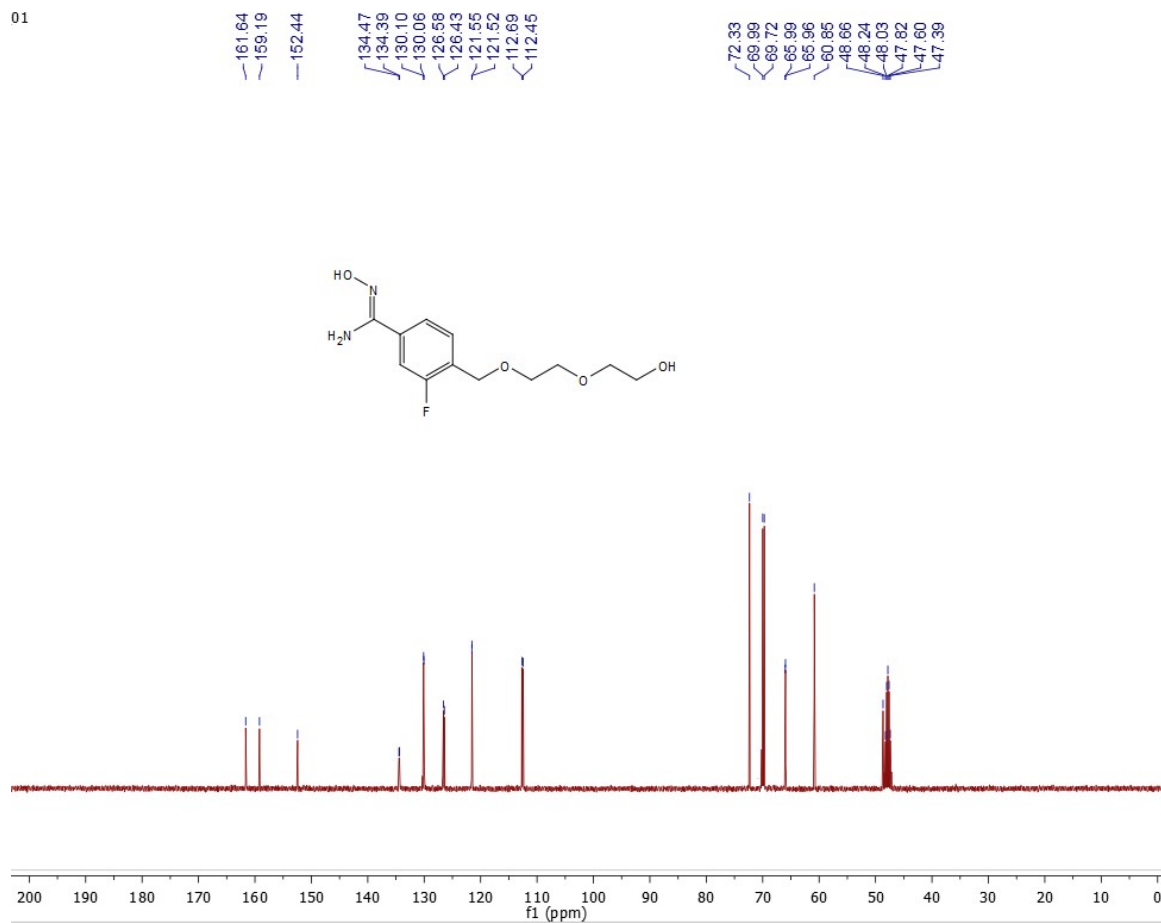

$^1\text{H}$  NMR and  $^{13}\text{C}$  NMR of **8c**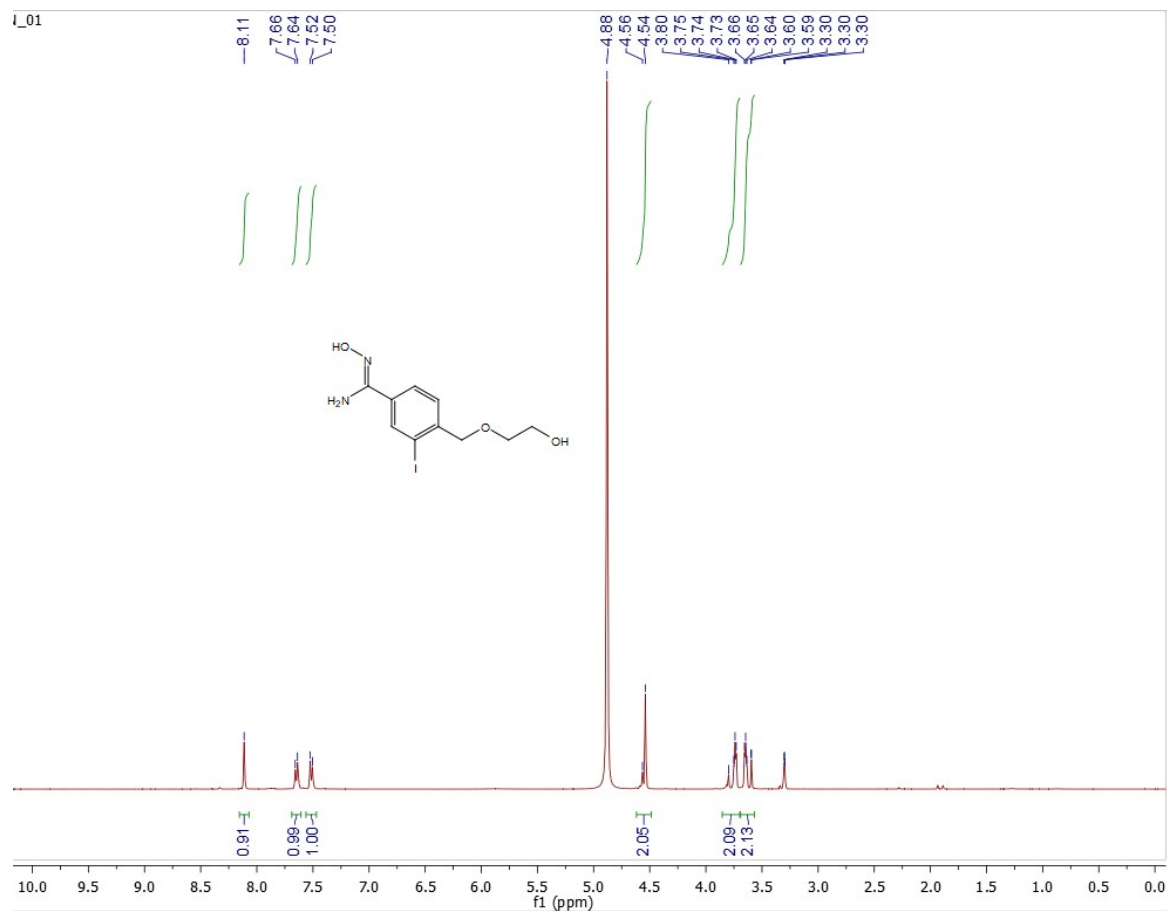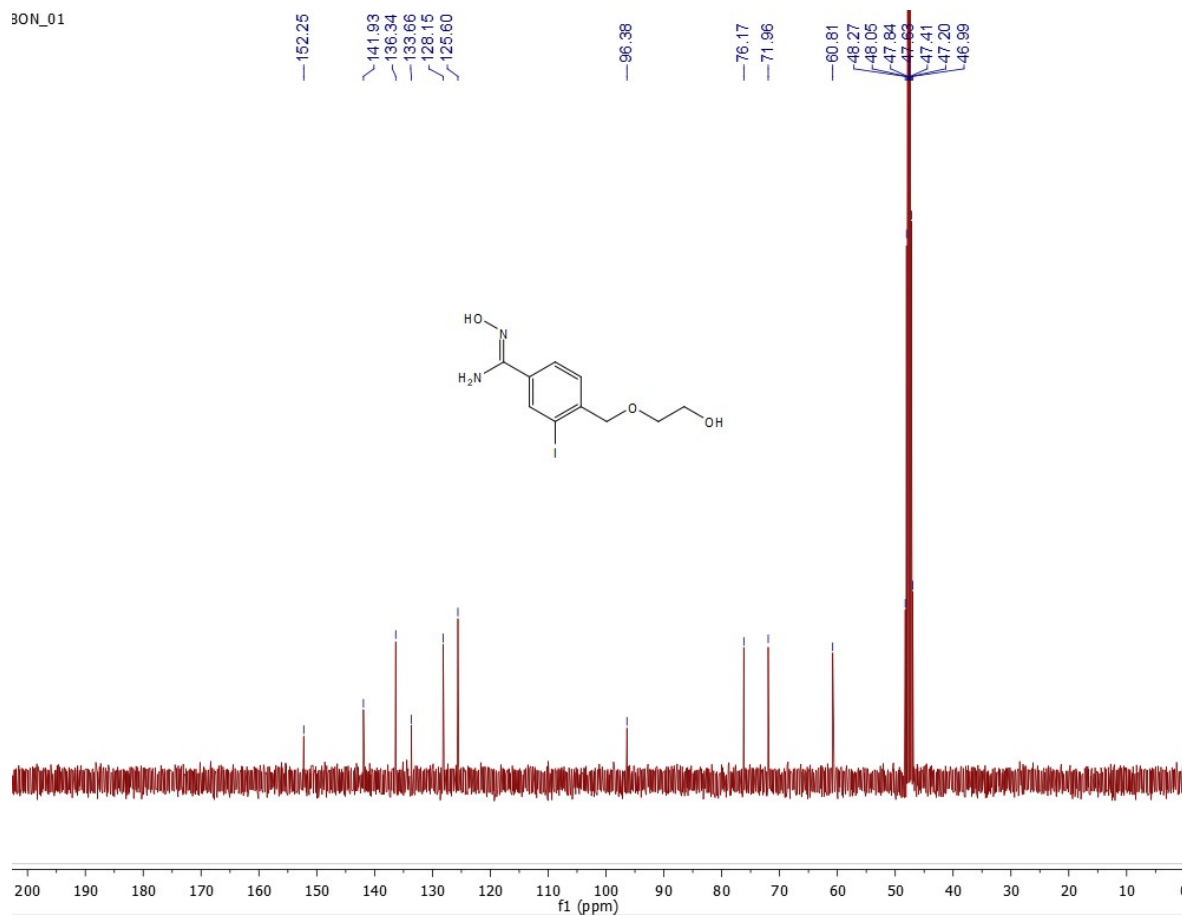

$^1\text{H}$  NMR and  $^{13}\text{C}$  NMR of **8d**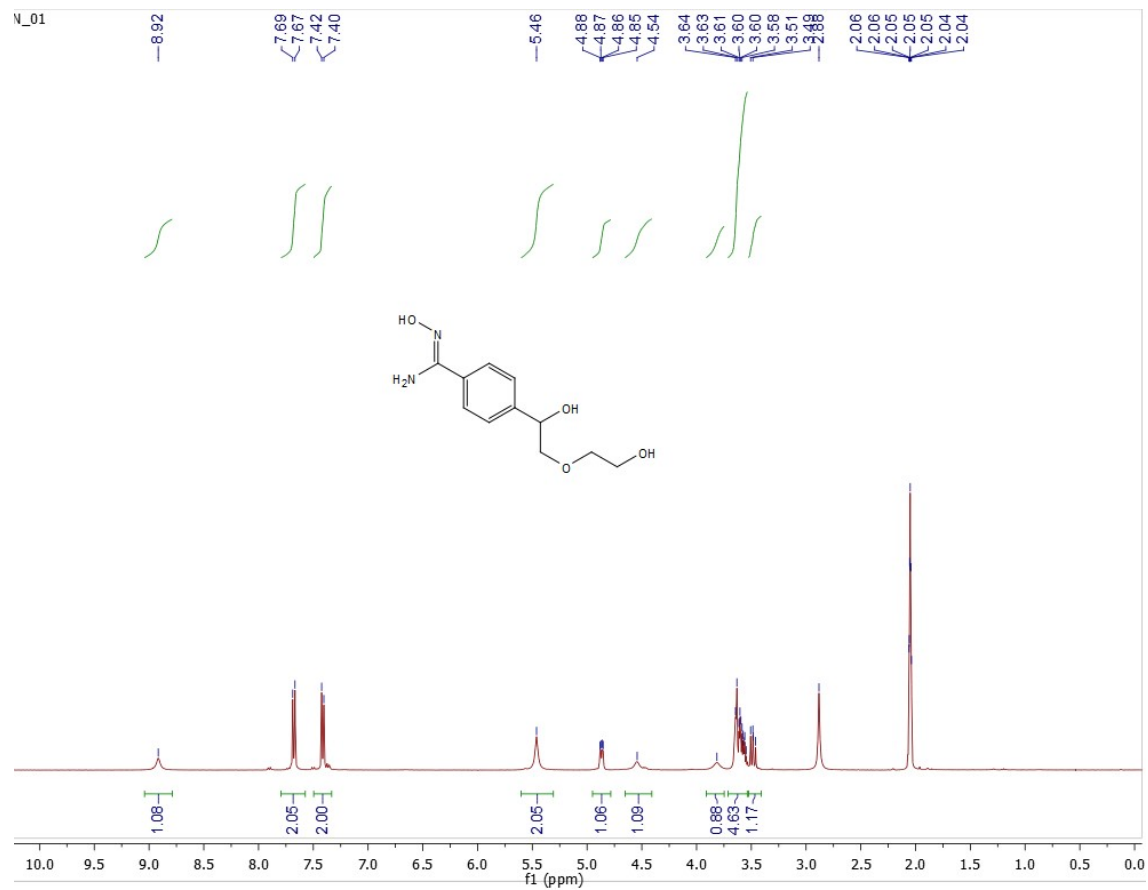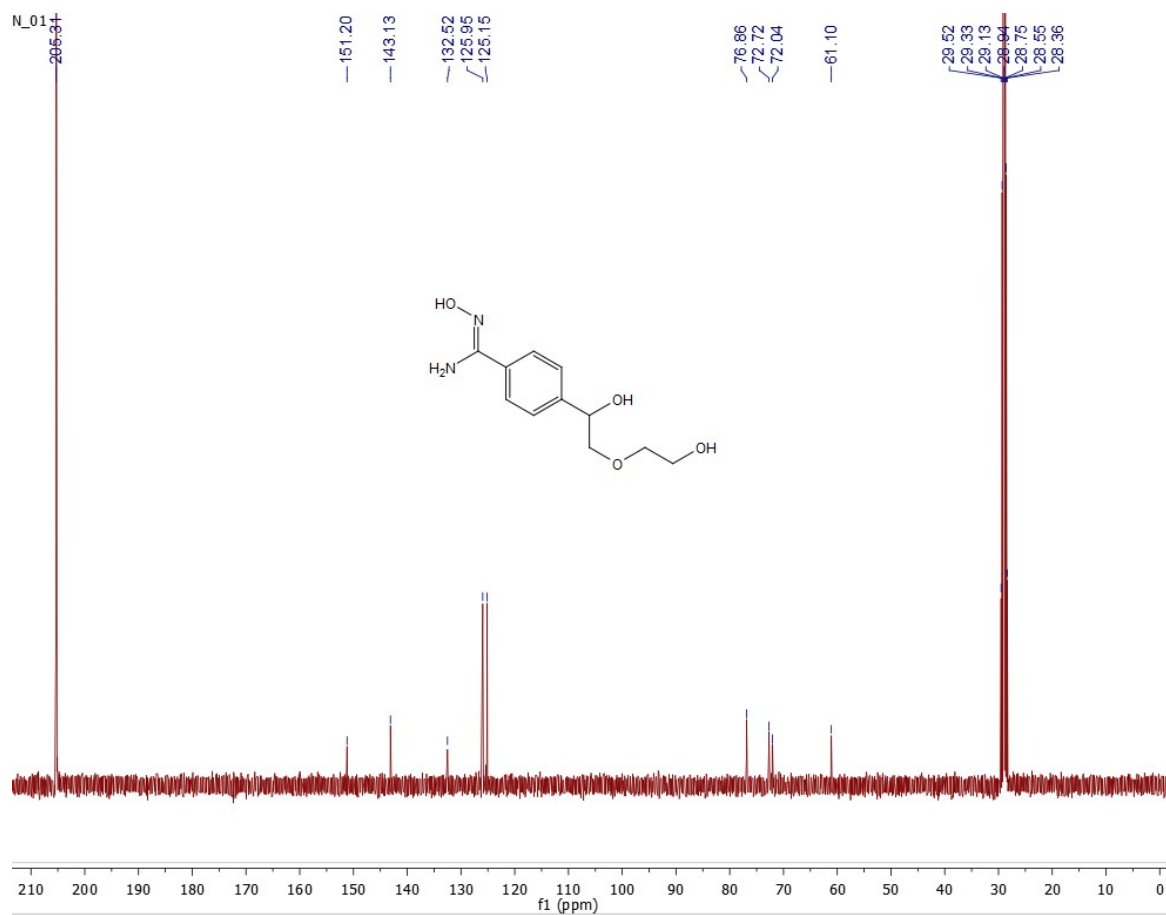

$^1\text{H}$  NMR and  $^{13}\text{C}$  NMR of **8e**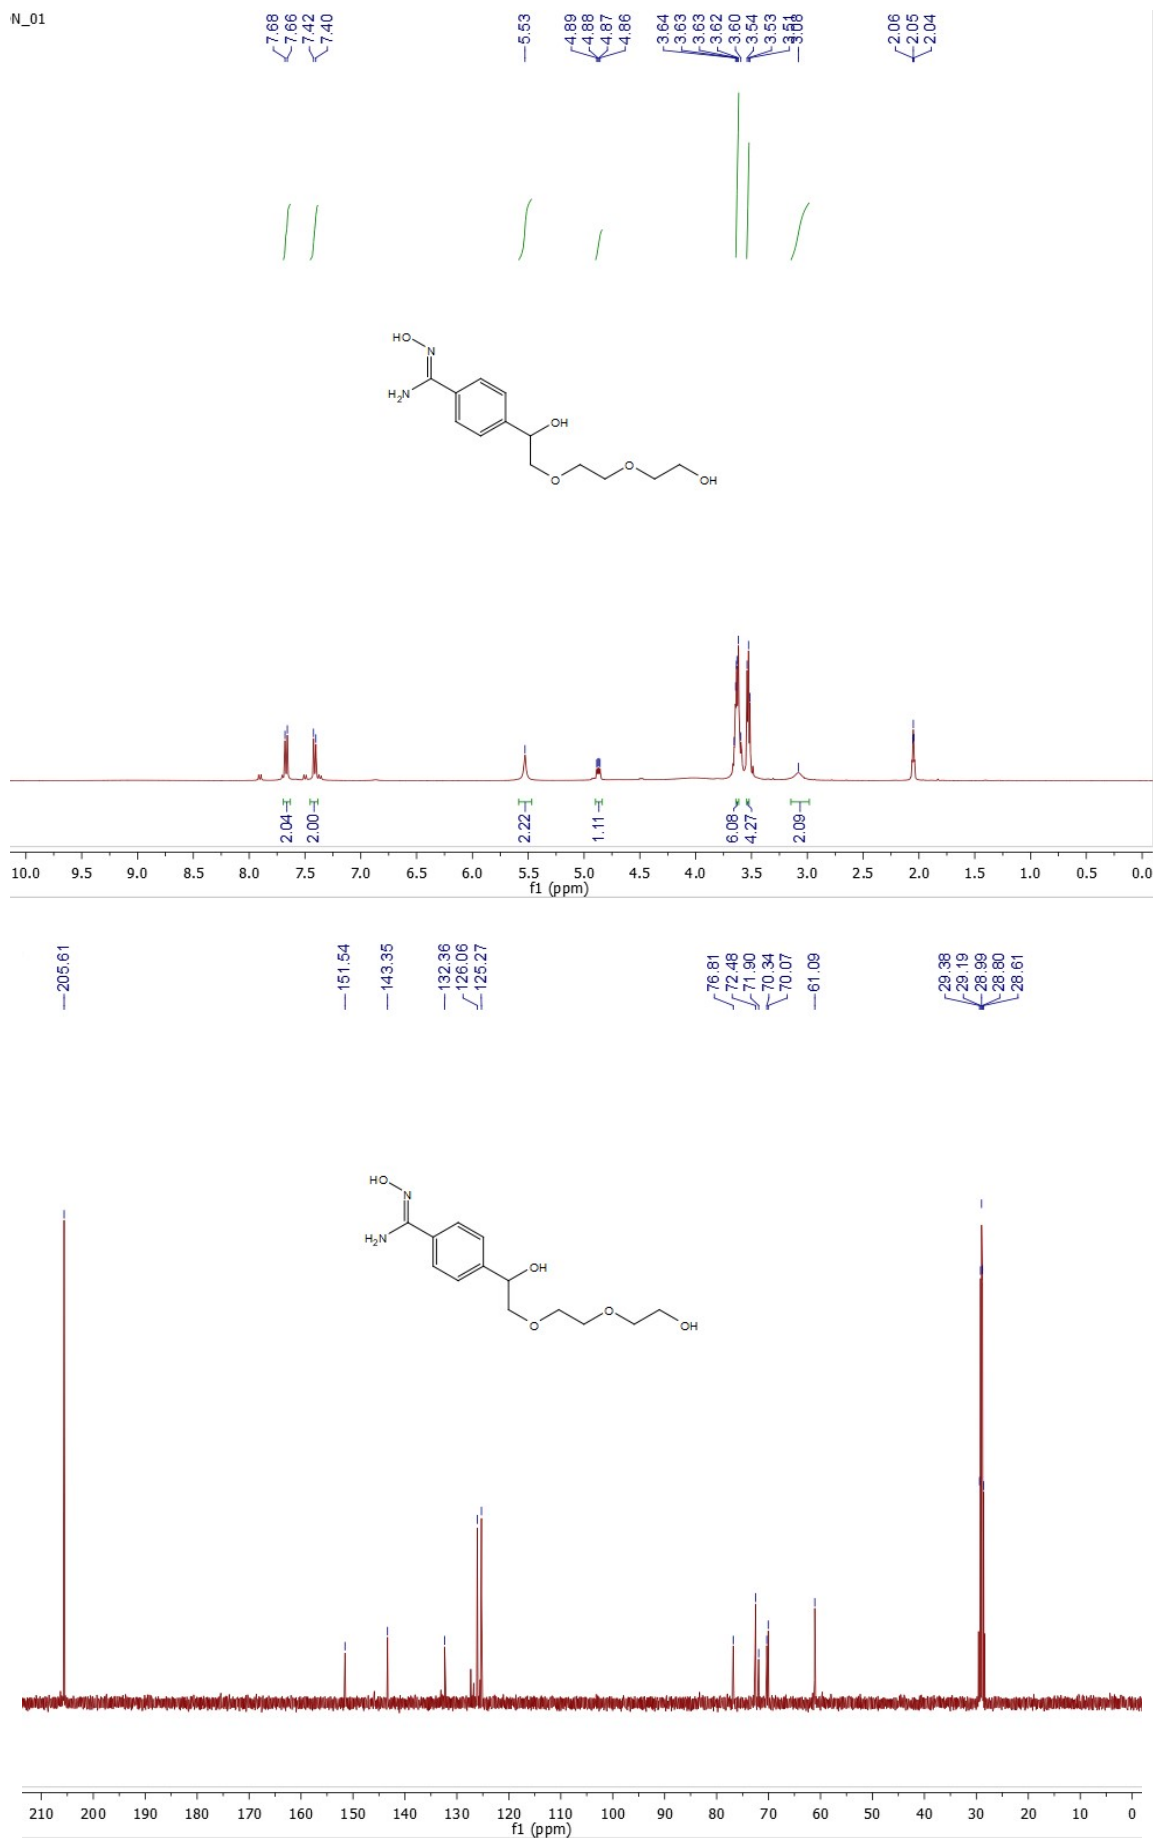





<sup>1</sup>H NMR and <sup>13</sup>C NMR of **8g**

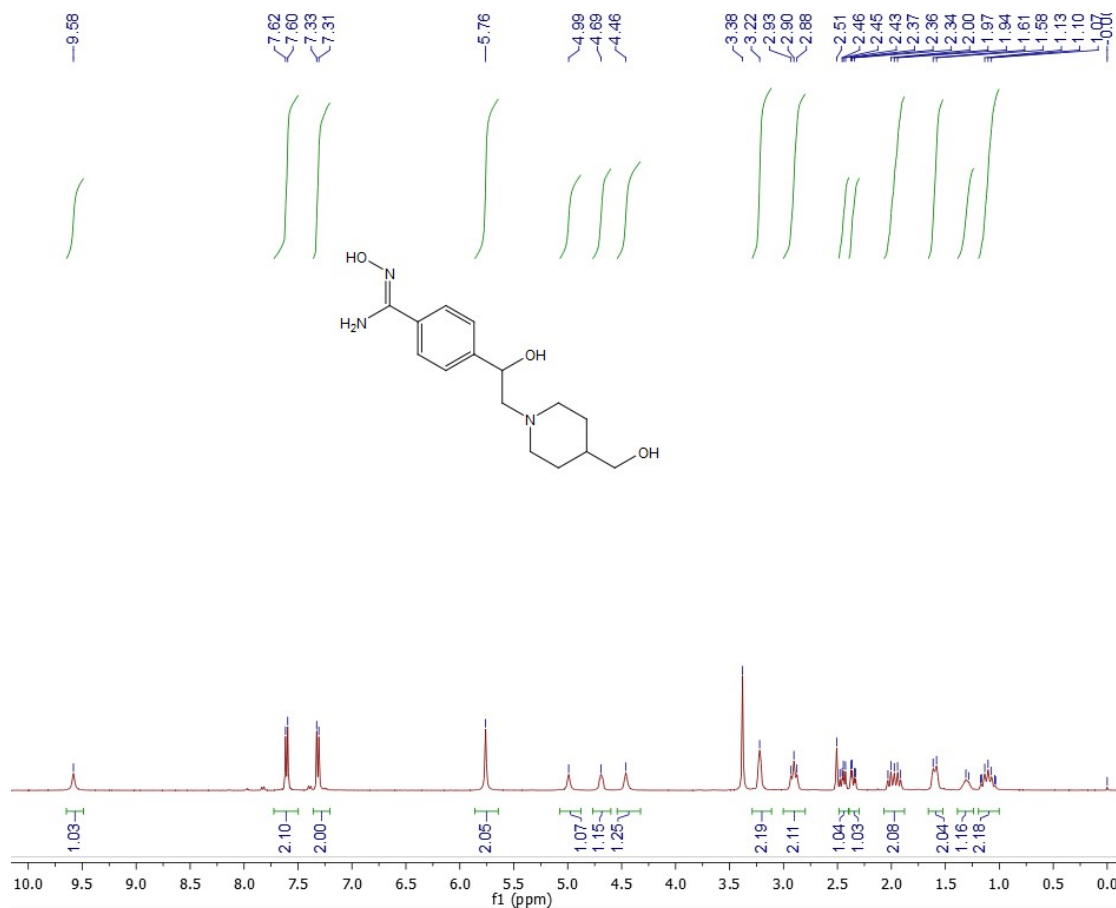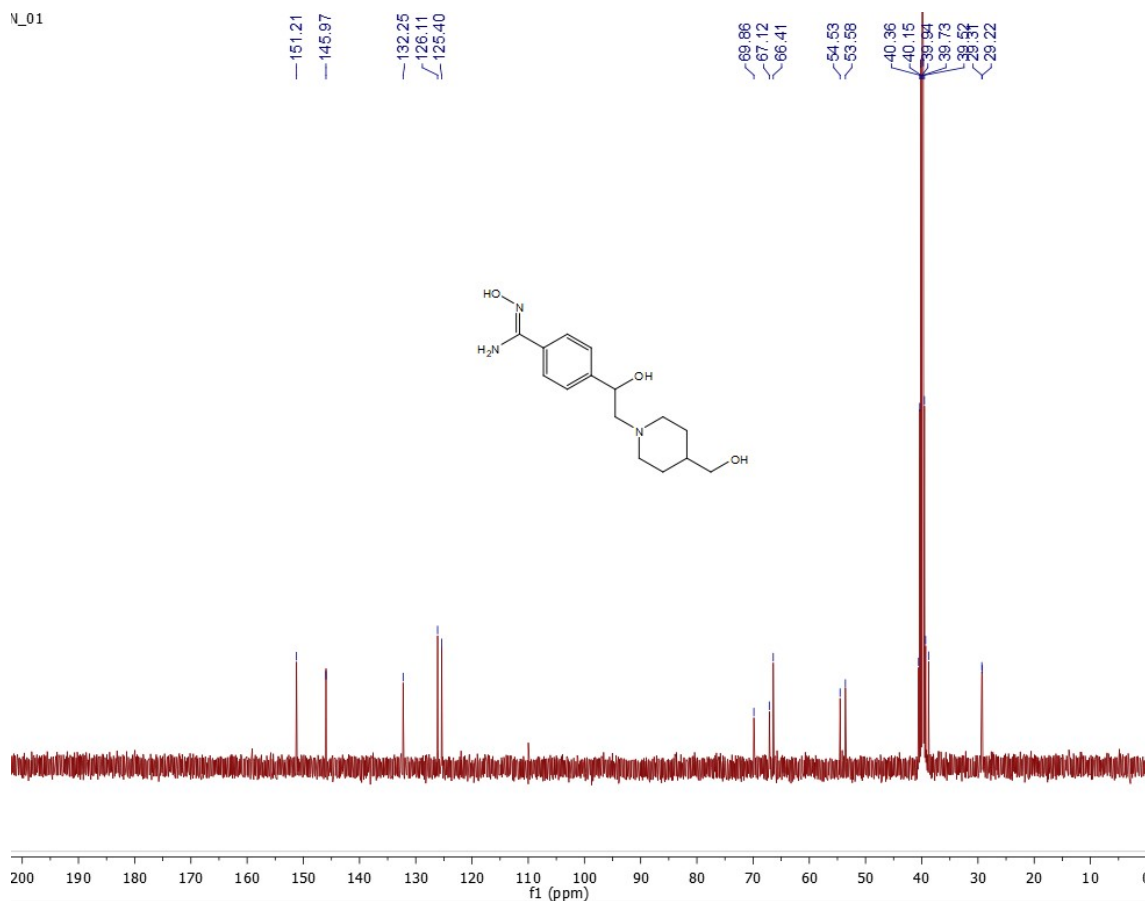

$^1\text{H}$  NMR and  $^{13}\text{C}$  NMR of **8h**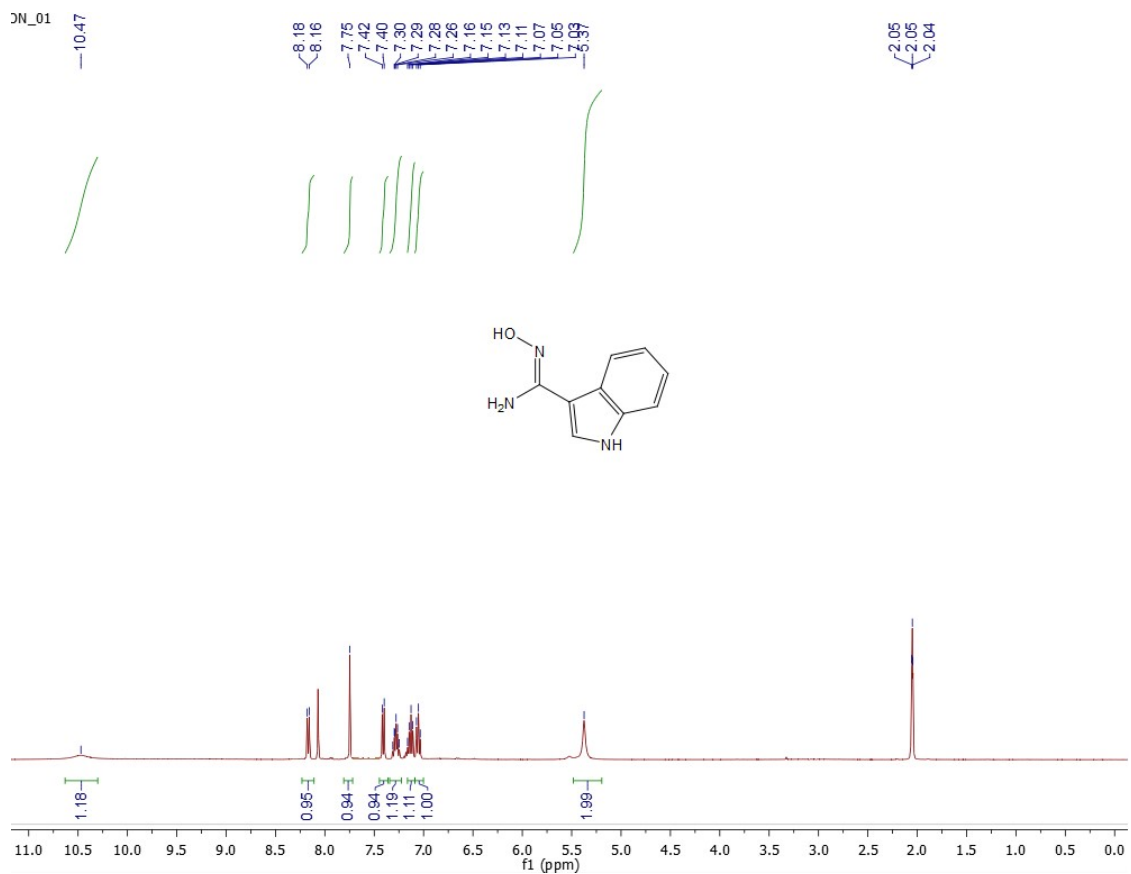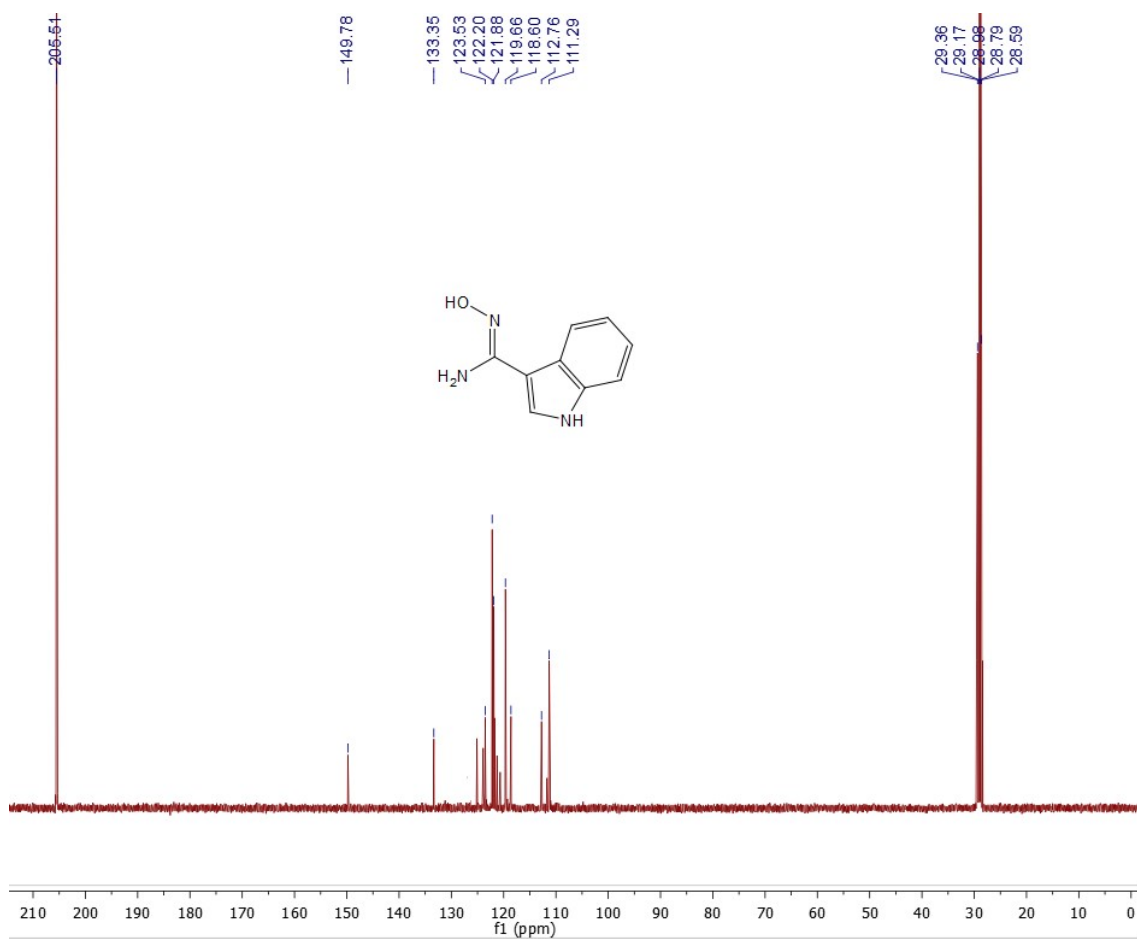

$^1\text{H}$  NMR and  $^{13}\text{C}$  NMR of **11a**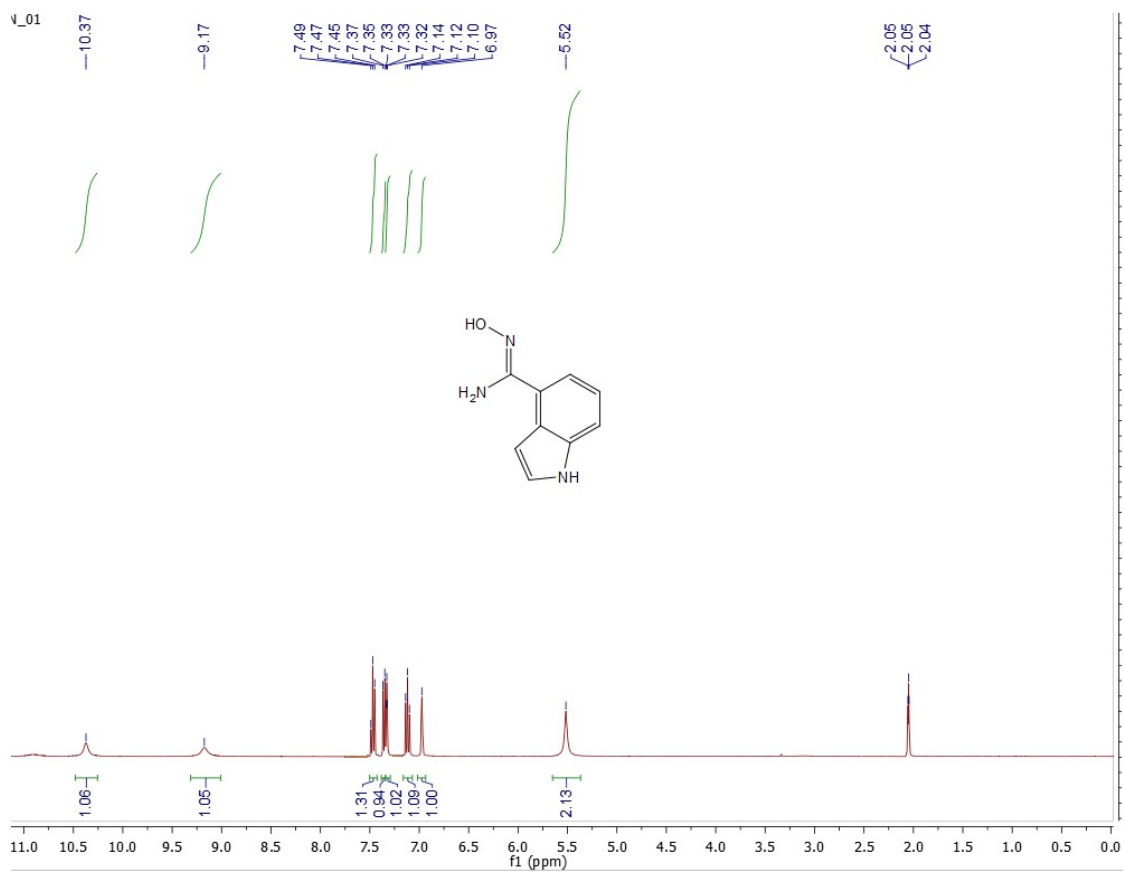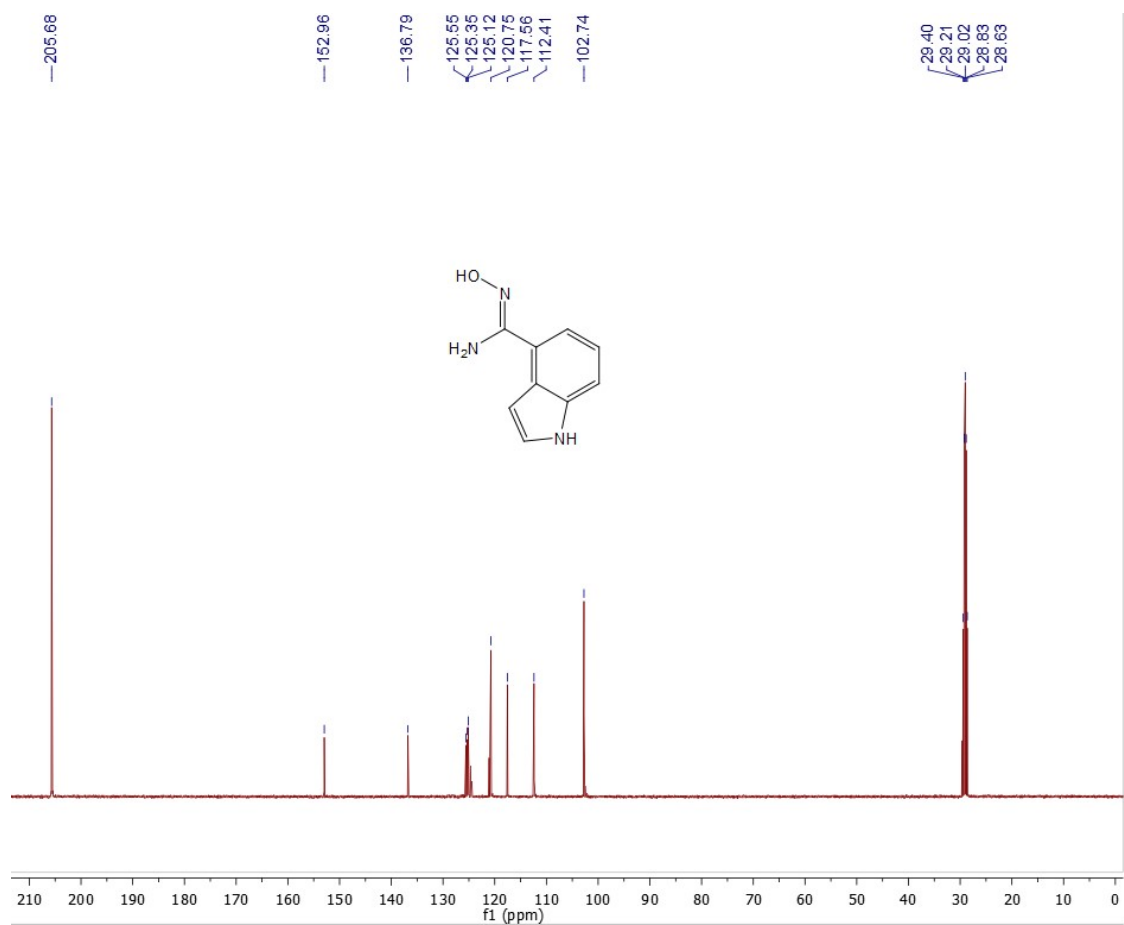

<sup>1</sup>H NMR and <sup>13</sup>C NMR of **11b**

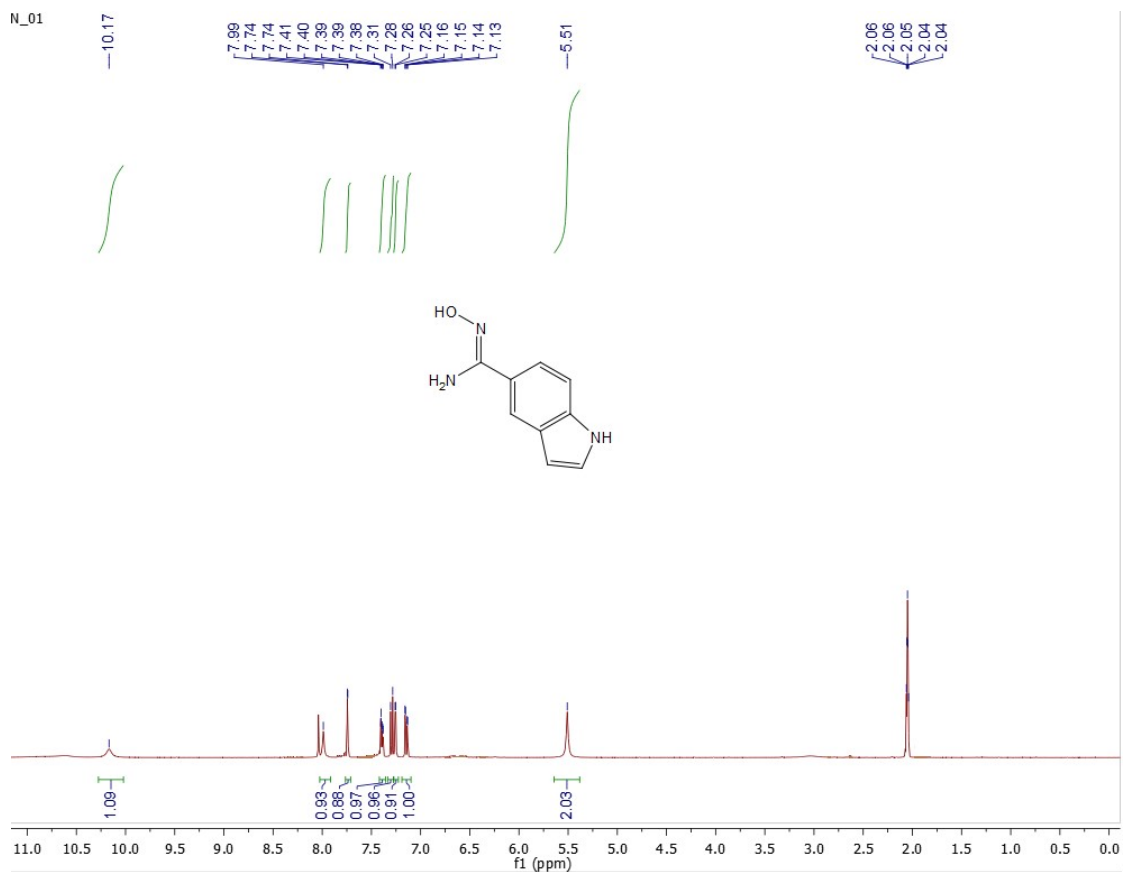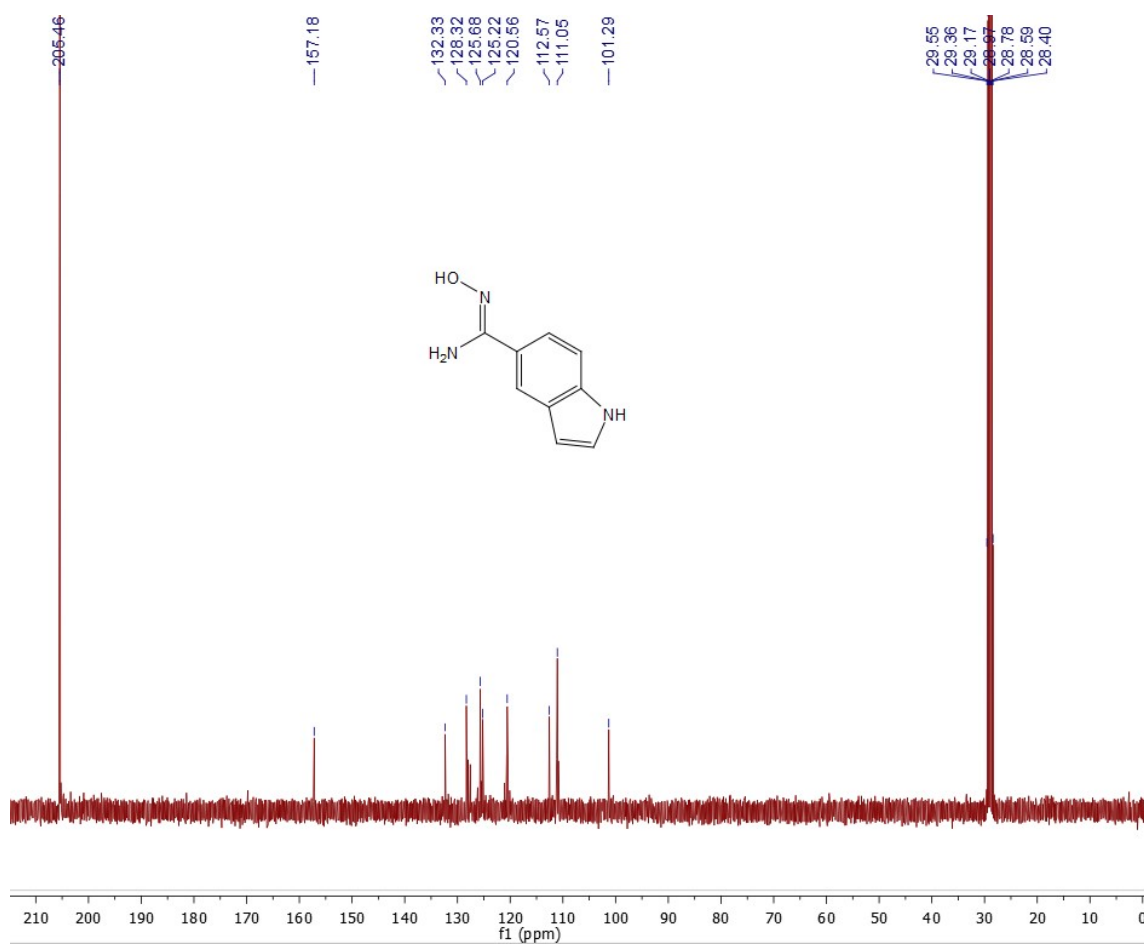

$^1\text{H}$  NMR and  $^{13}\text{C}$  NMR of **11c**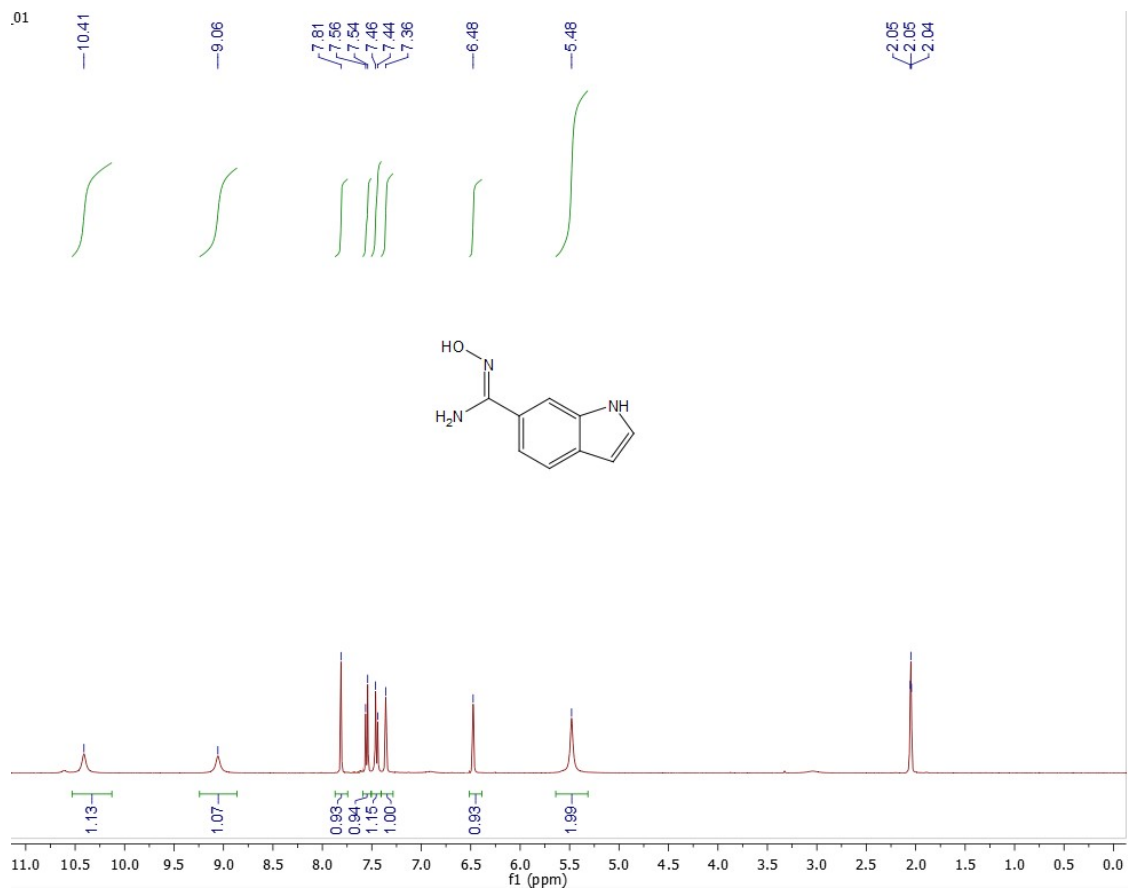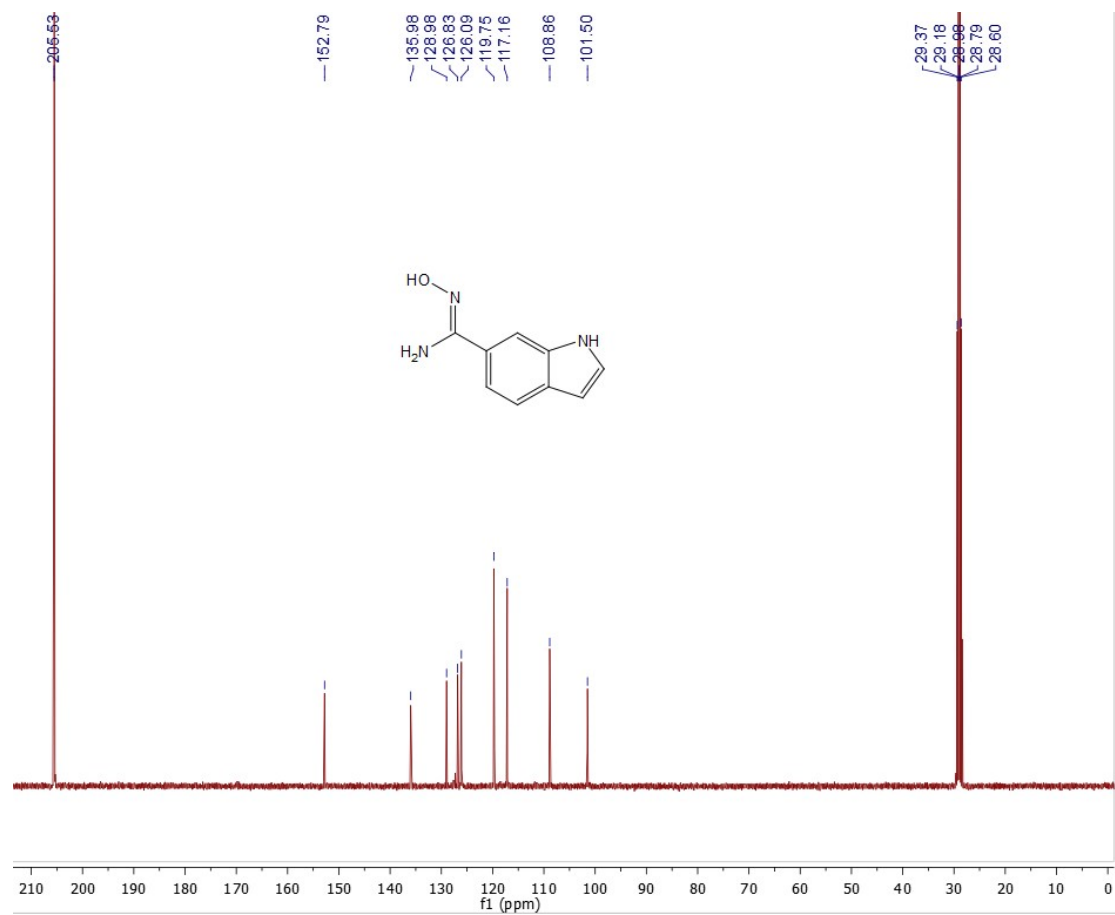

$^1\text{H}$  NMR and  $^{13}\text{C}$  NMR of **11d**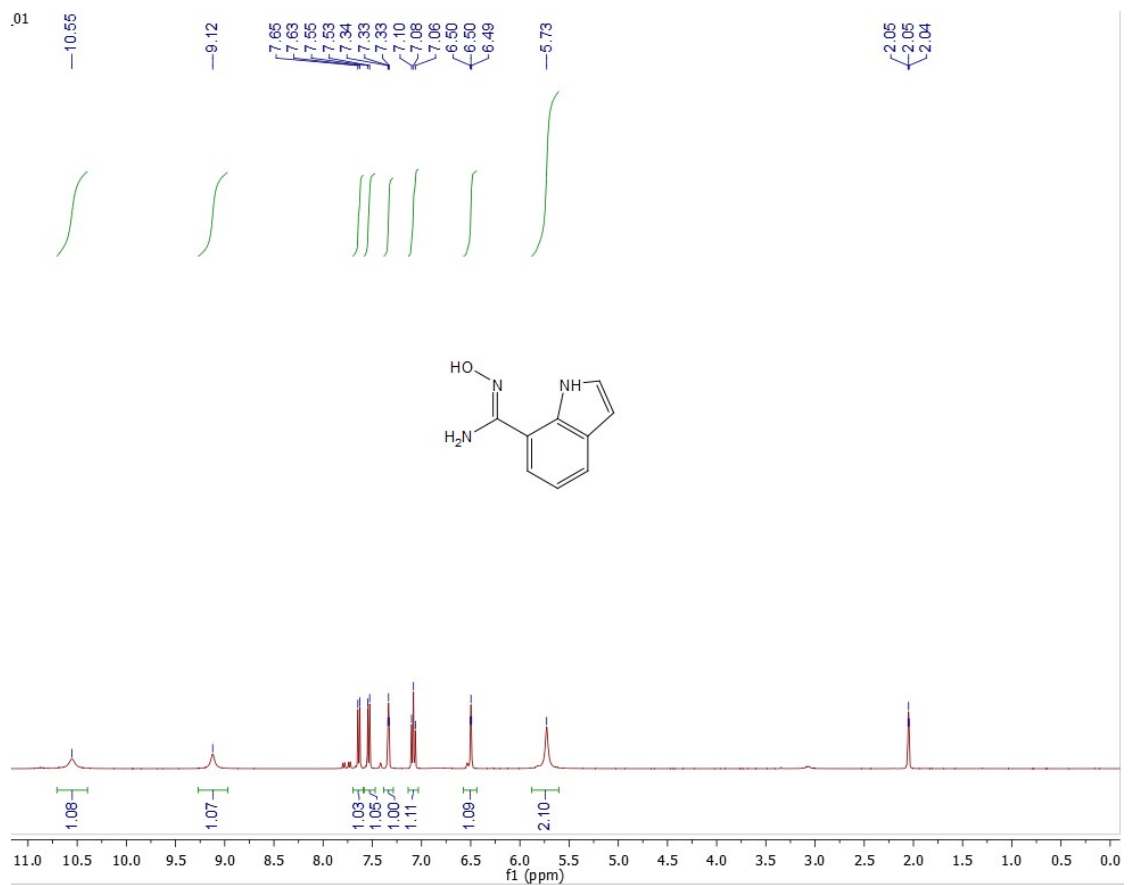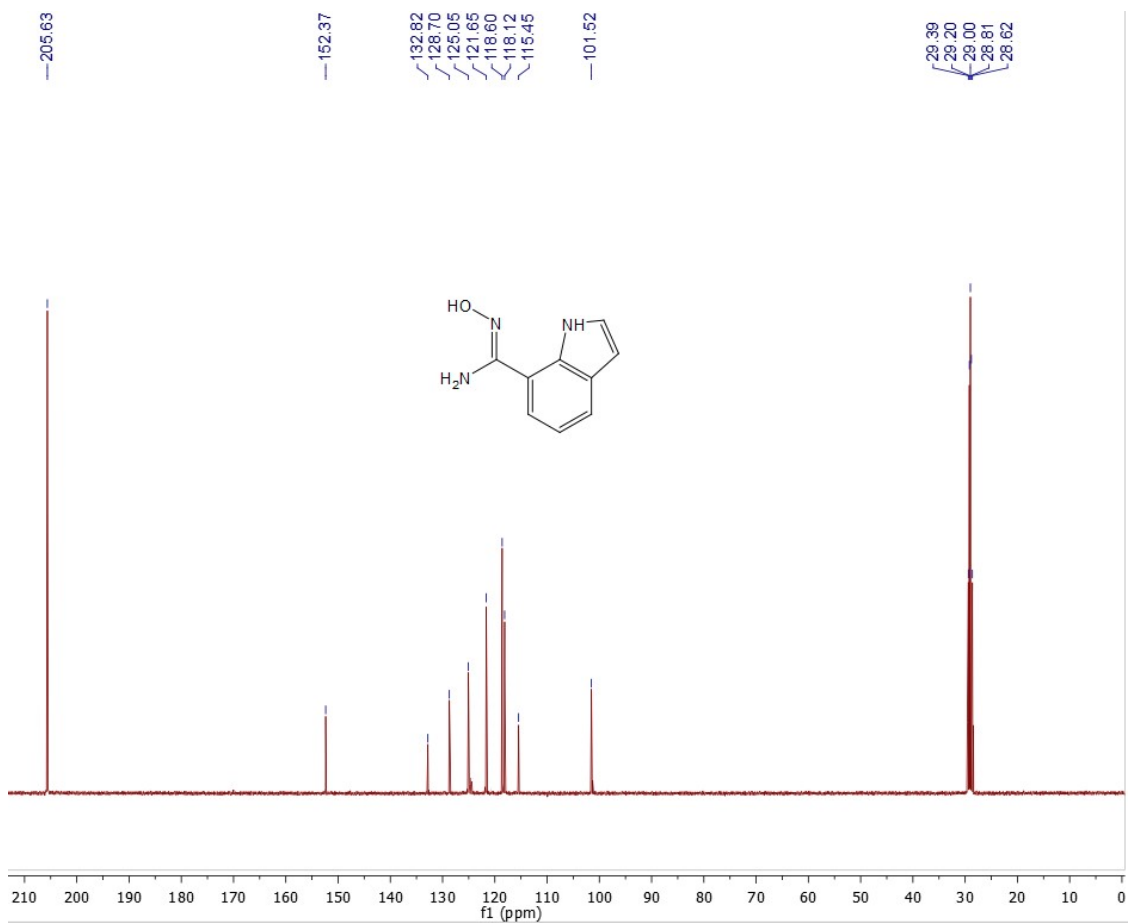

$^1\text{H}$  NMR and  $^{13}\text{C}$  NMR of **11e**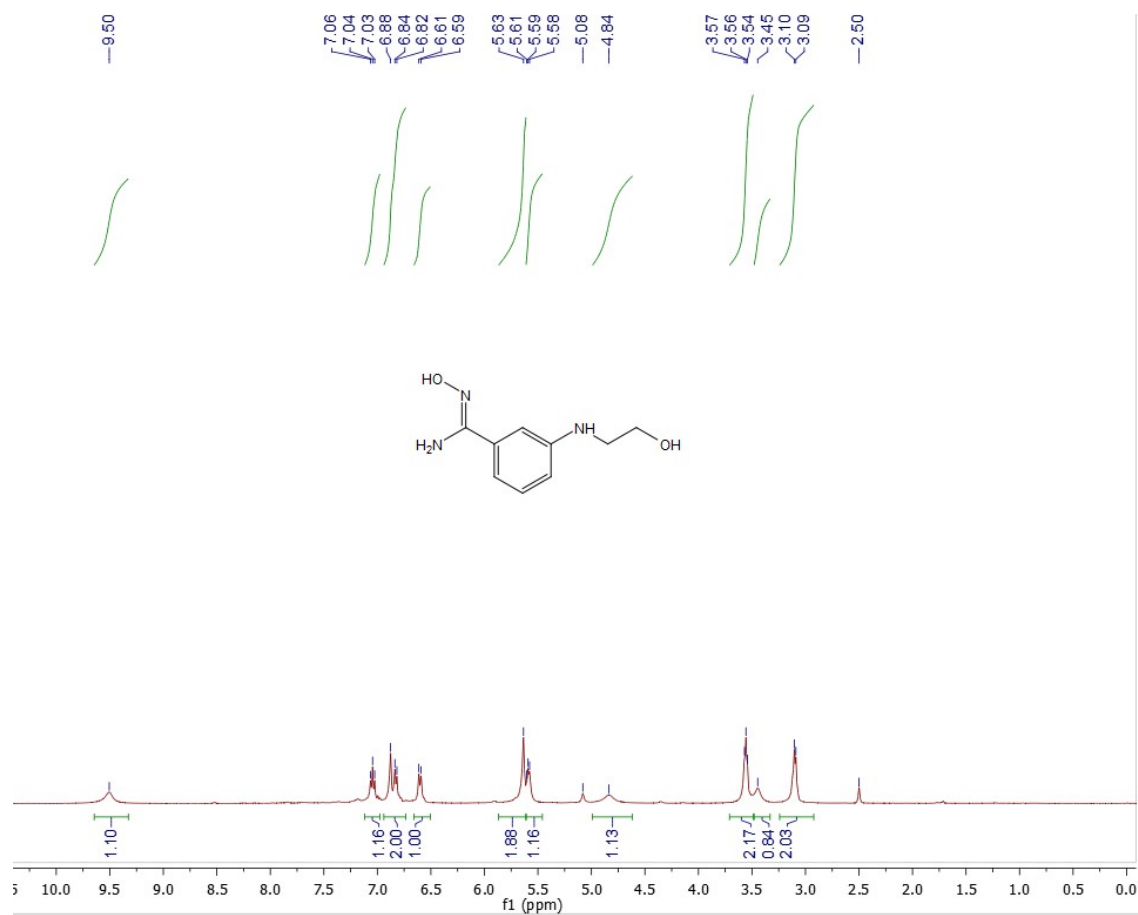

N\_01

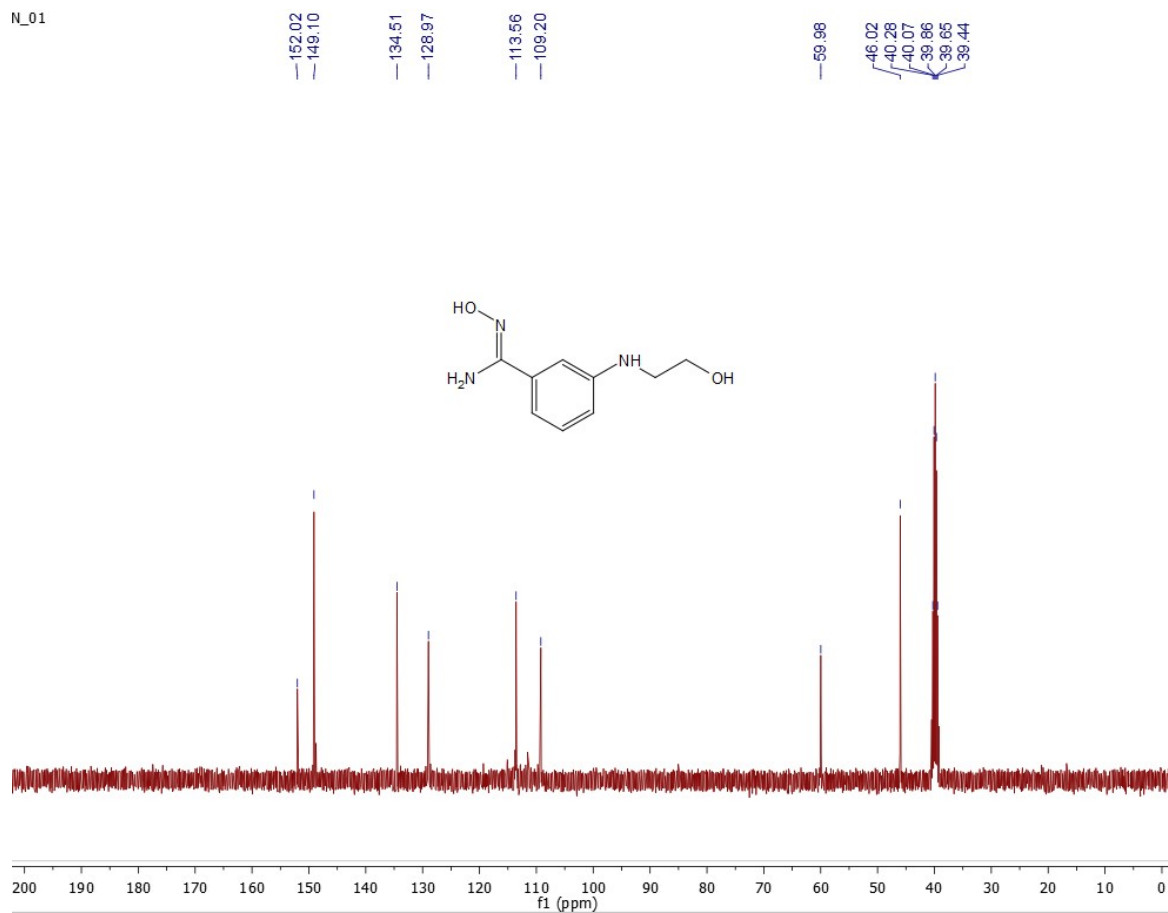

$^1\text{H}$  NMR and  $^{13}\text{C}$  NMR of **14**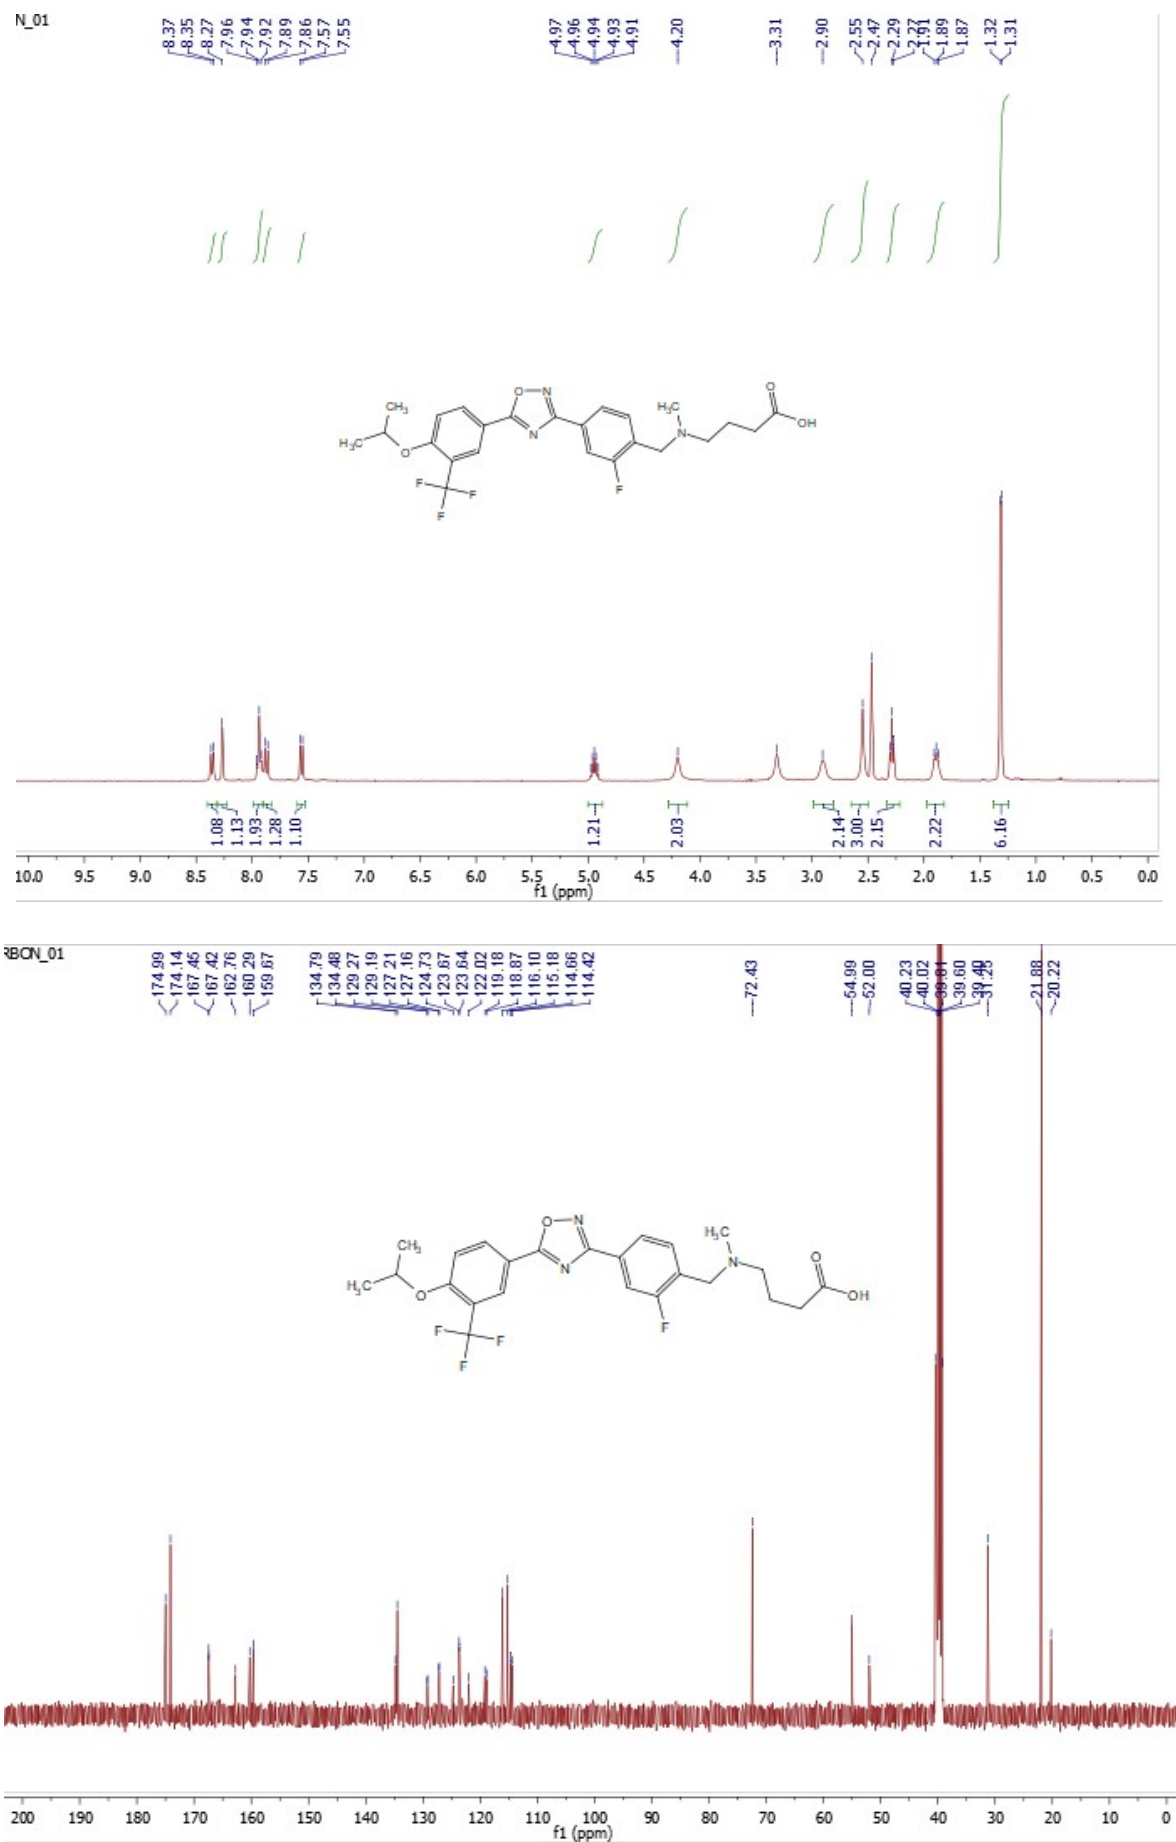



$^1\text{H}$  NMR and  $^{13}\text{C}$  NMR of **7a**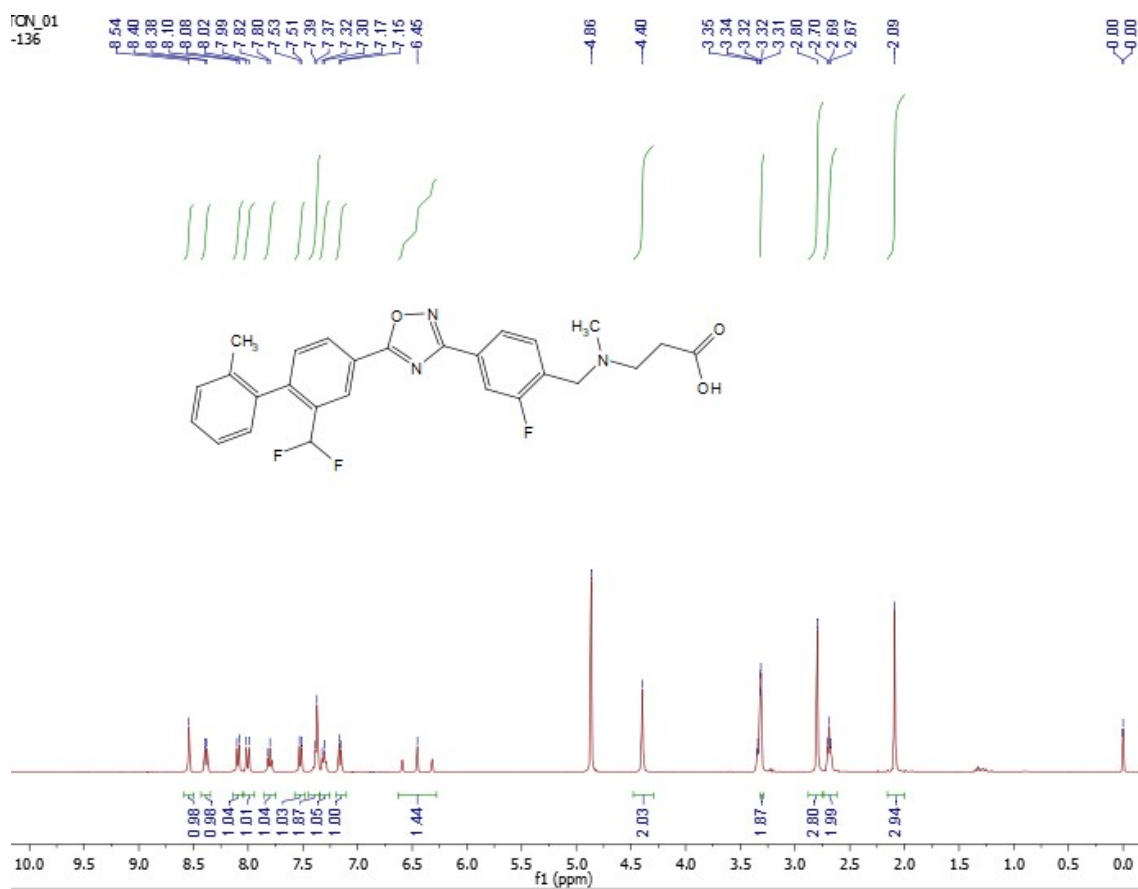

Electronic Supplementary Information

IRBON\_01  
73-137-CF

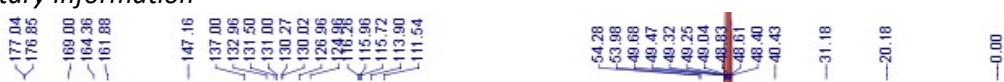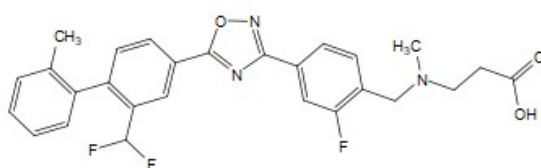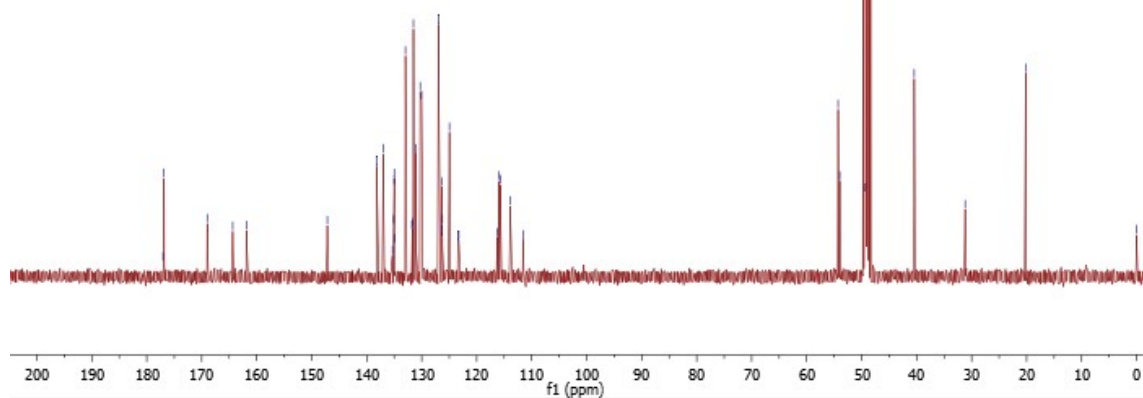

<sup>1</sup>H NMR and <sup>13</sup>C NMR of 7b

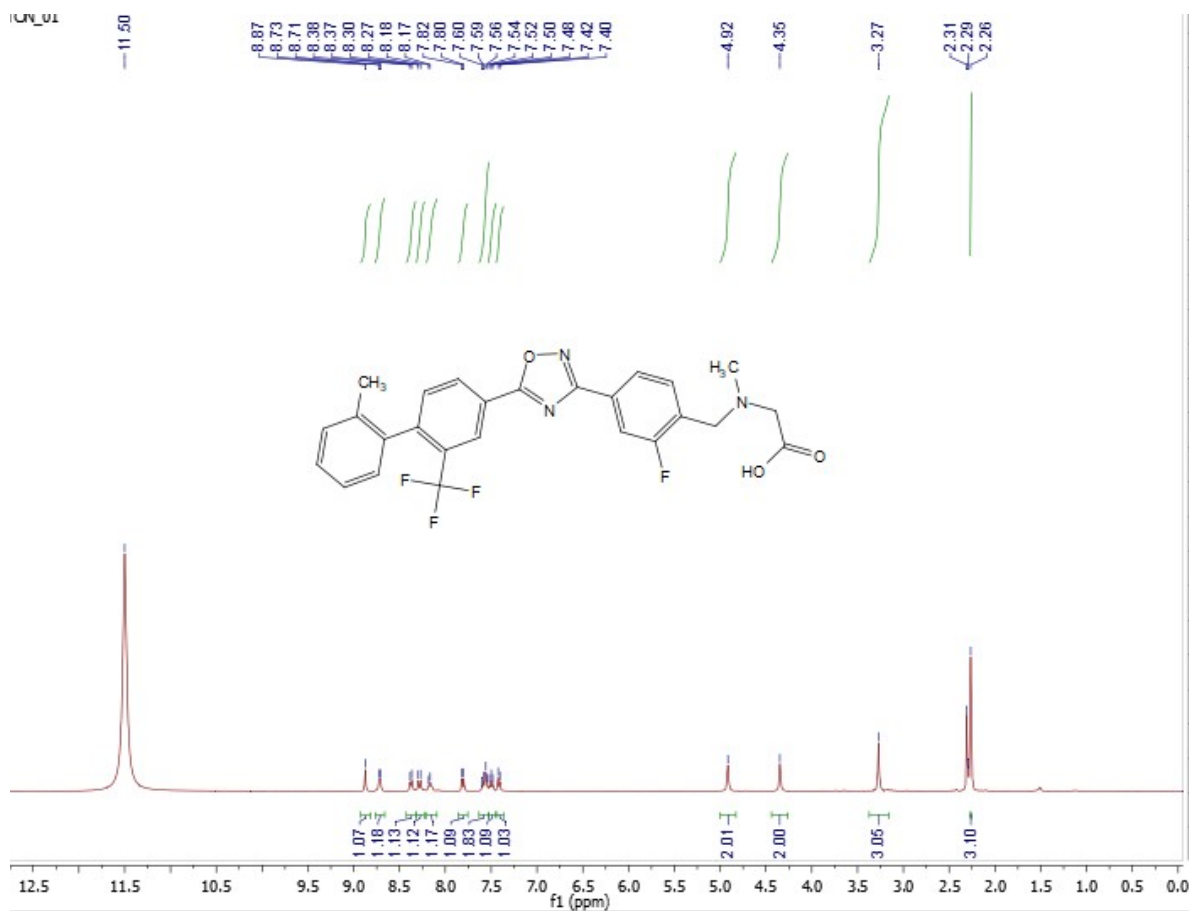

Electronic Supplementary Information

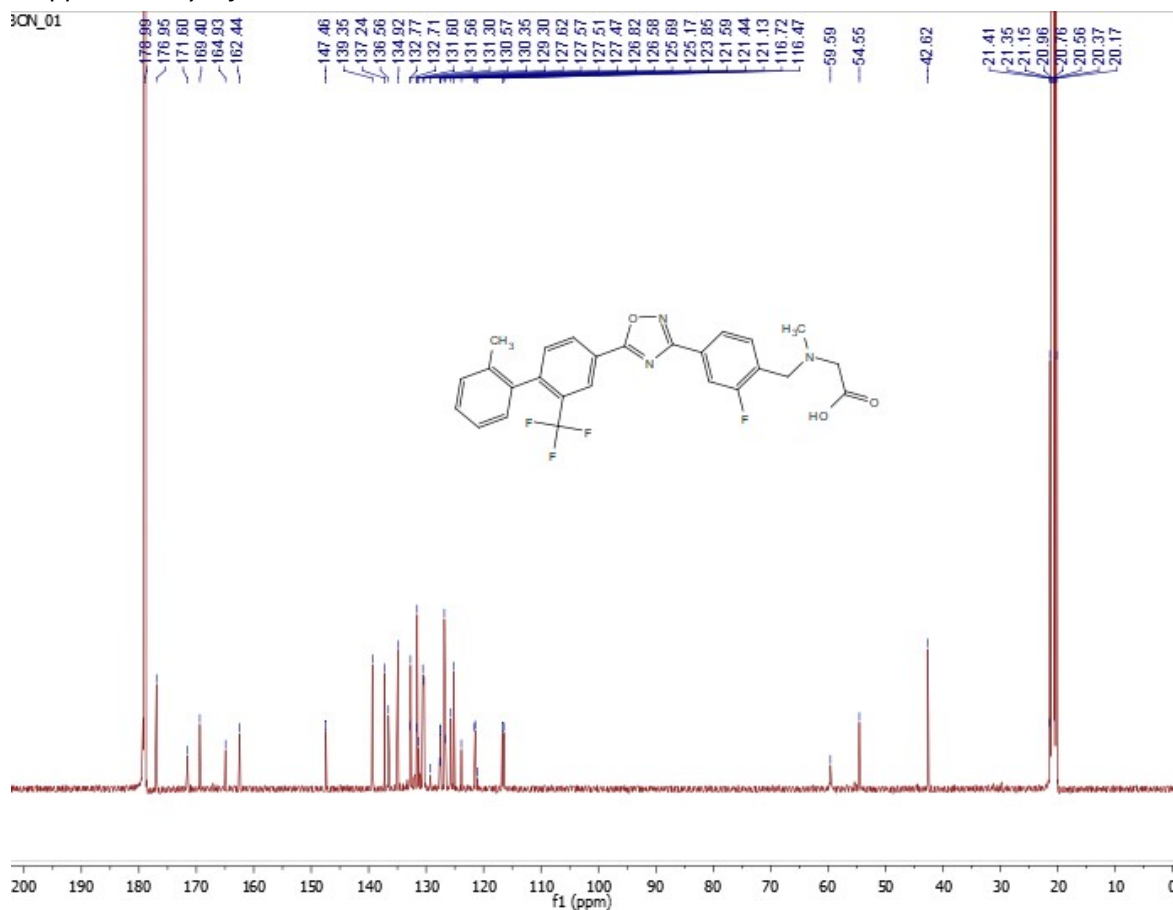

$^1\text{H}$  NMR and  $^{13}\text{C}$  NMR of 7c

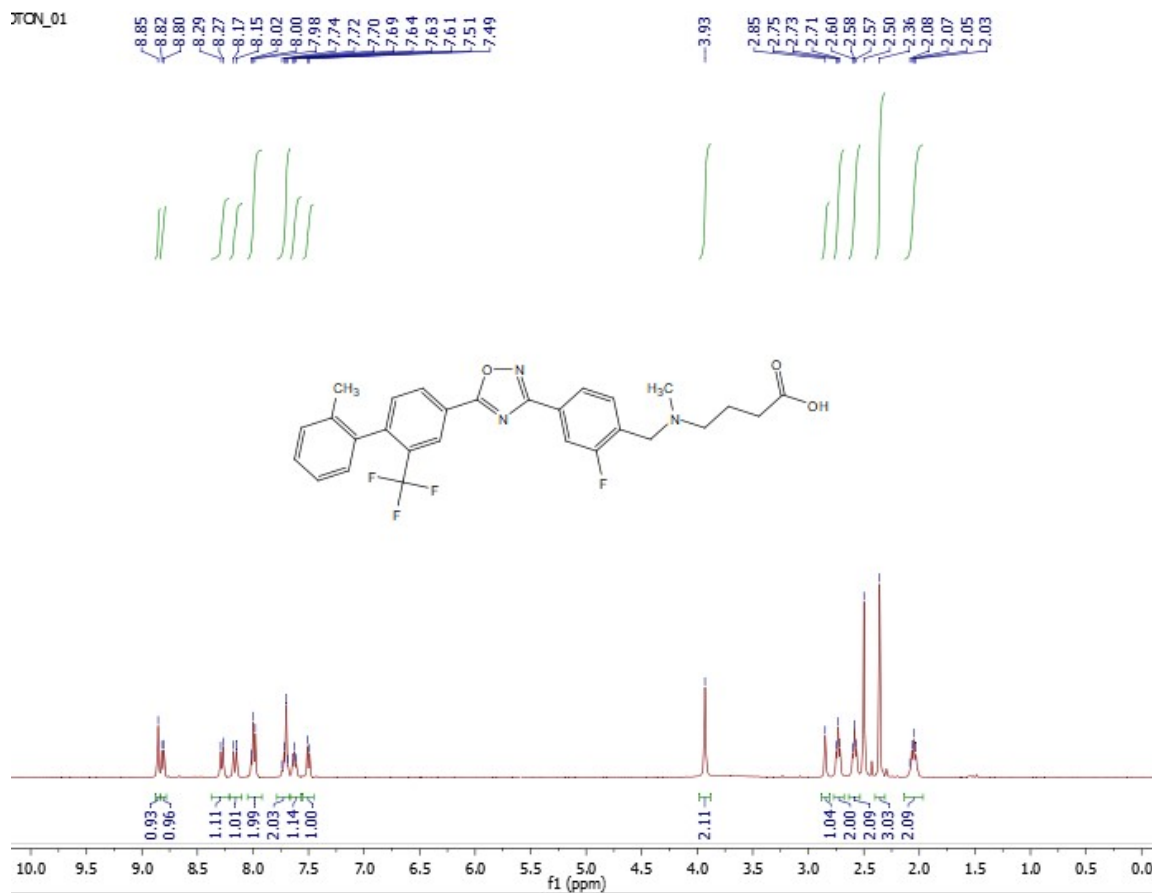

Electronic Supplementary Information

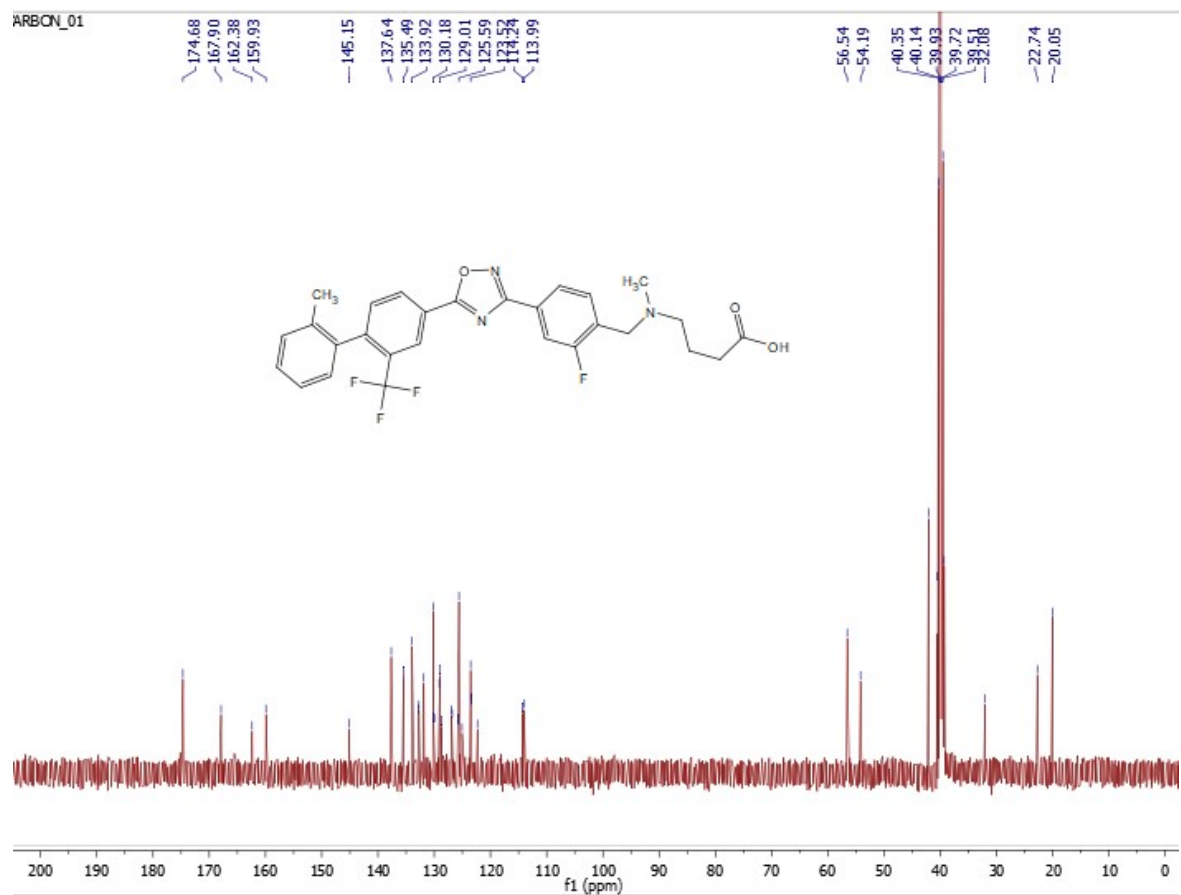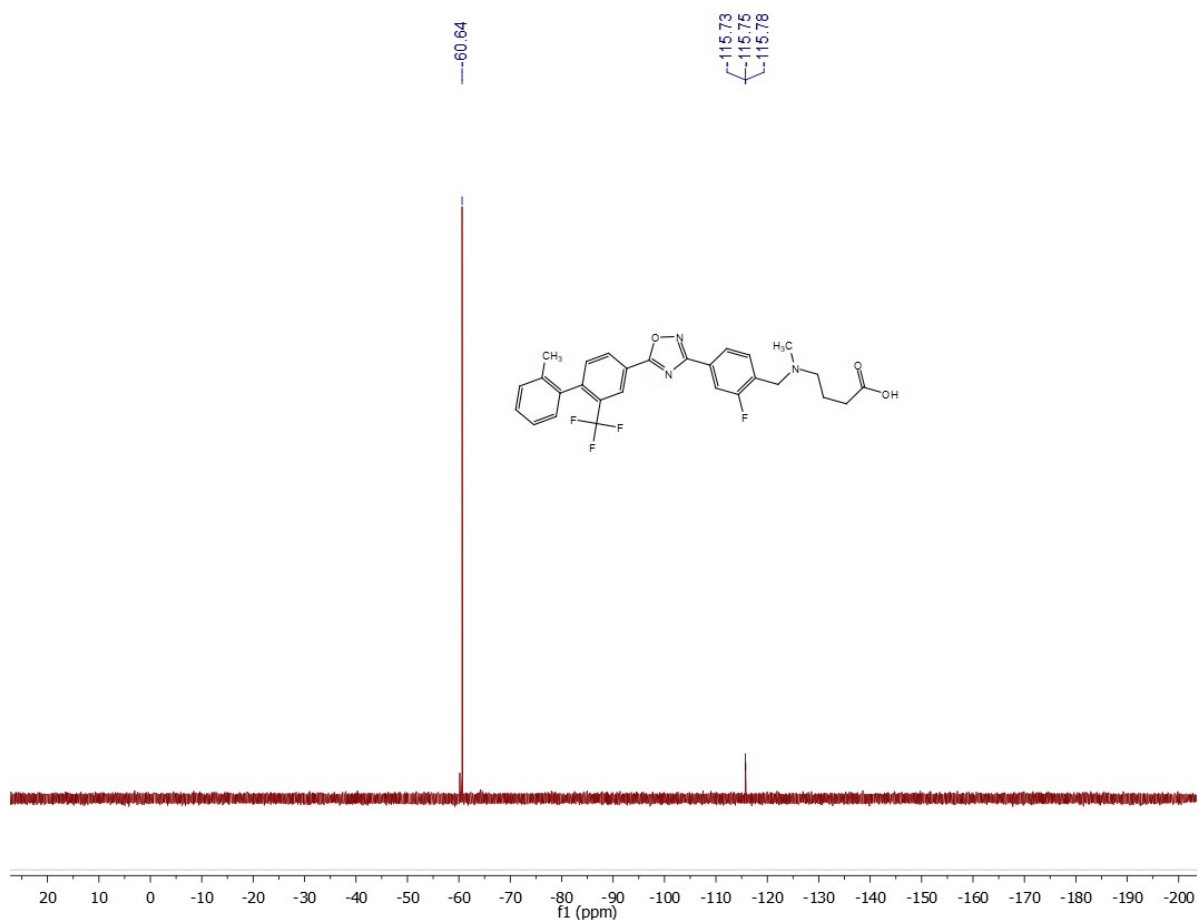

$^1\text{H}$  NMR,  $^{13}\text{C}$  NMR, and  $^{19}\text{F}$  NMR of **7d**

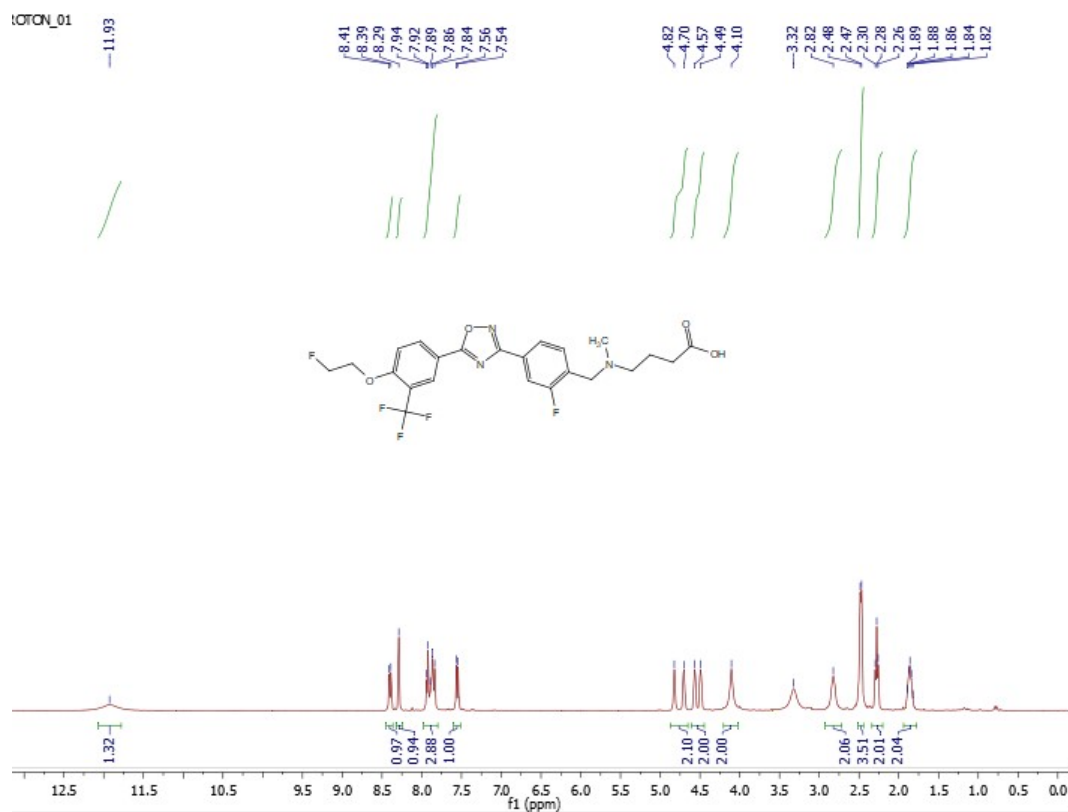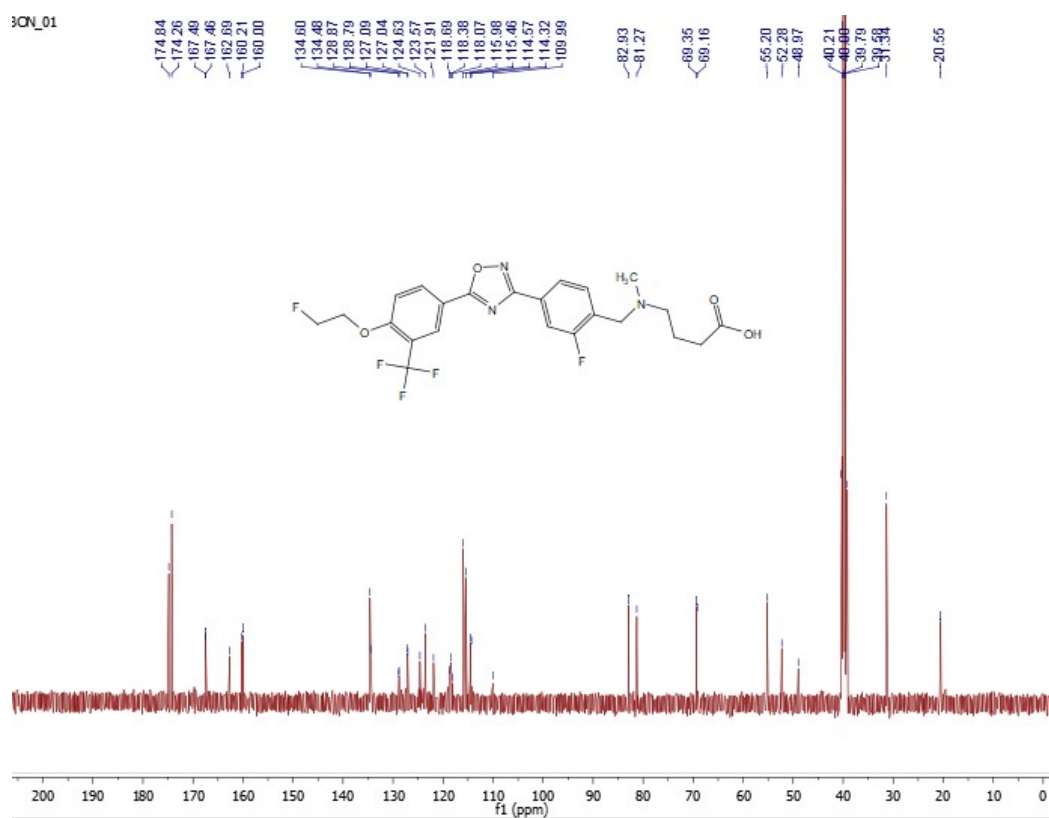

<sup>1</sup>H NMR and <sup>13</sup>C NMR of 7e

Electronic Supplementary Information

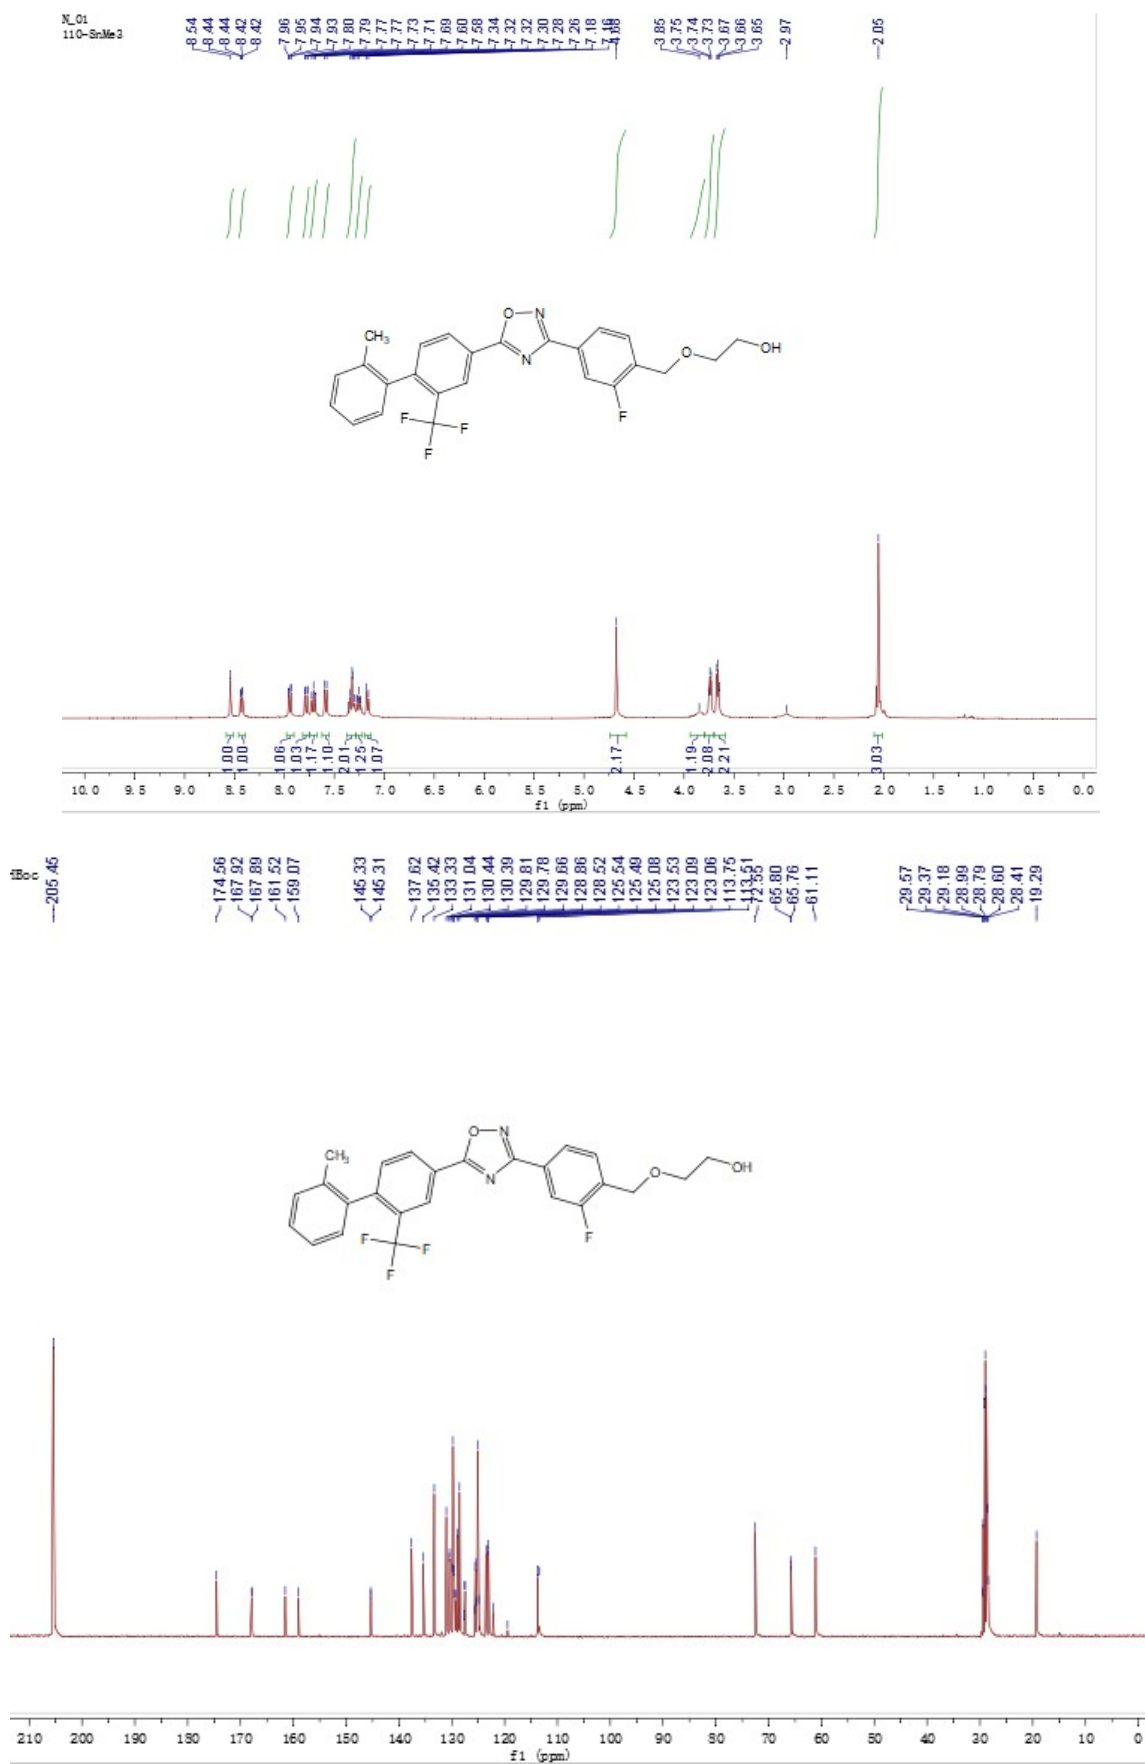

Electronic Supplementary Information

7NE\_01

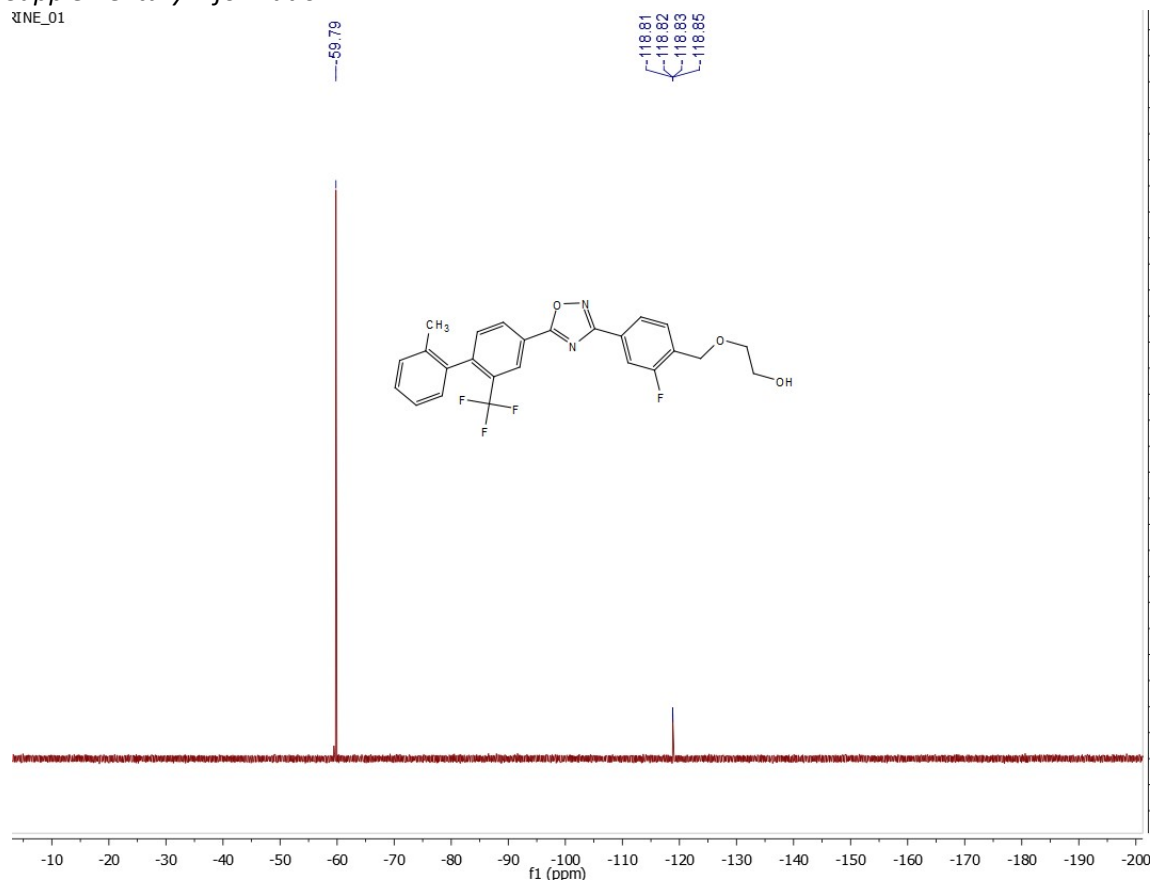

$^1\text{H}$  NMR,  $^{13}\text{C}$  NMR, and  $^{19}\text{F}$  NMR of **9a**

Electronic Supplementary Information

N\_01

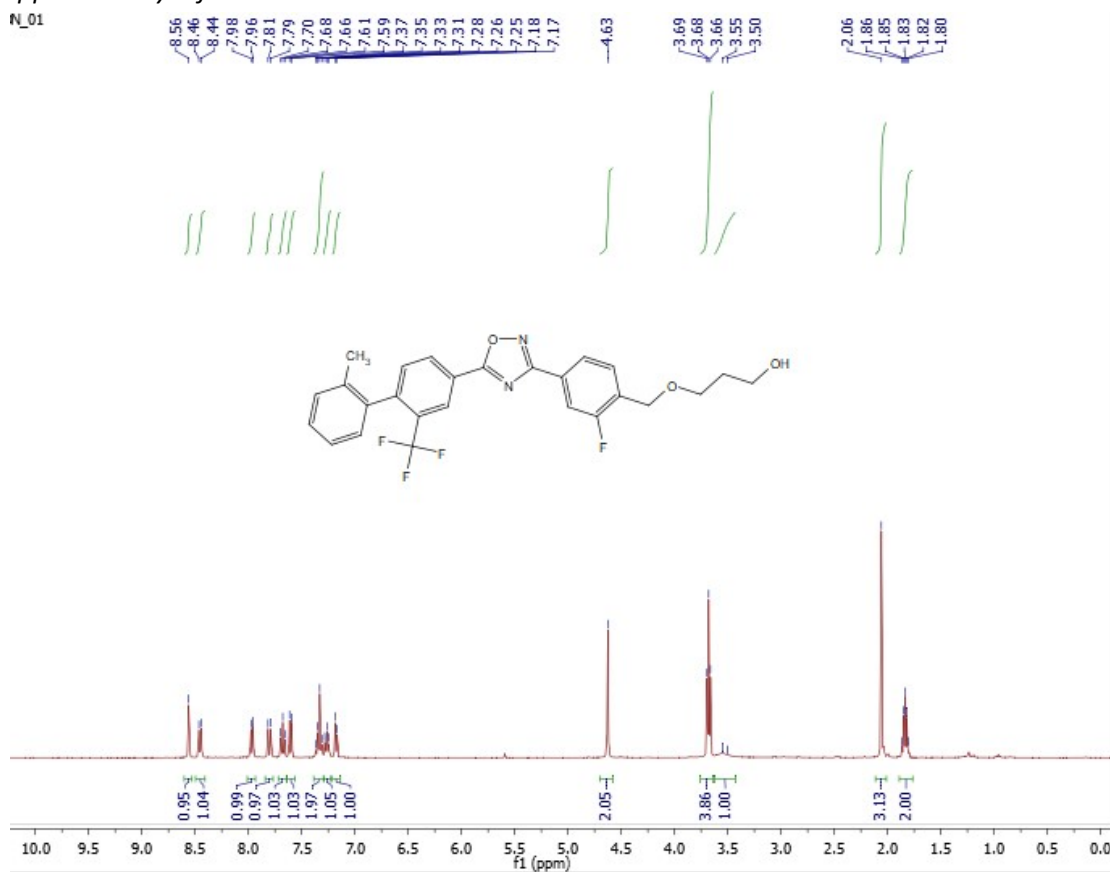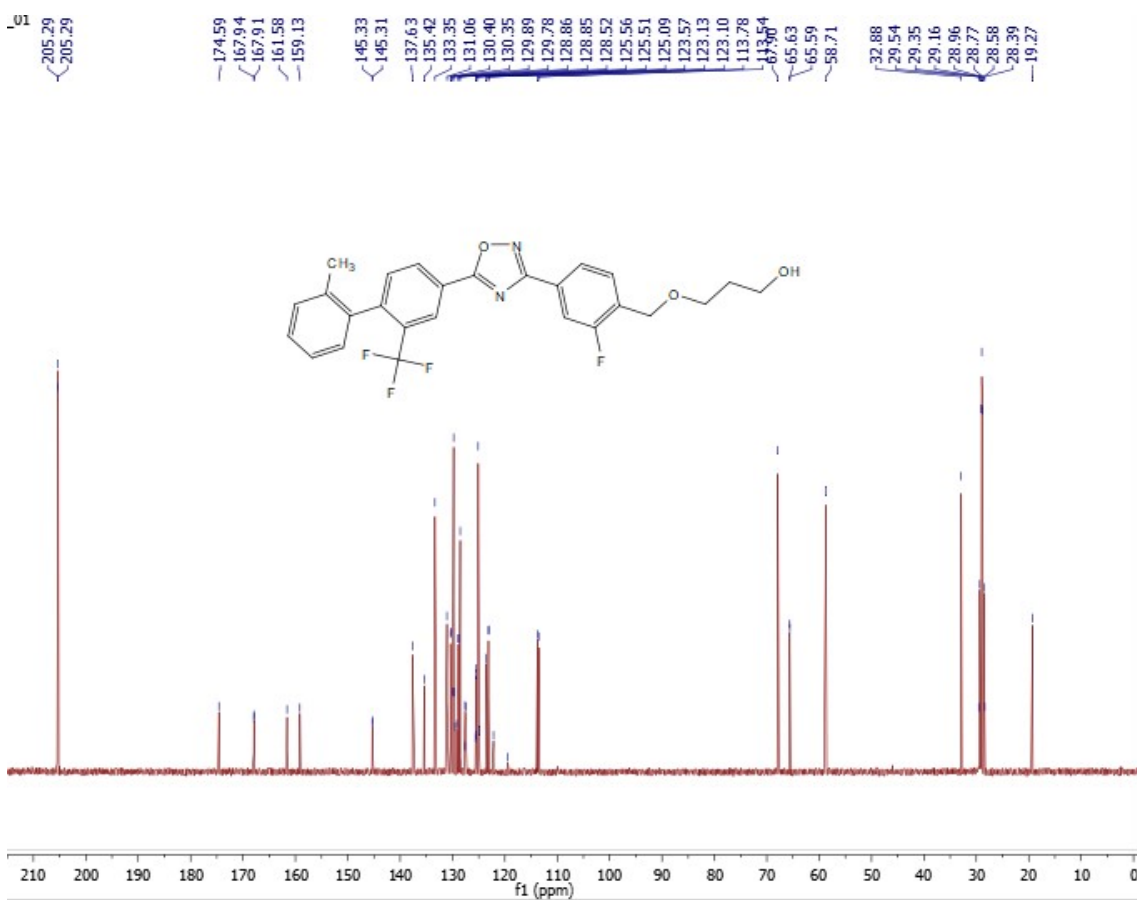

<sup>1</sup>H NMR and <sup>13</sup>C NMR of **9b**



Electronic Supplementary Information

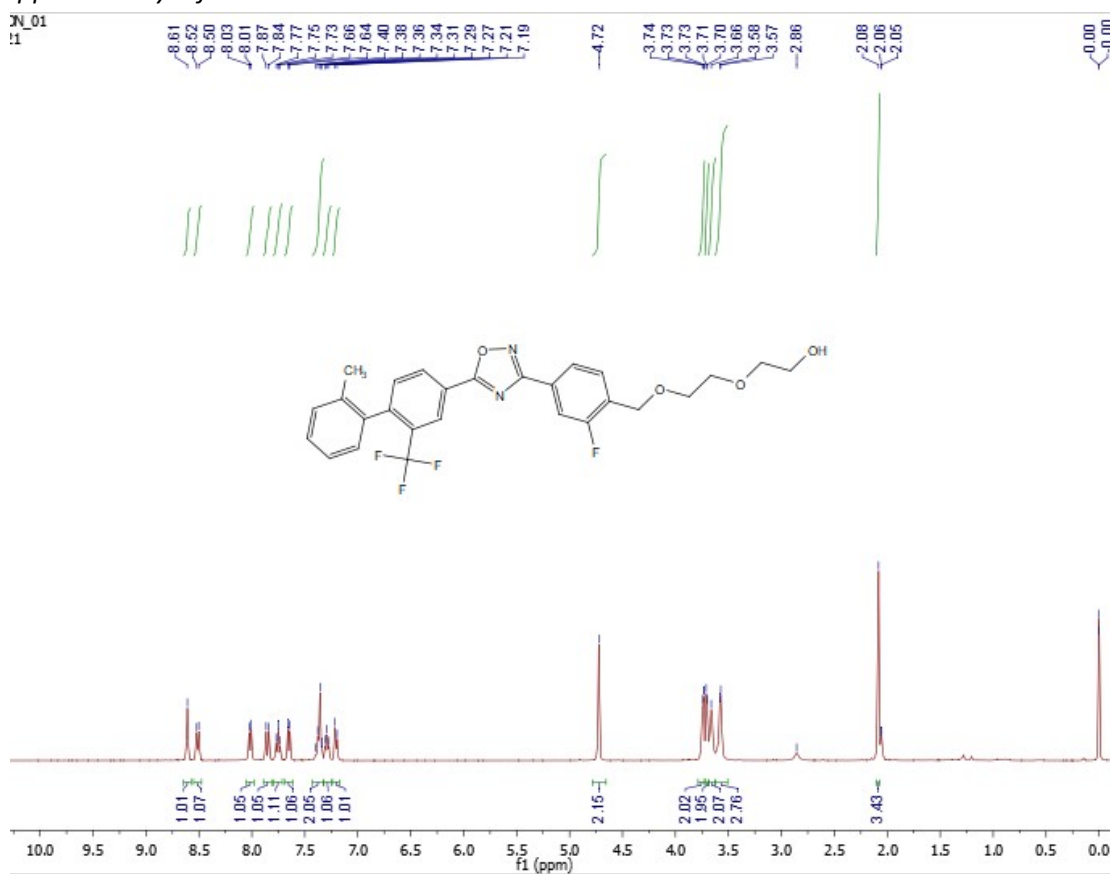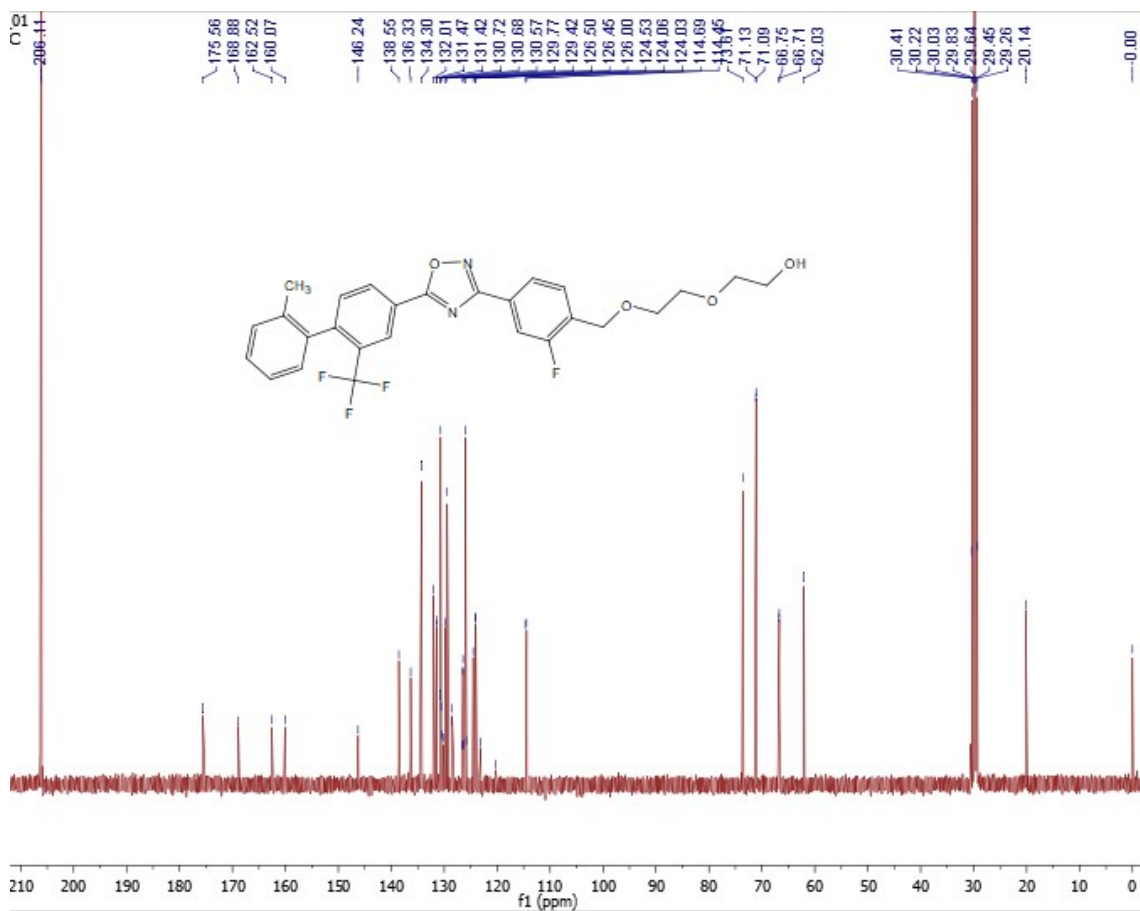

Electronic Supplementary Information

UORINE\_01

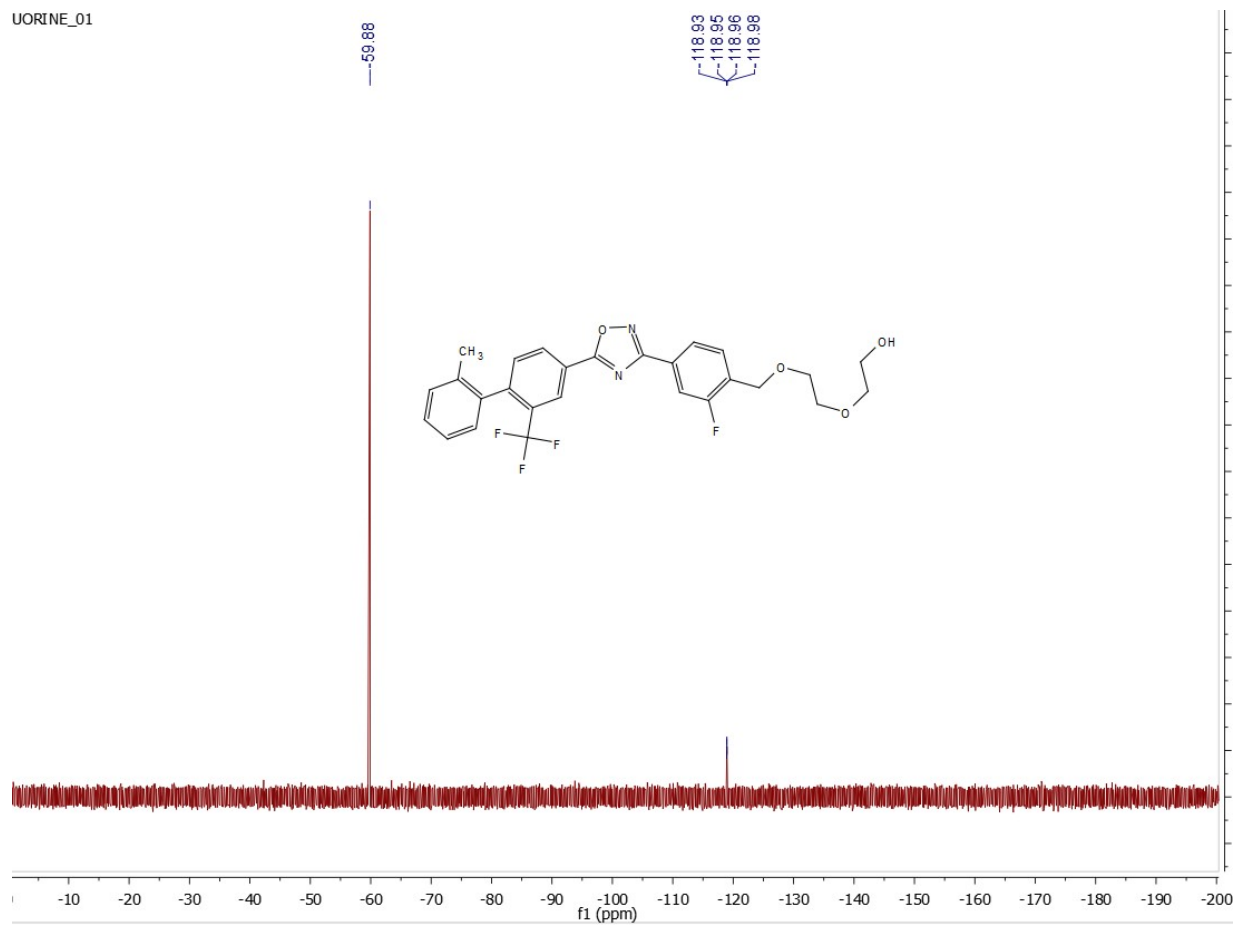

$^1\text{H}$  NMR,  $^{13}\text{C}$  NMR, and  $^{19}\text{F}$  NMR of **9c**

Electronic Supplementary Information

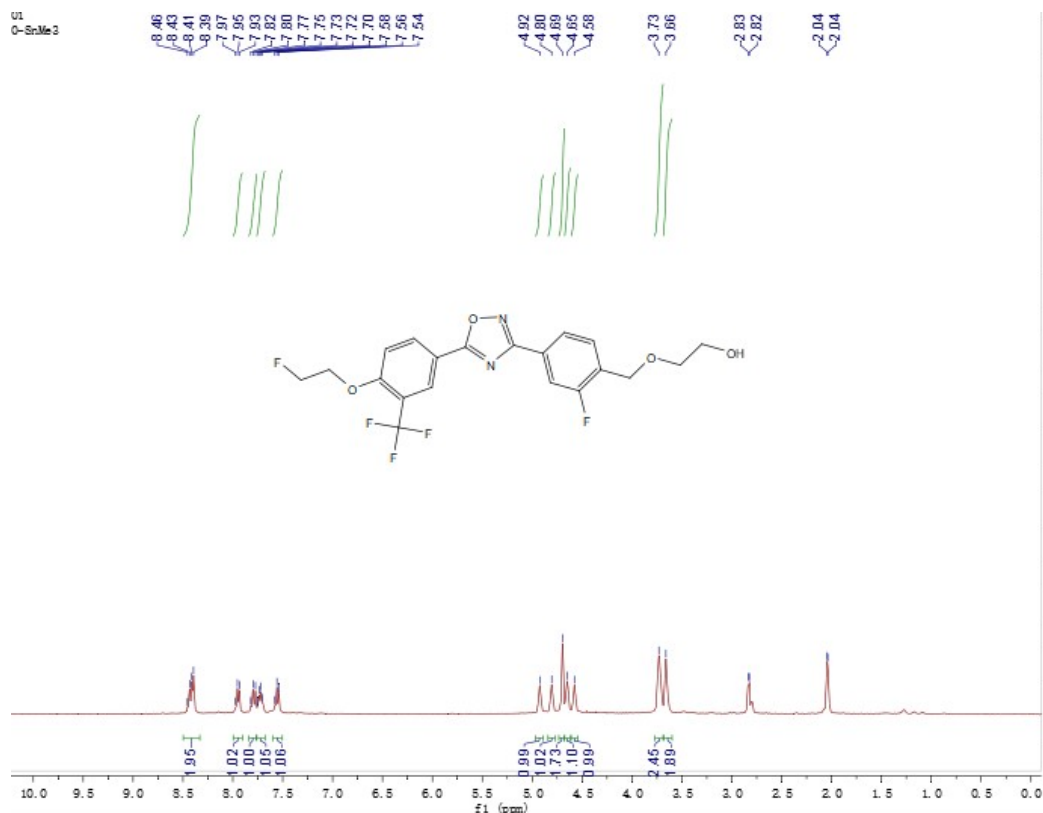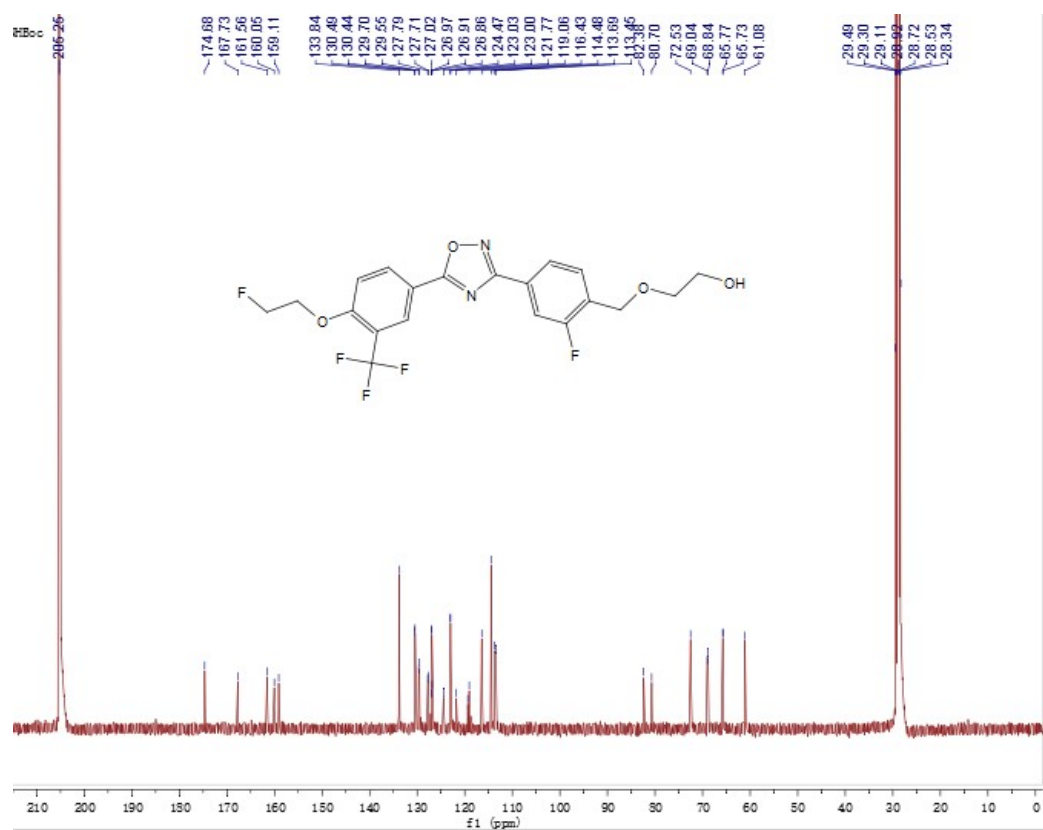

<sup>1</sup>H NMR and <sup>13</sup>C NMR of **9d**

Electronic Supplementary Information

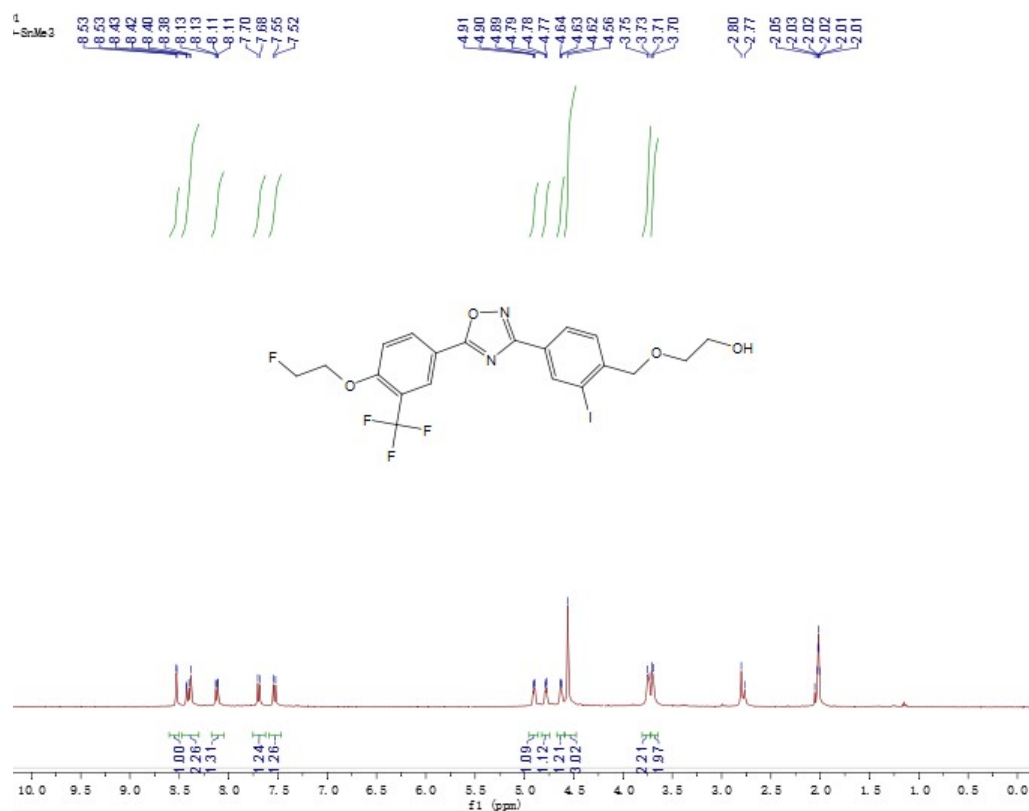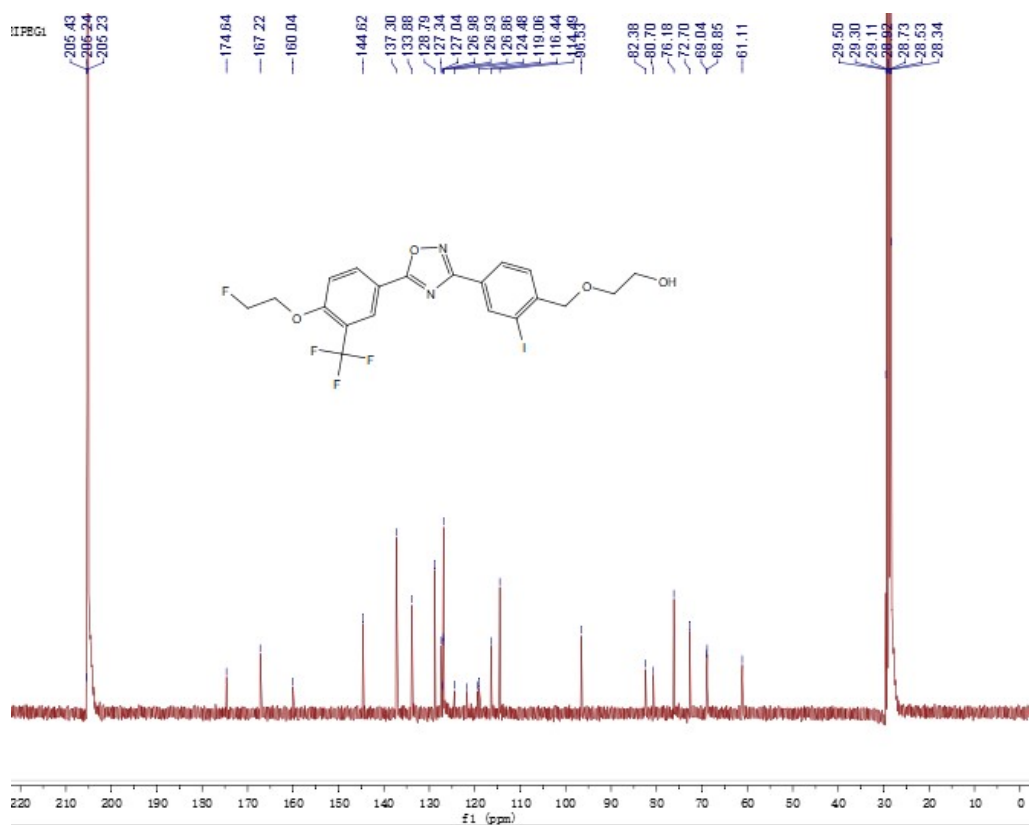

<sup>1</sup>H NMR and <sup>13</sup>C NMR of 9e

Electronic Supplementary Information

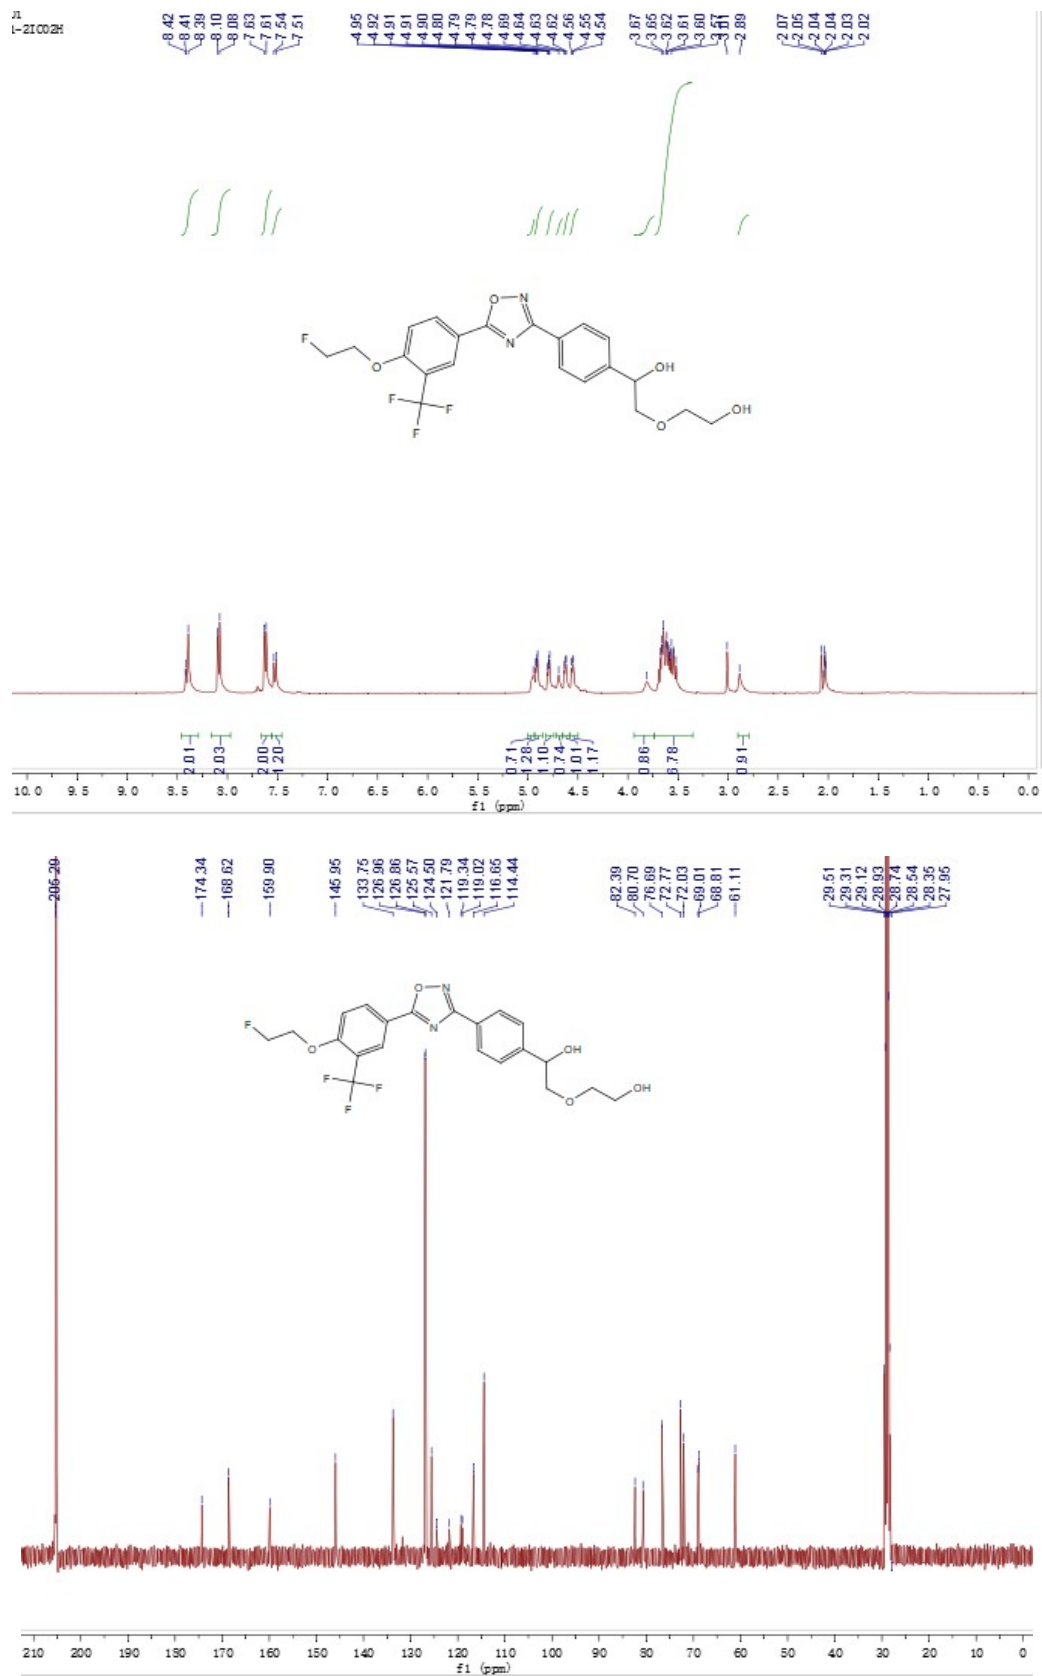

<sup>1</sup>H NMR and <sup>13</sup>C NMR of **9f**

Electronic Supplementary Information

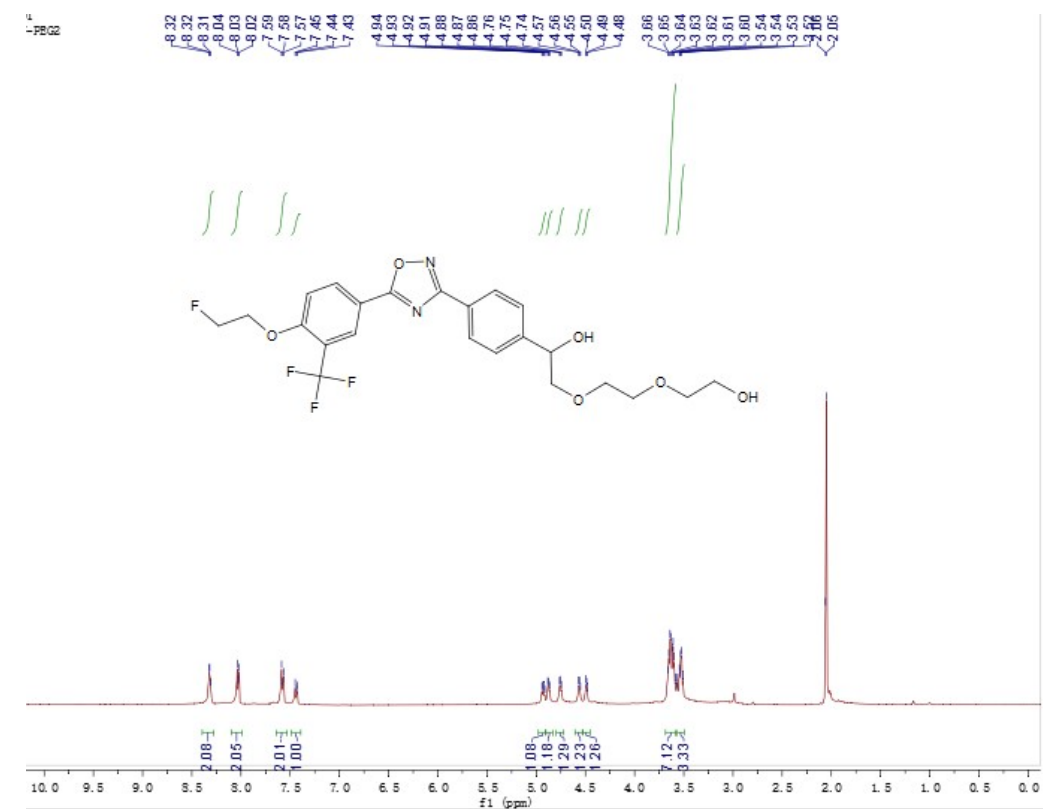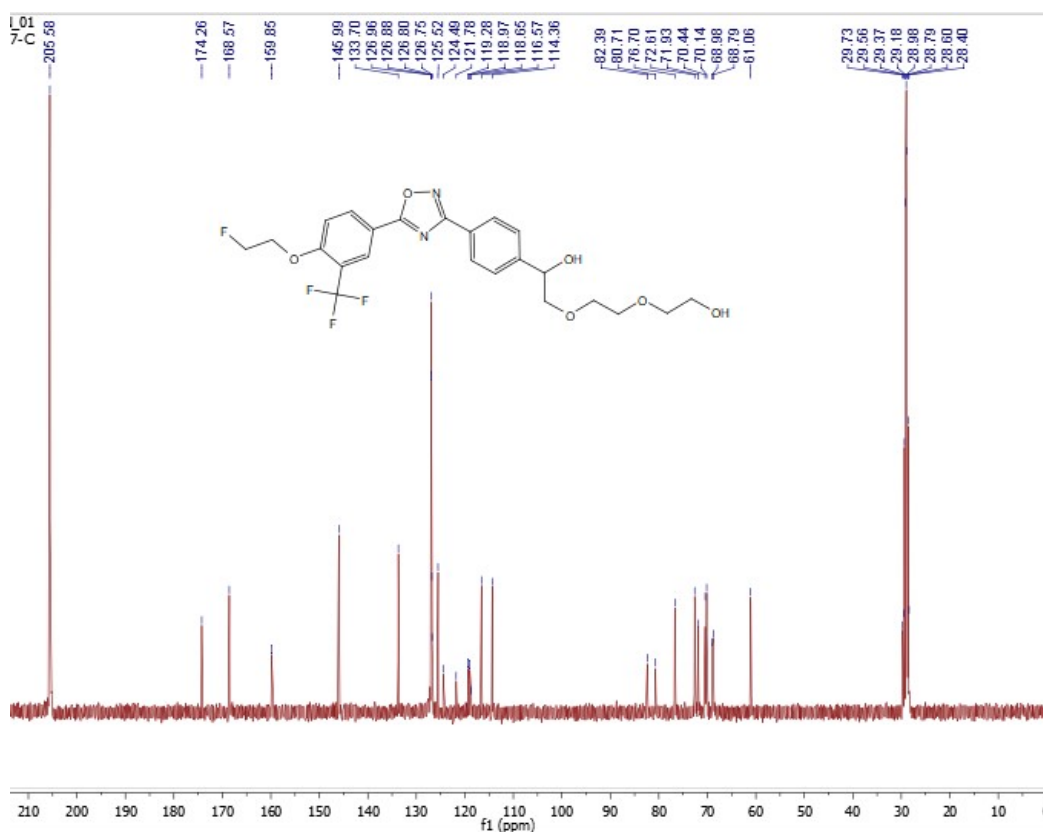

<sup>1</sup>H NMR and <sup>13</sup>C NMR of 9g

Electronic Supplementary Information

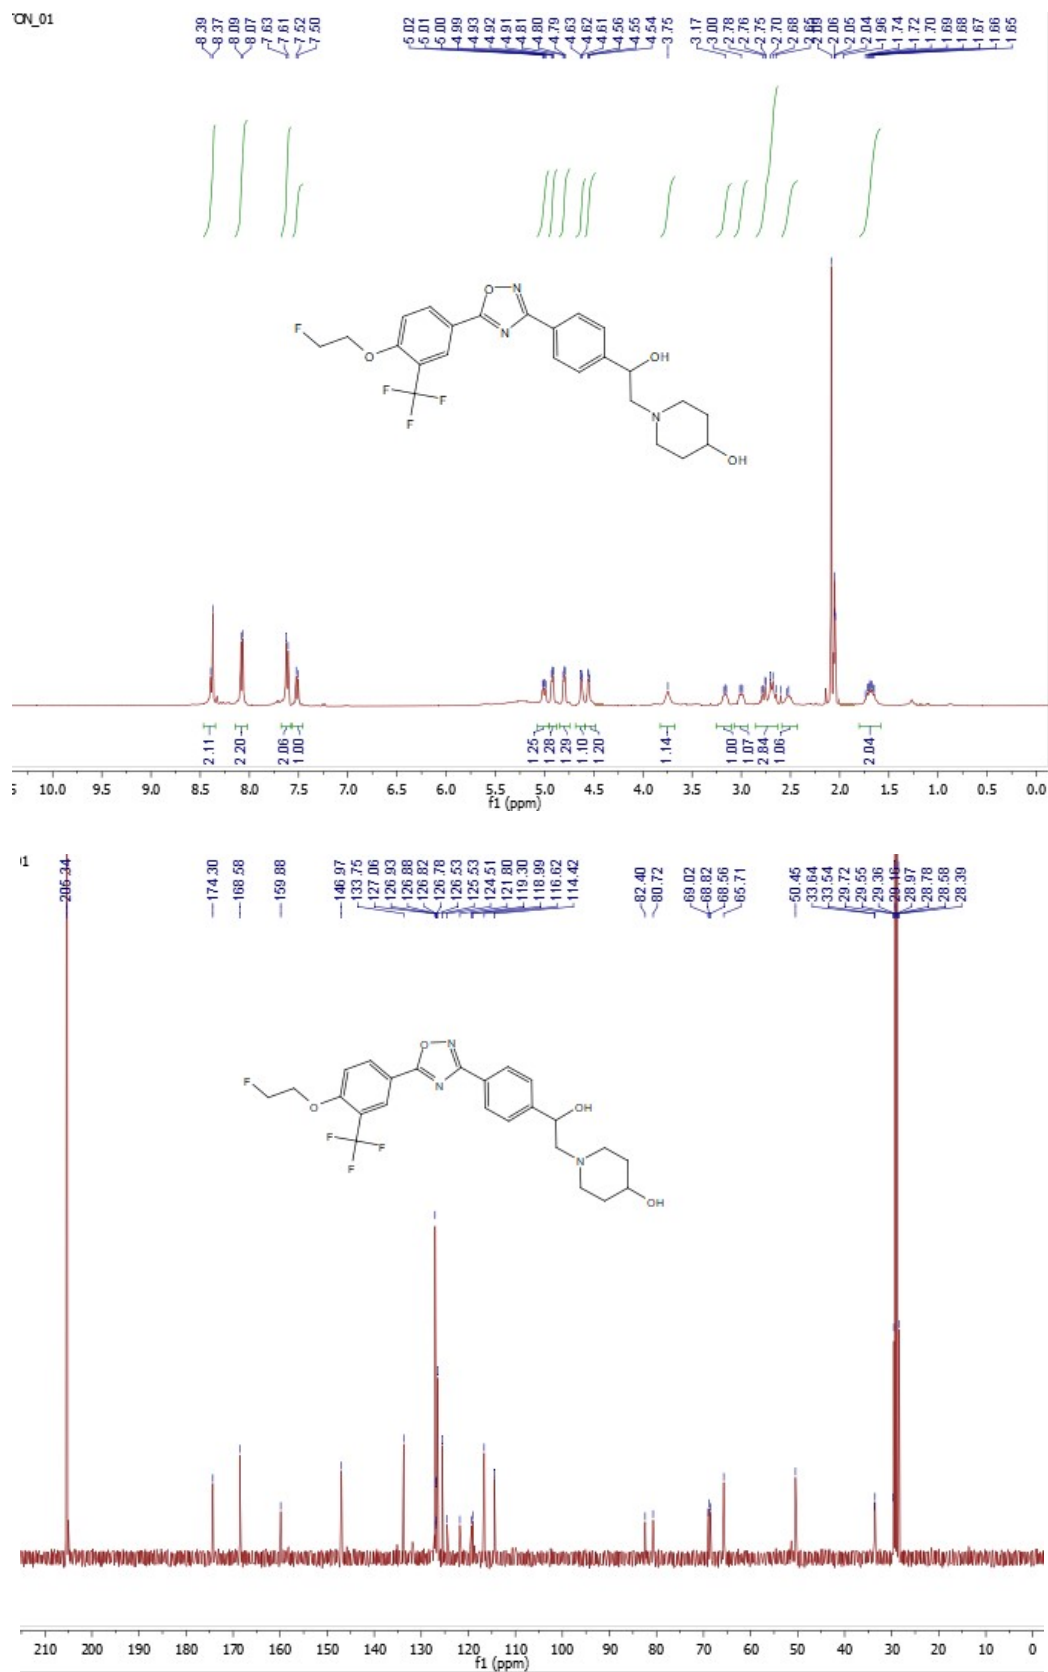

<sup>1</sup>H NMR and <sup>13</sup>C NMR of 9h

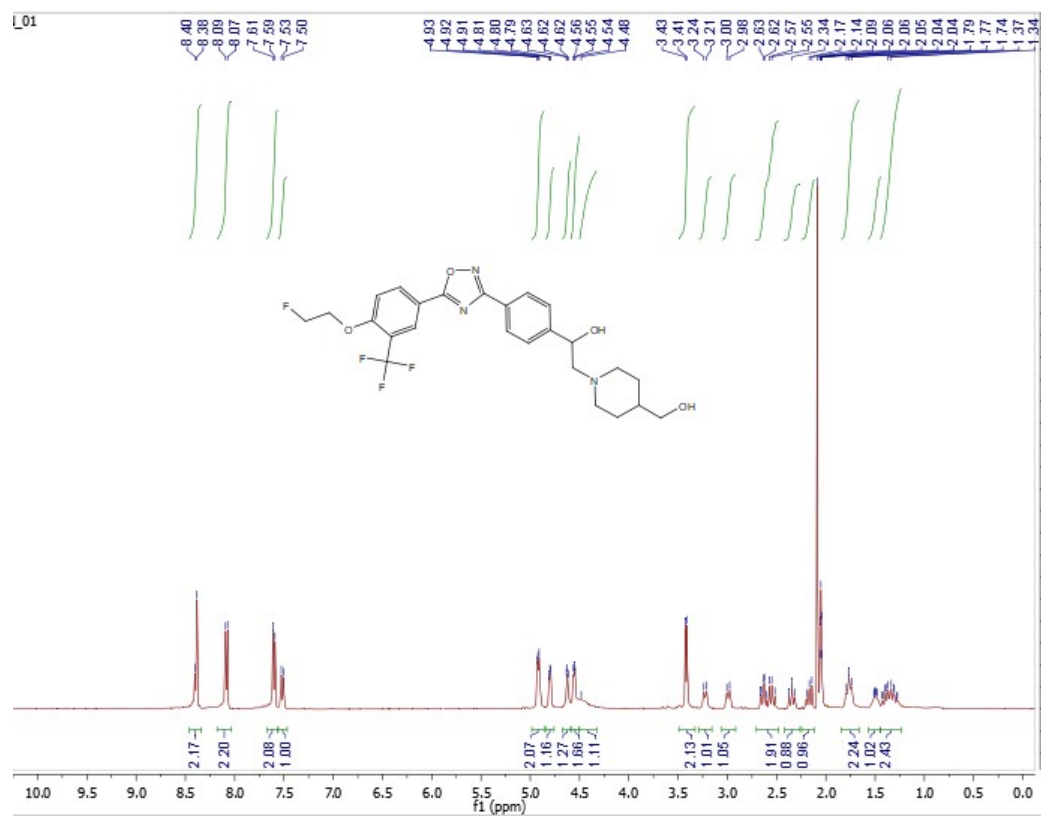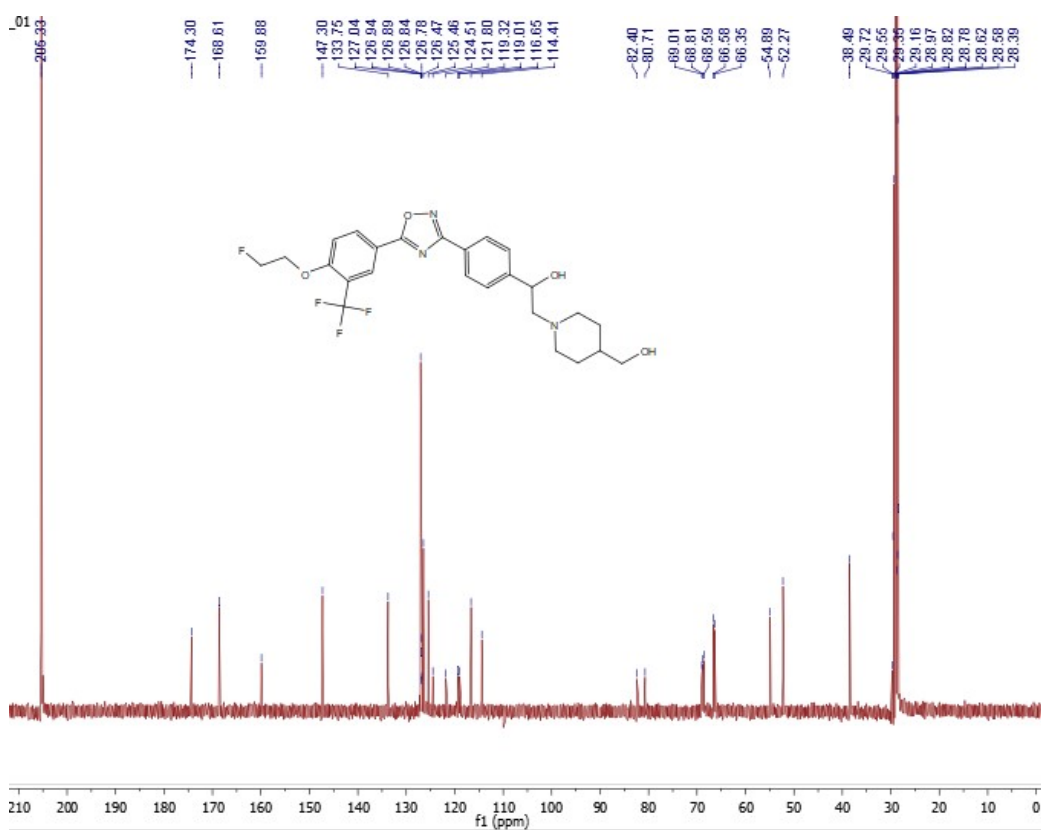

<sup>1</sup>H NMR and <sup>13</sup>C NMR of **9i**



Electronic Supplementary Information

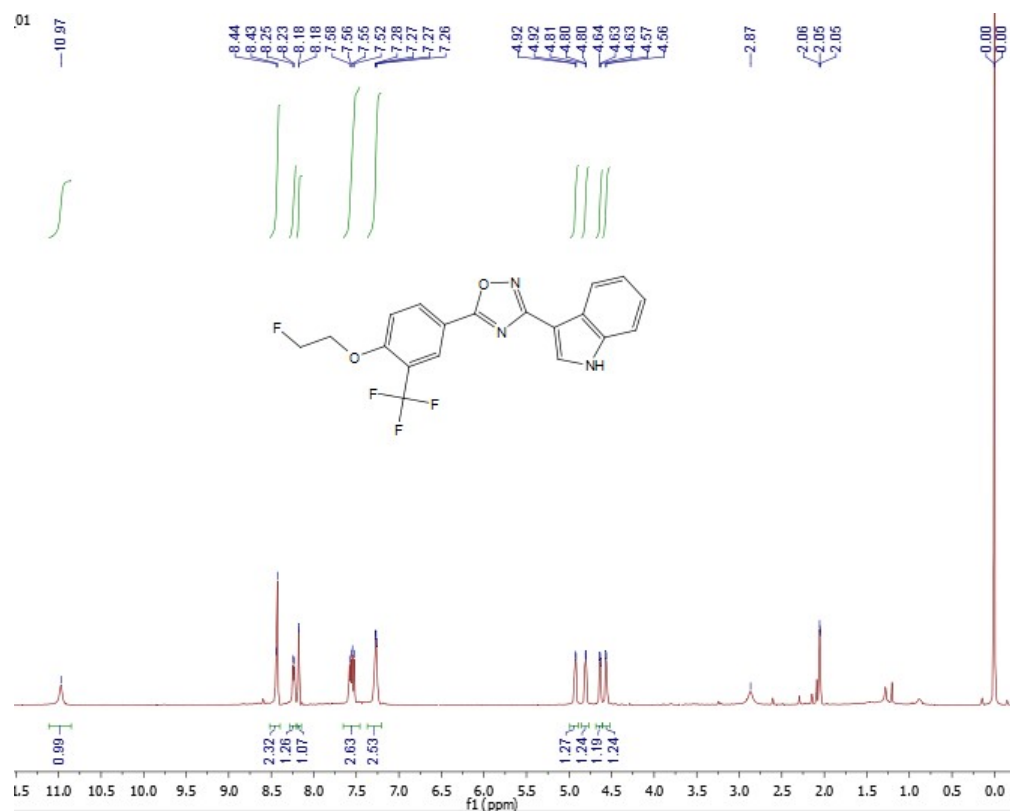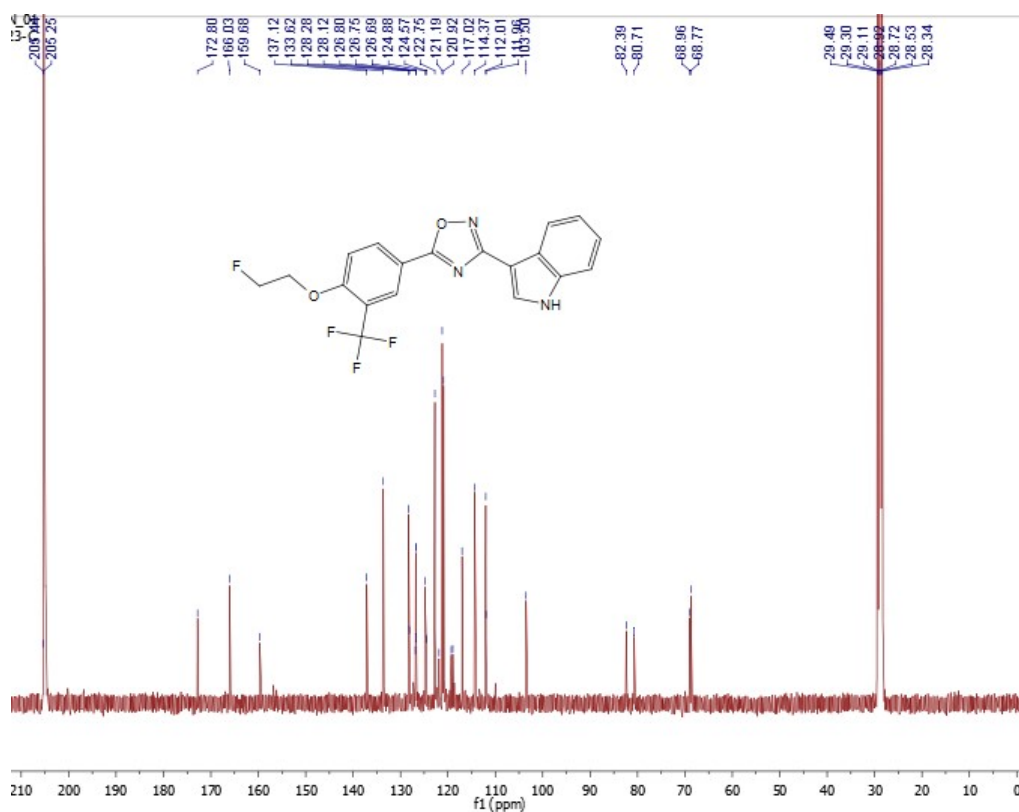

<sup>1</sup>H NMR and <sup>13</sup>C NMR of 12a

Electronic Supplementary Information

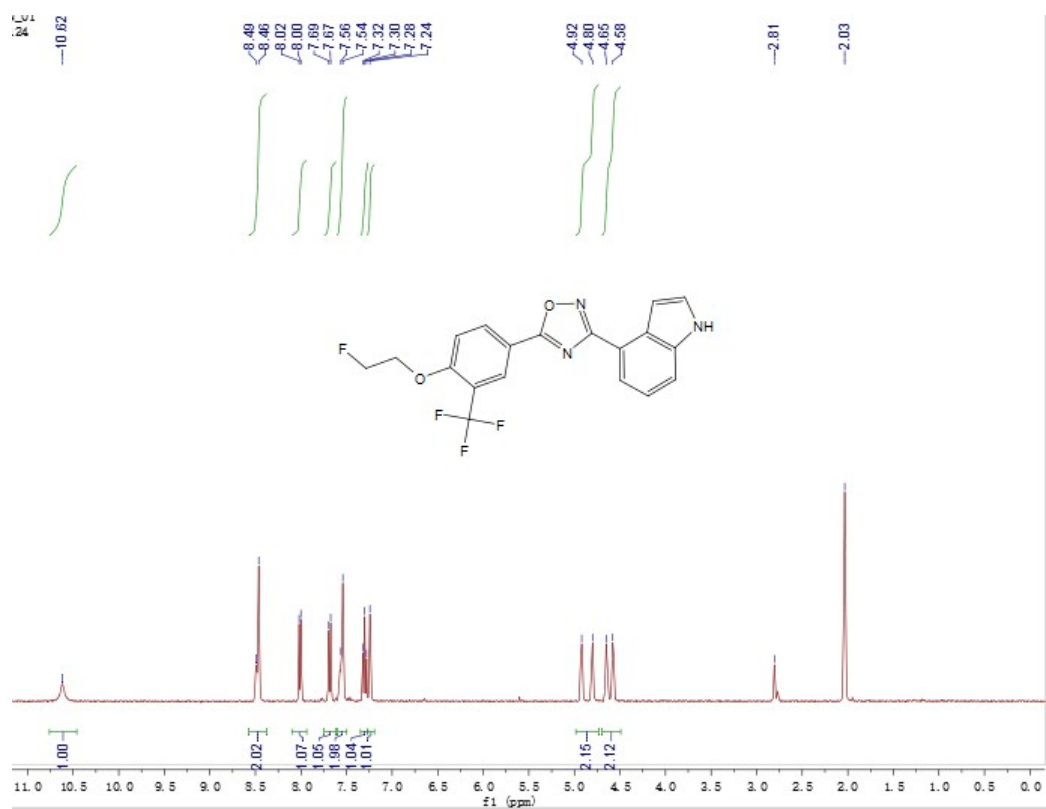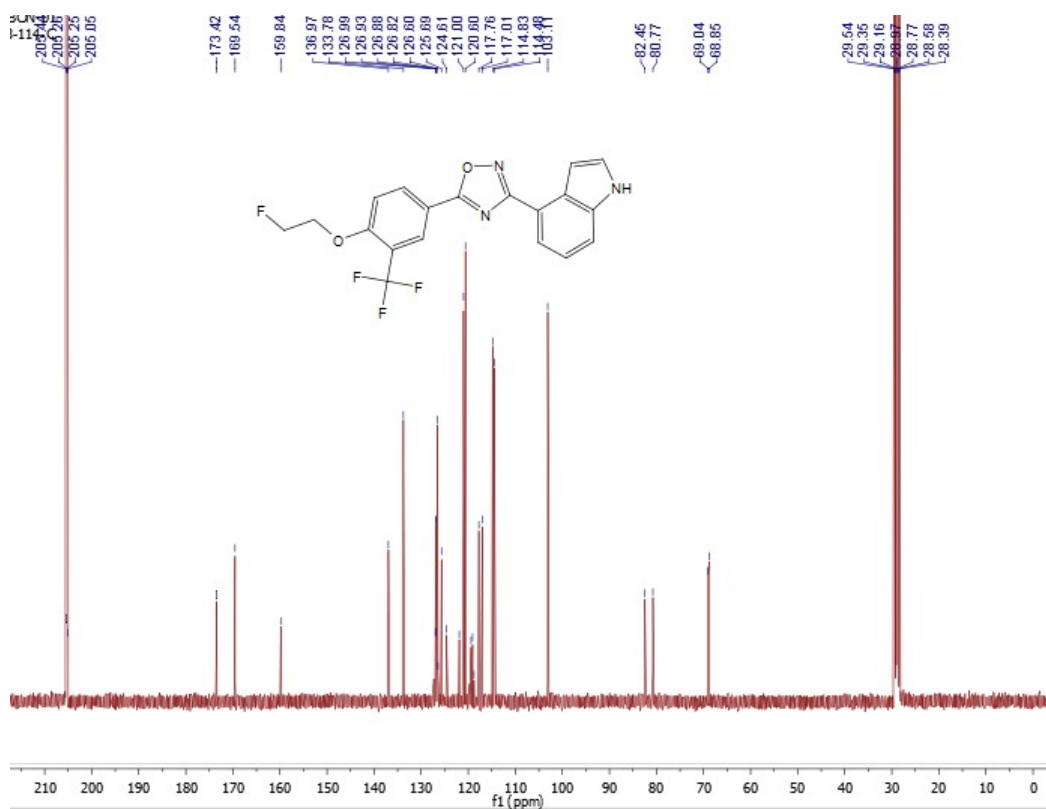

RINE\_01

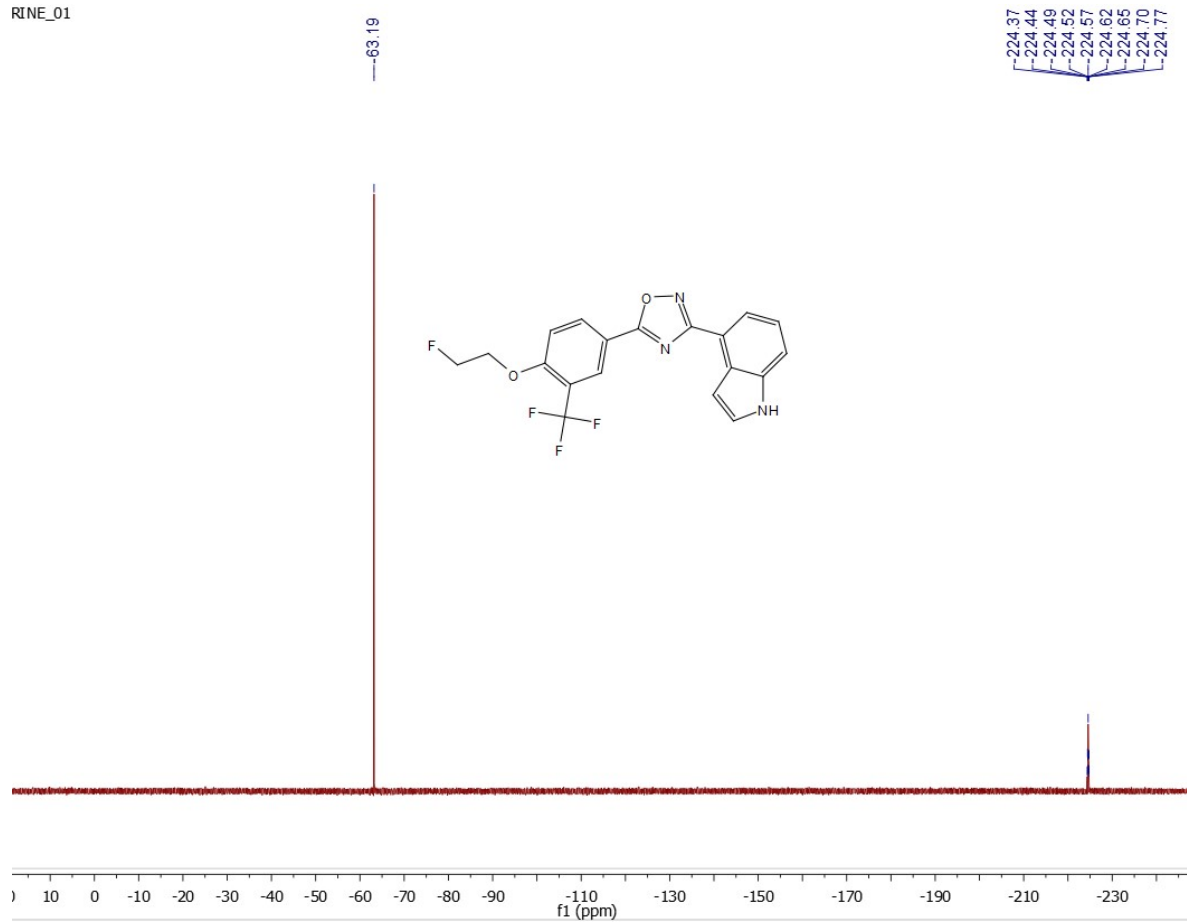

<sup>1</sup>H NMR, <sup>13</sup>C NMR, and <sup>19</sup>F NMR of **12b**

Electronic Supplementary Information

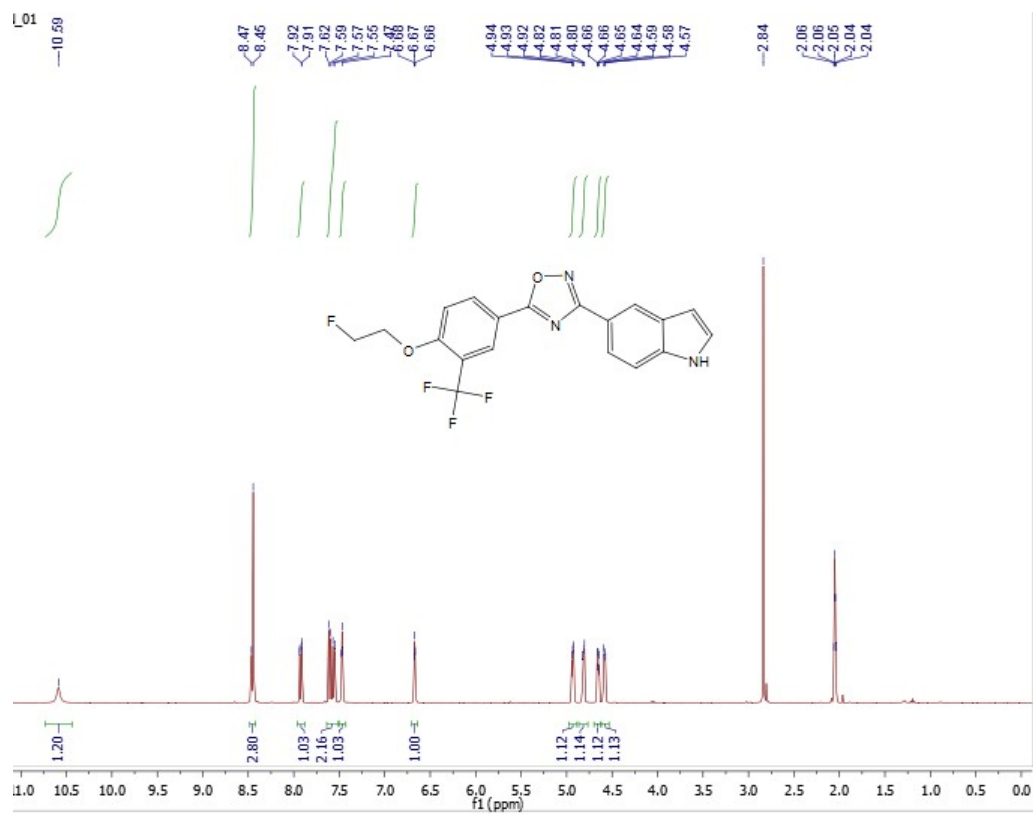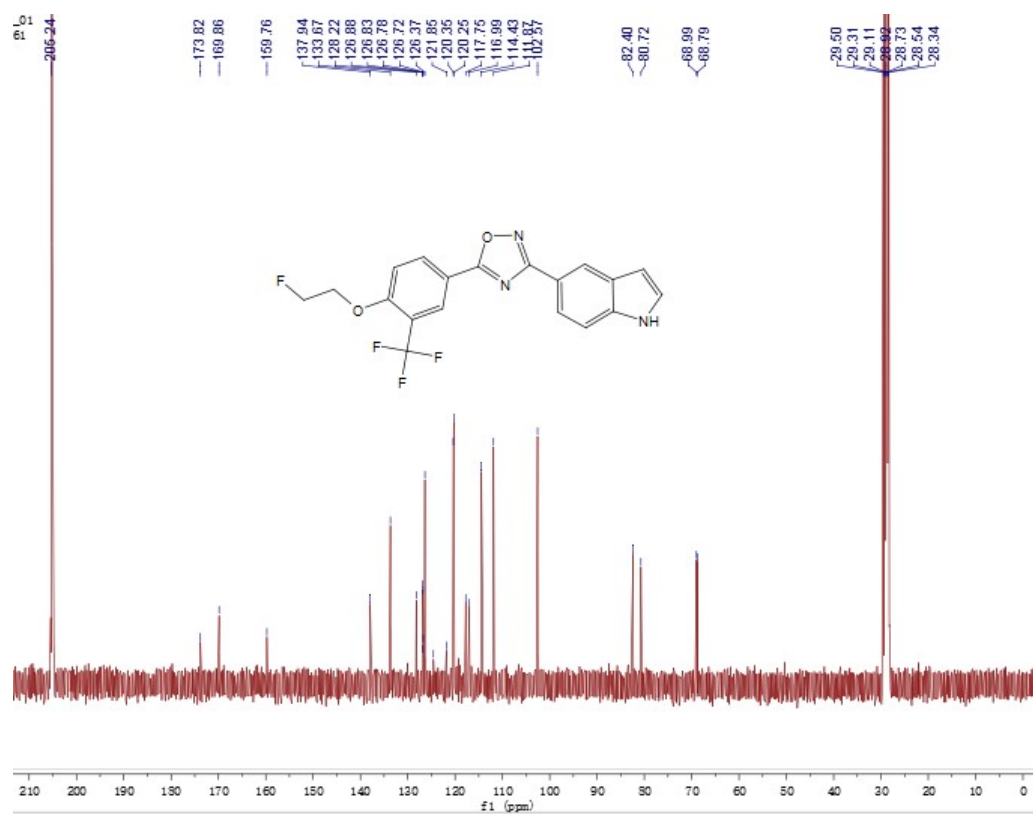

<sup>1</sup>H NMR and <sup>13</sup>C NMR of 12c

Electronic Supplementary Information

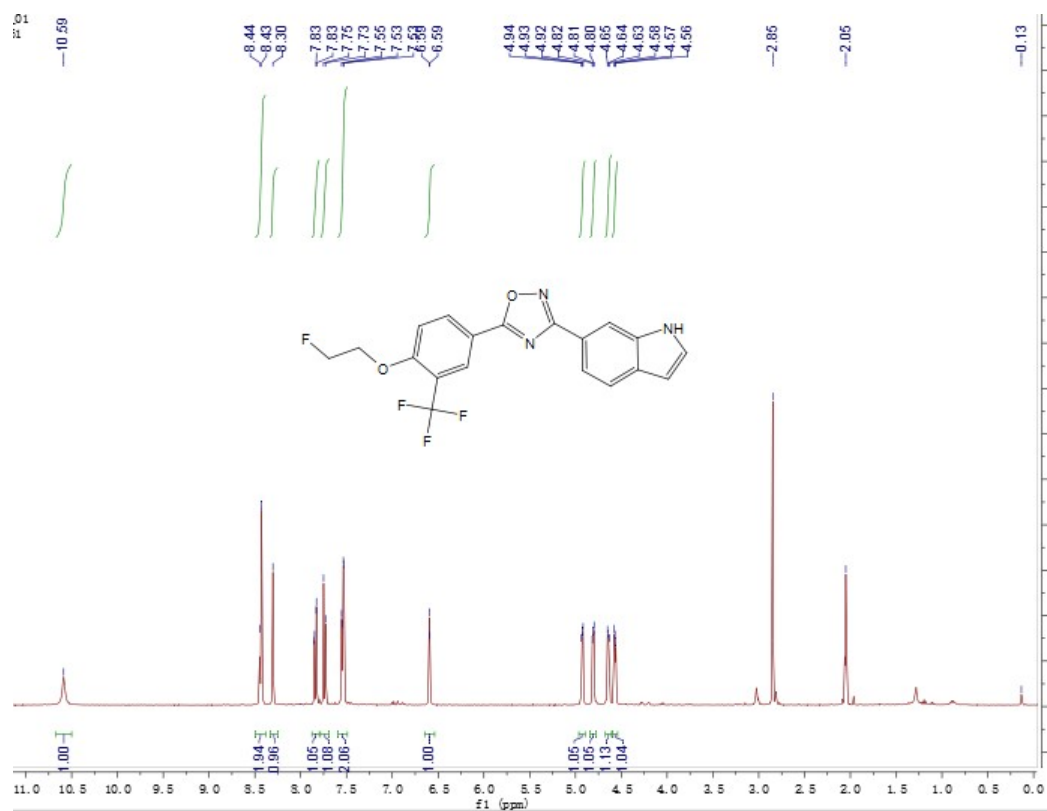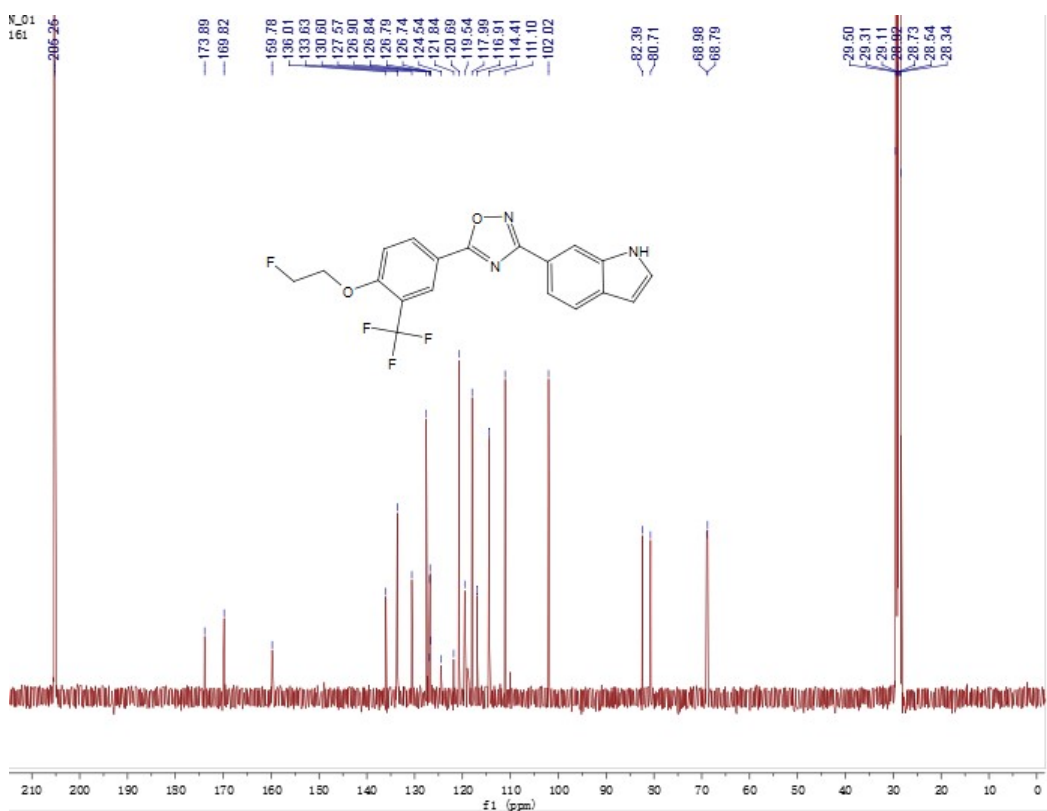

<sup>1</sup>H NMR and <sup>13</sup>C NMR of **12d**

Electronic Supplementary Information

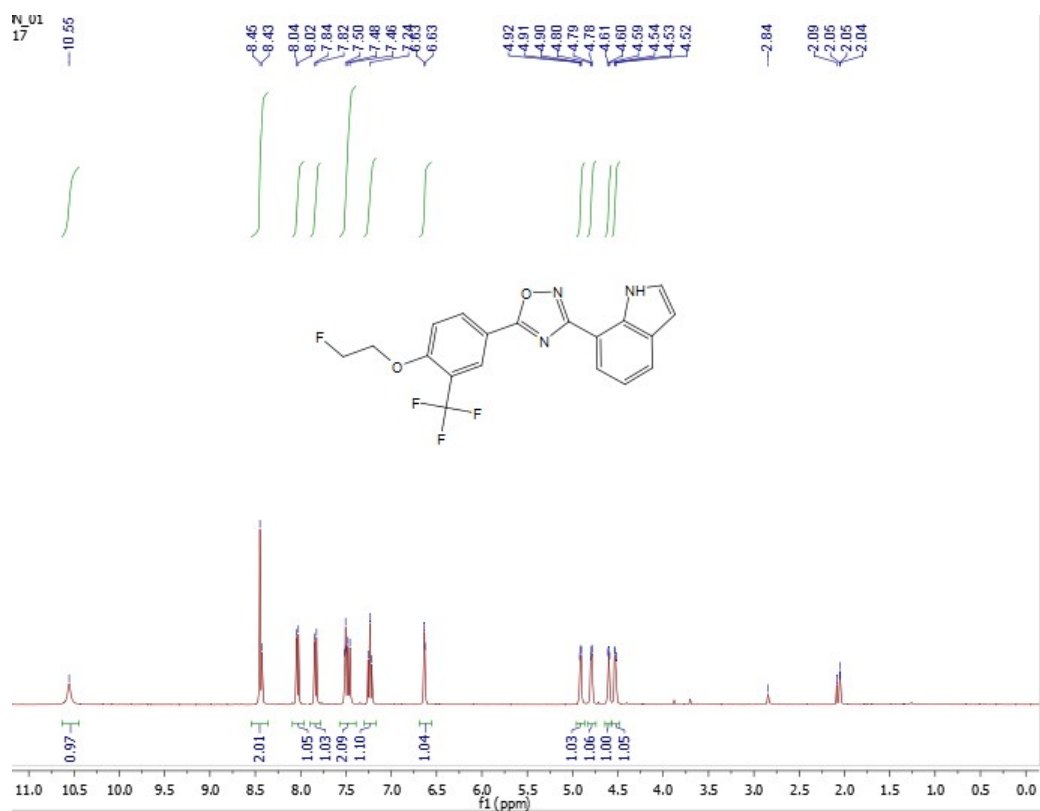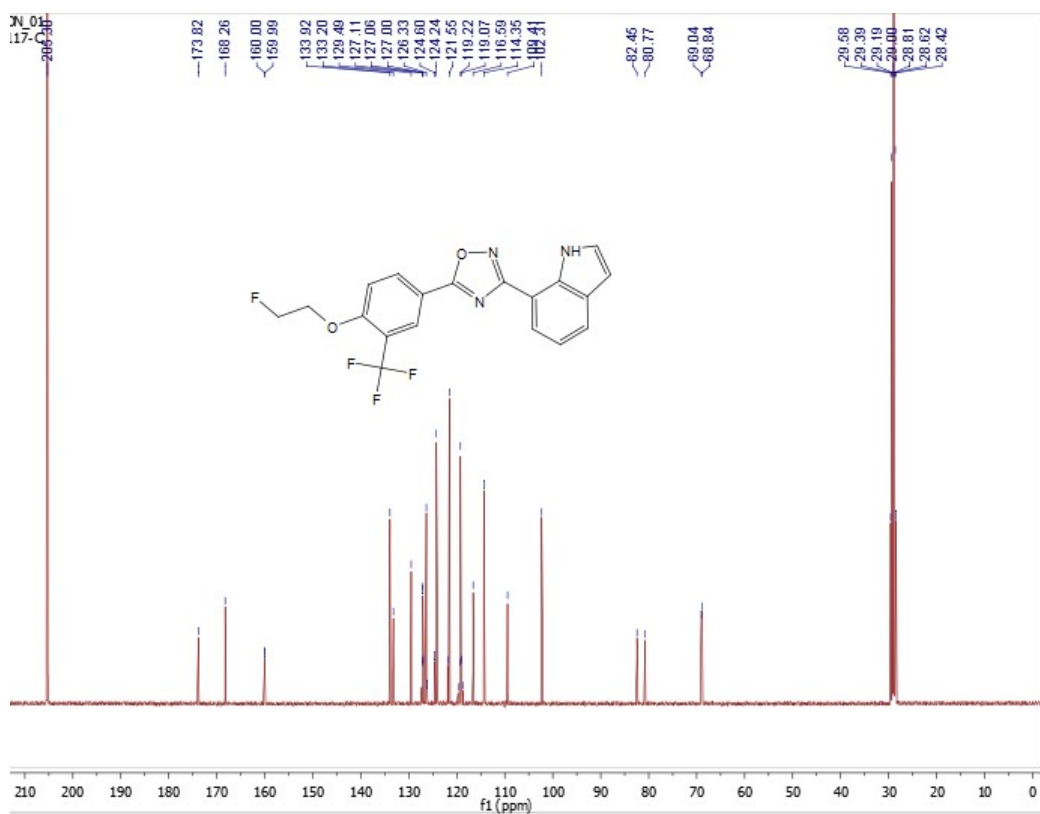

<sup>1</sup>H NMR and <sup>13</sup>C NMR of 12e

Electronic Supplementary Information

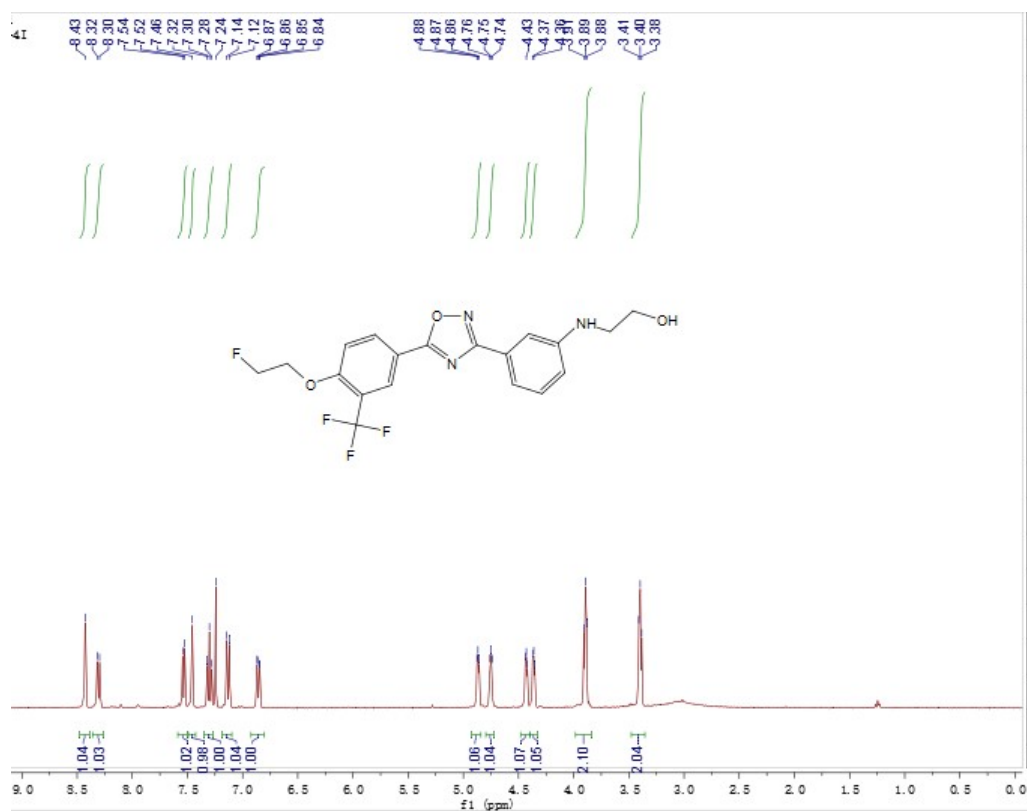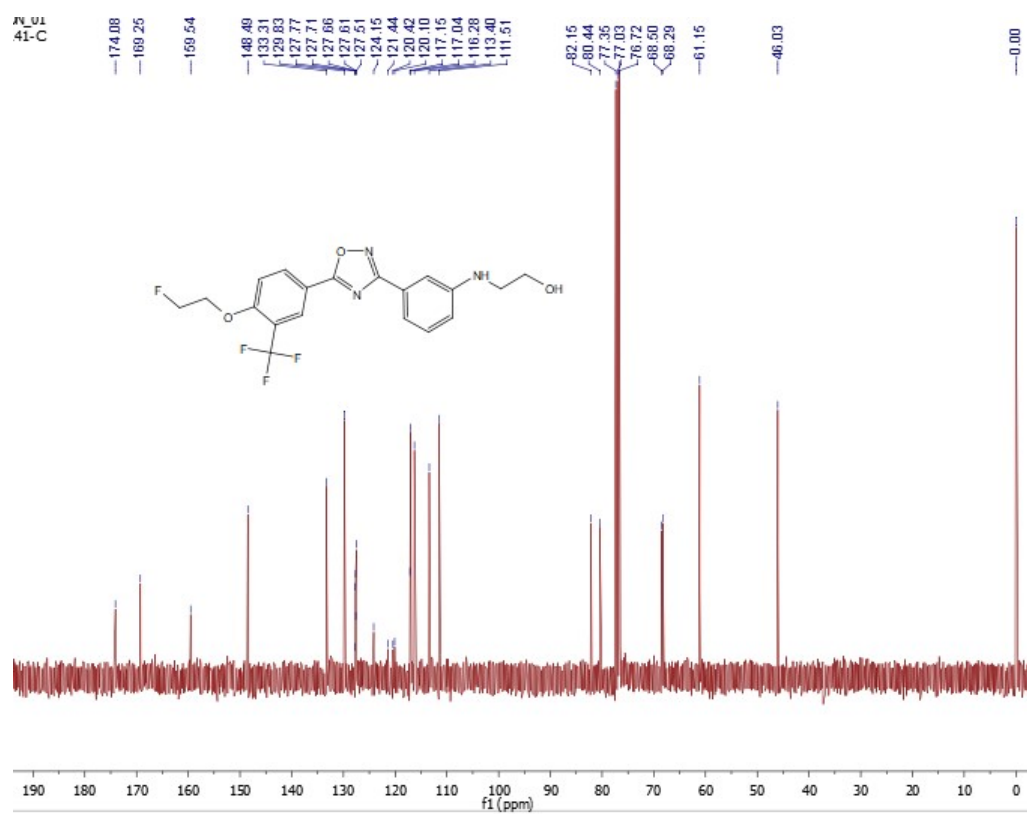

$^1\text{H}$  NMR and  $^{13}\text{C}$  NMR of **15a**

Electronic Supplementary Information

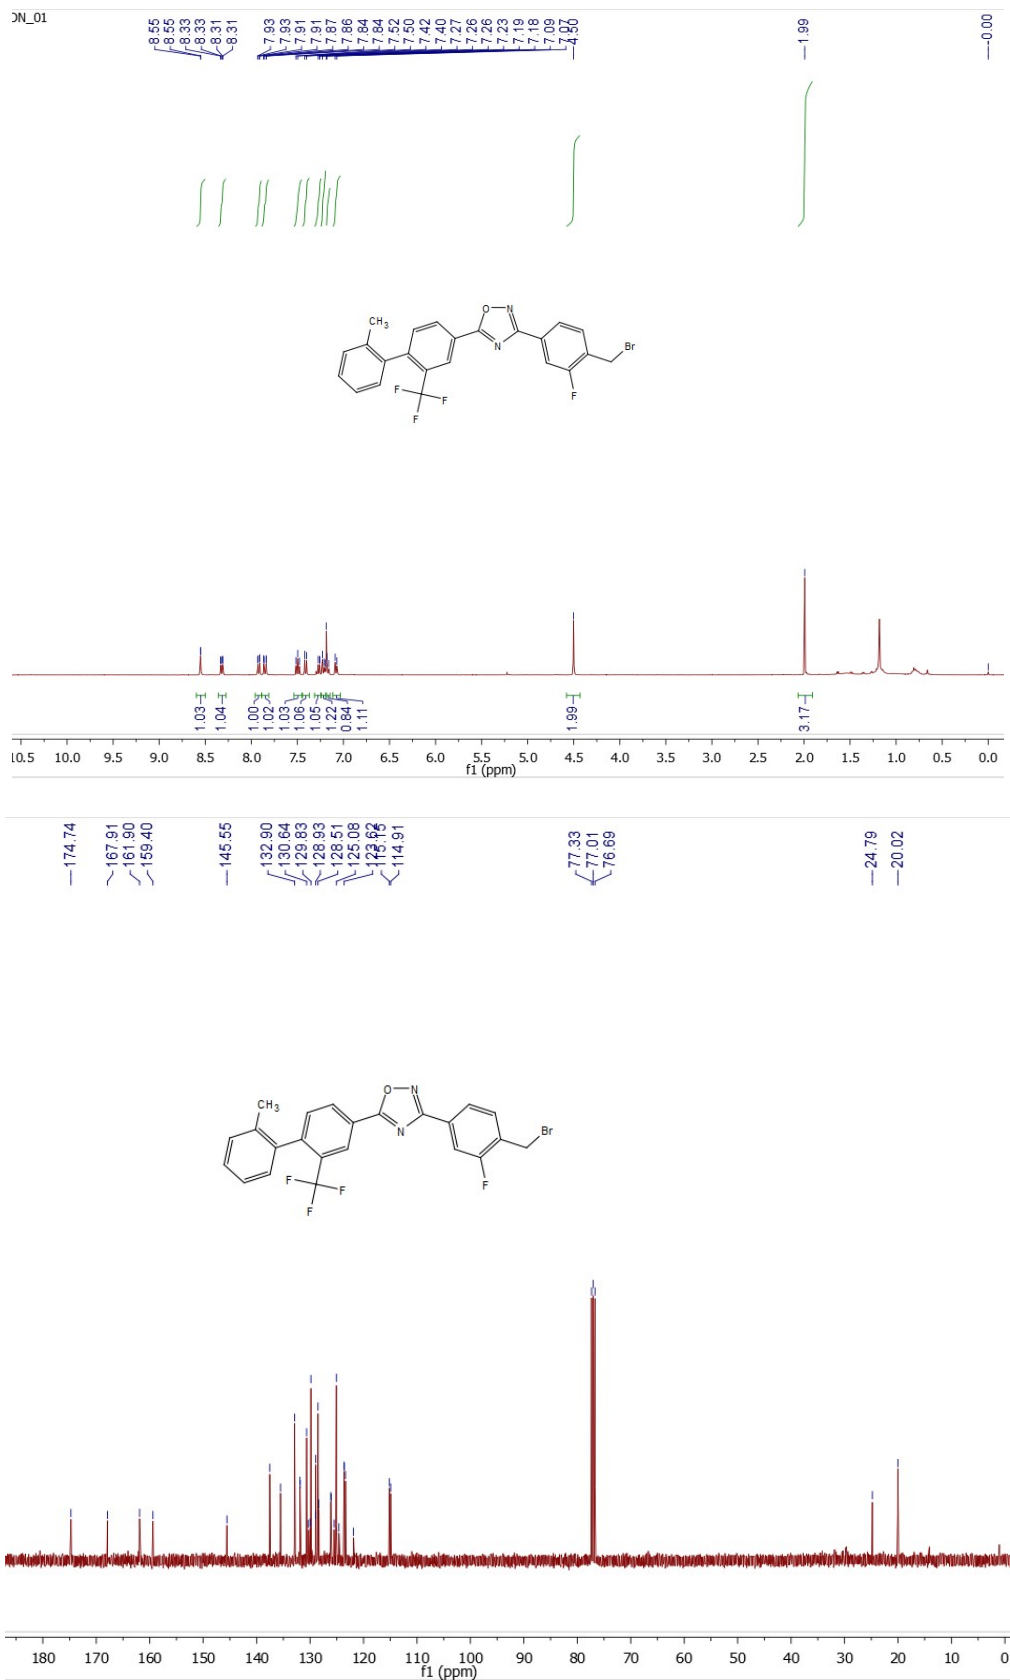

<sup>1</sup>H NMR and <sup>13</sup>C NMR of 17



Electronic Supplementary Information

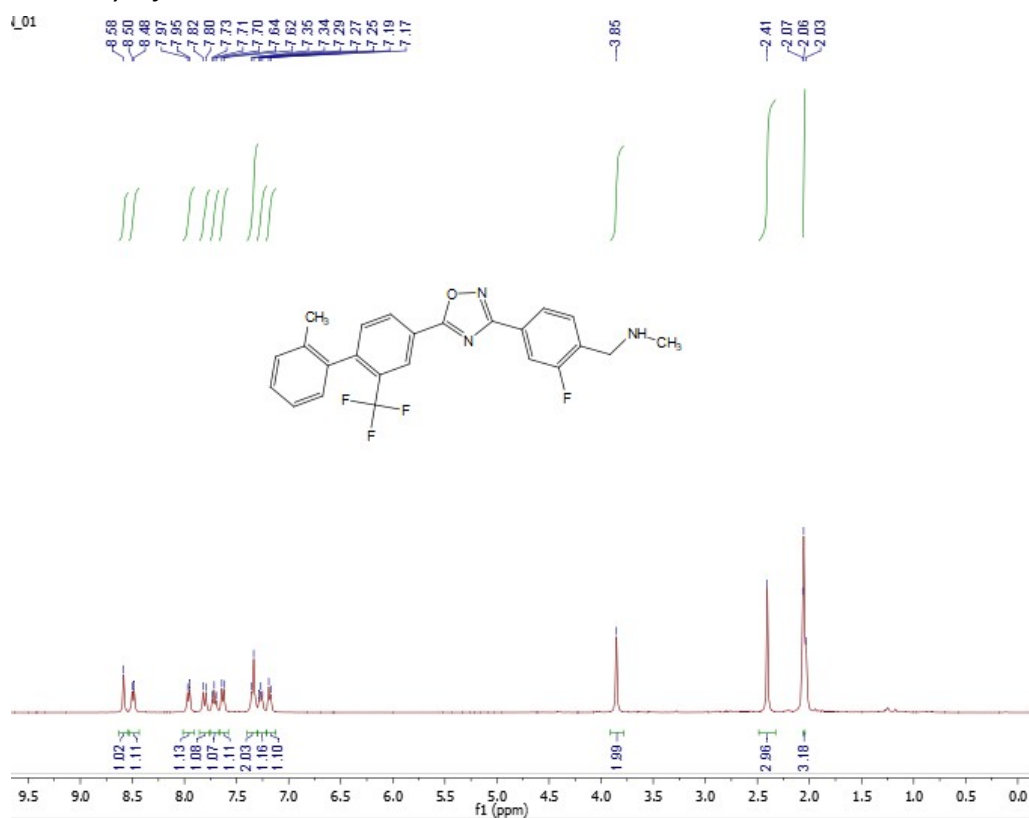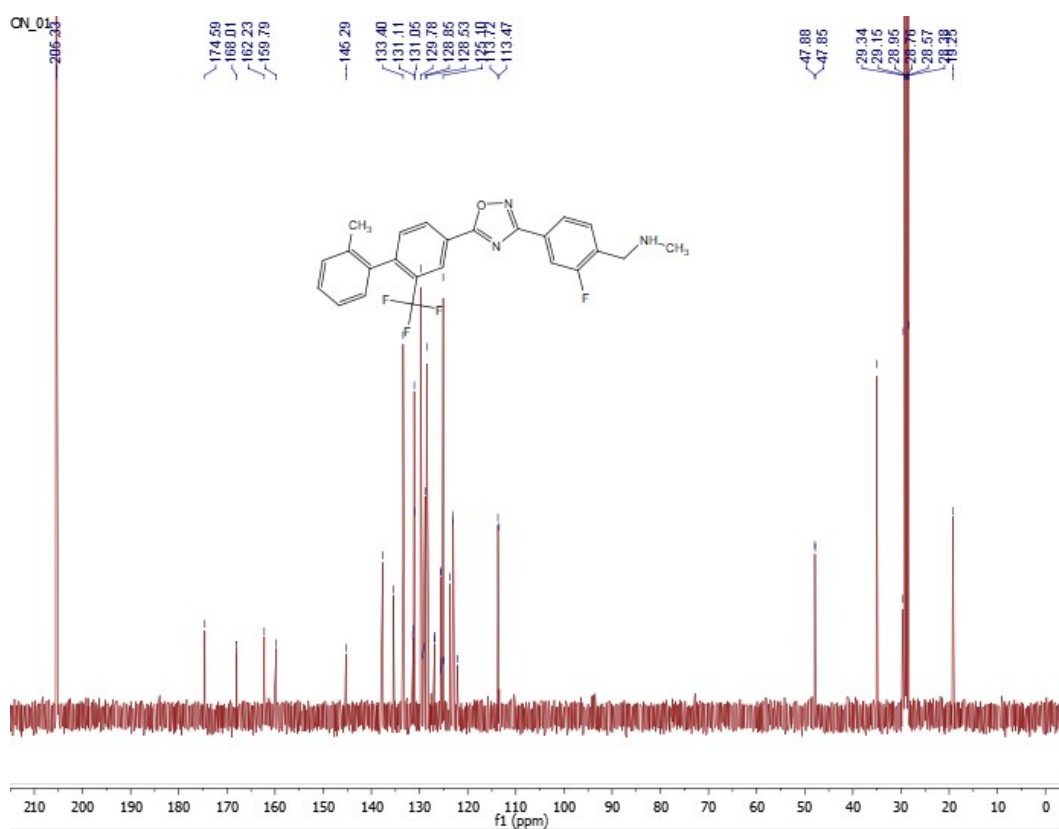

Electronic Supplementary Information

INE\_01

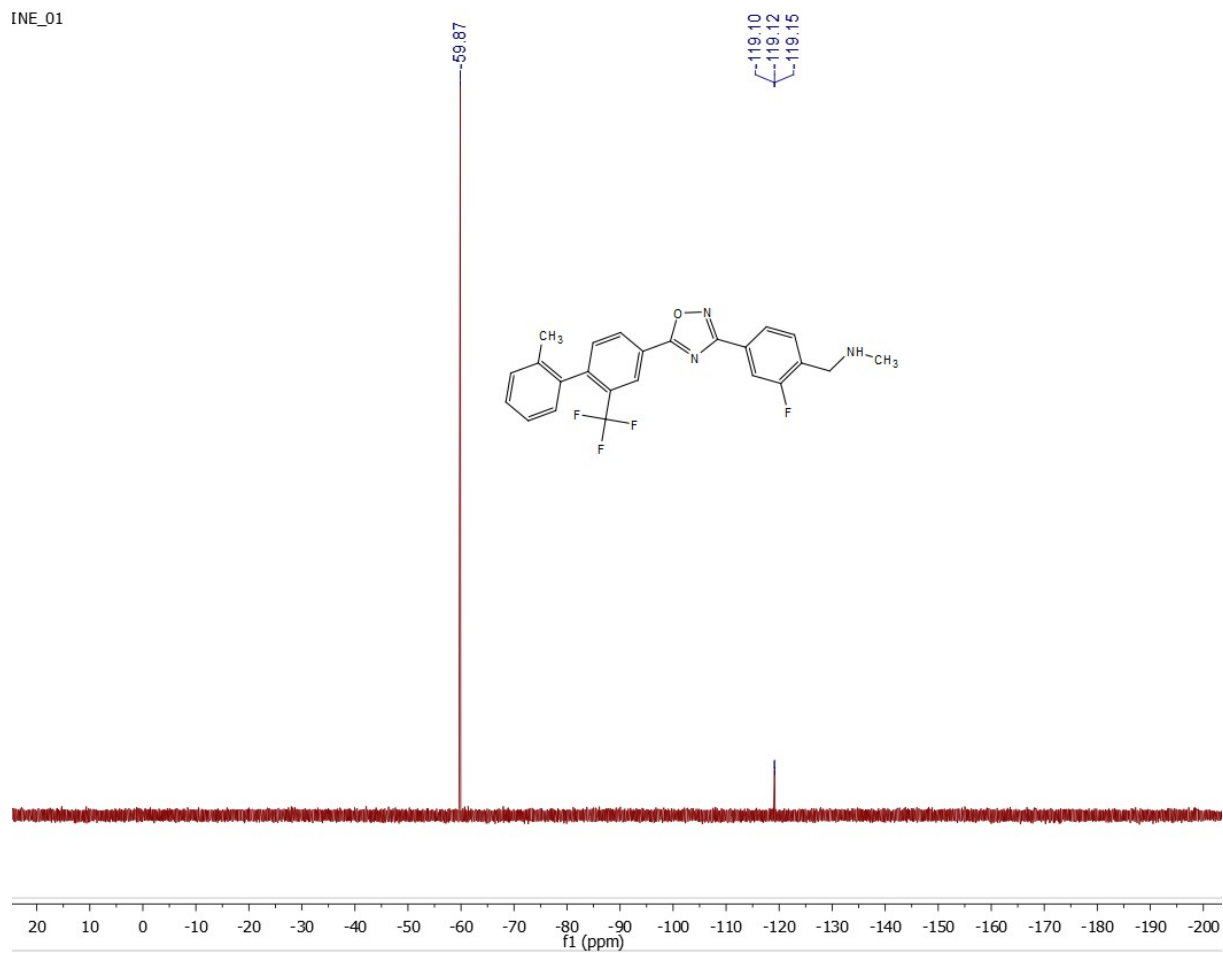

$^1\text{H}$  NMR,  $^{13}\text{C}$  NMR, and  $^{19}\text{F}$  NMR of **15b**

Electronic Supplementary Information

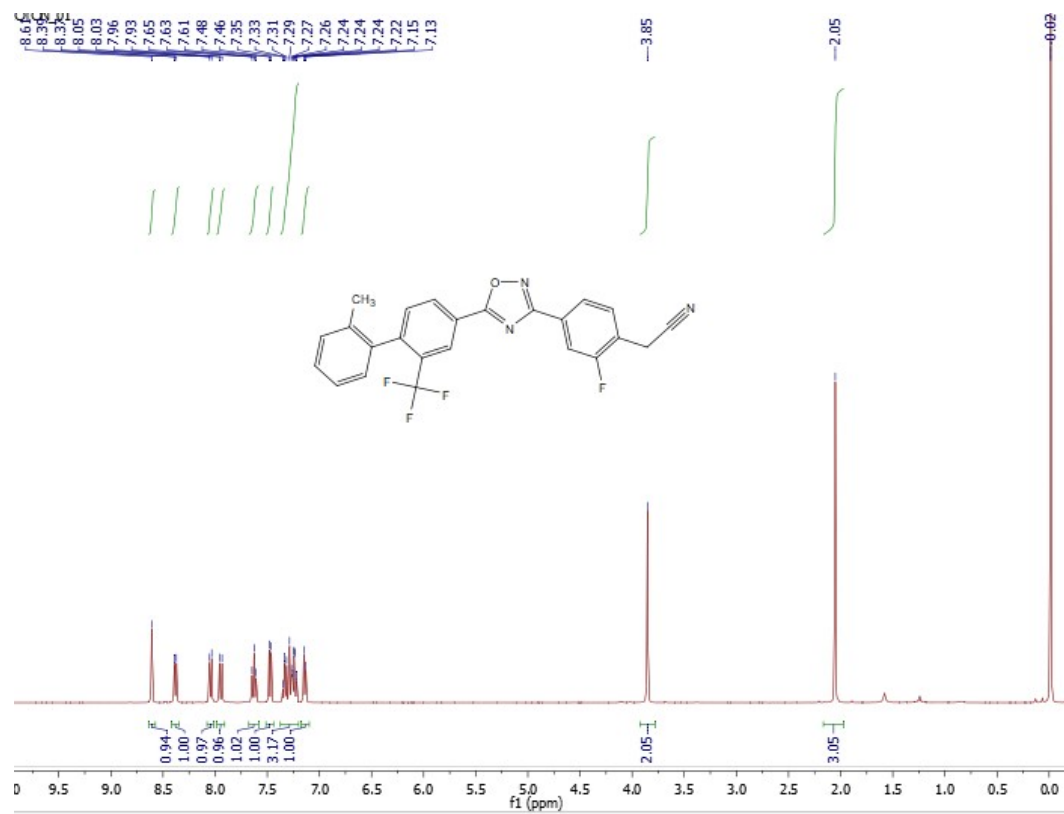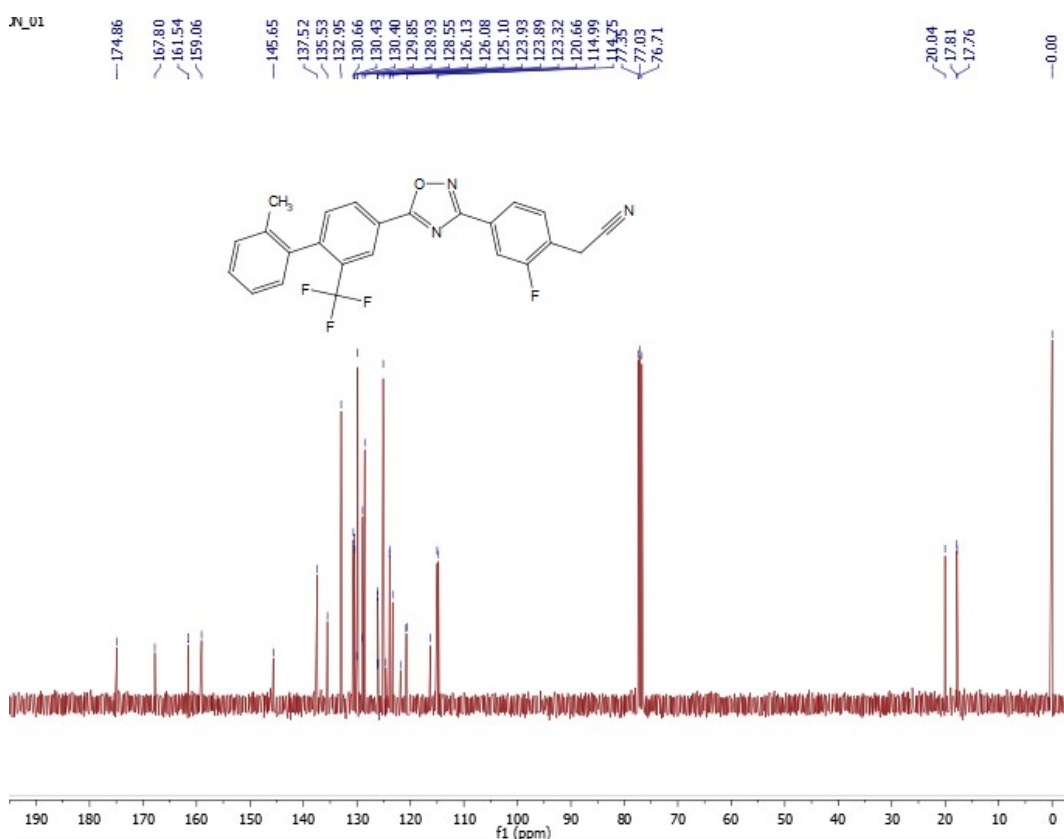

INE\_01

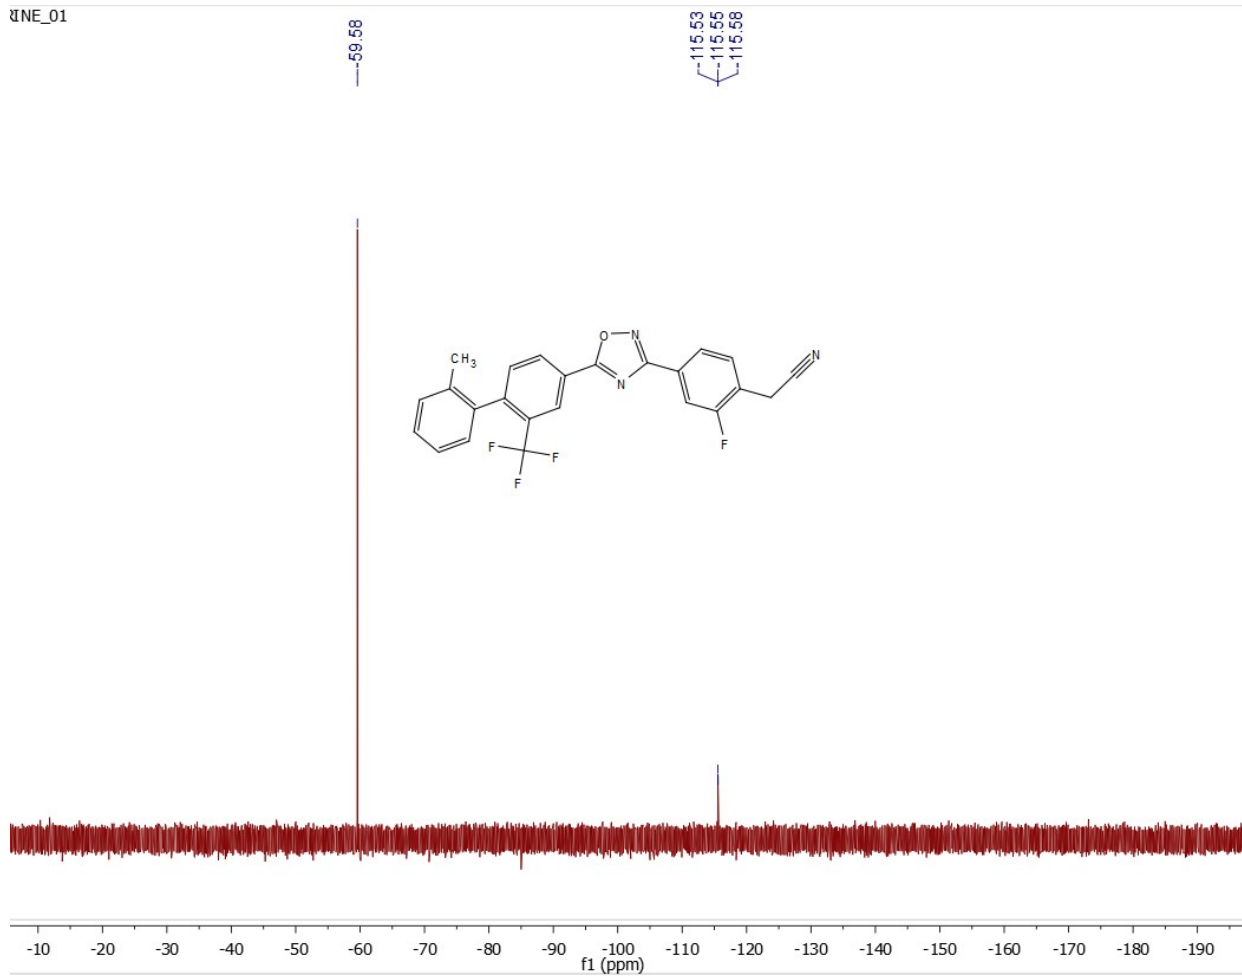

$^1\text{H}$  NMR,  $^{13}\text{C}$  NMR, and  $^{19}\text{F}$  NMR of **18a**

Electronic Supplementary Information

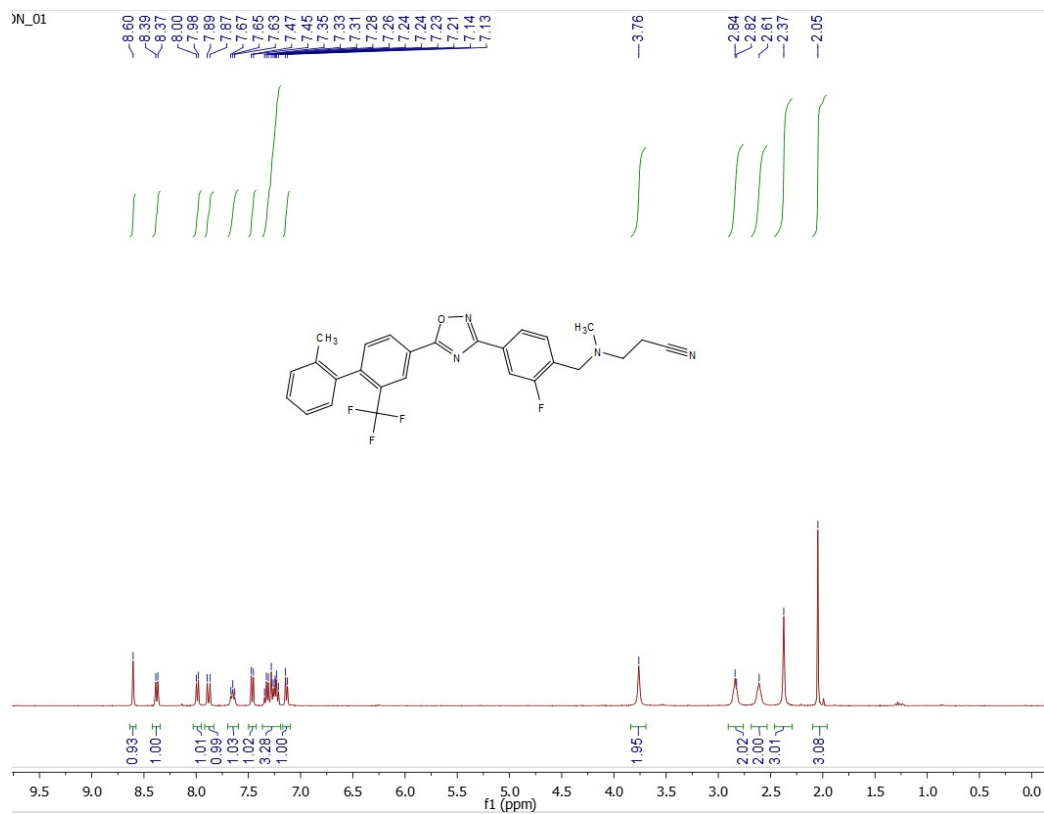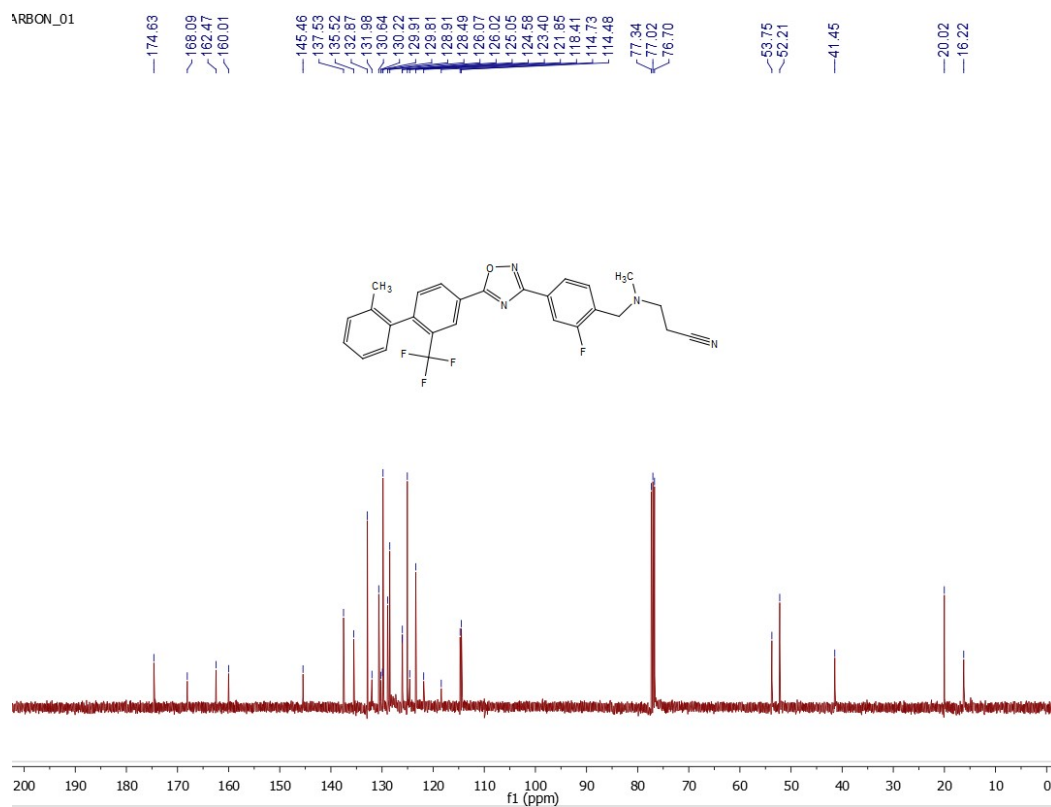

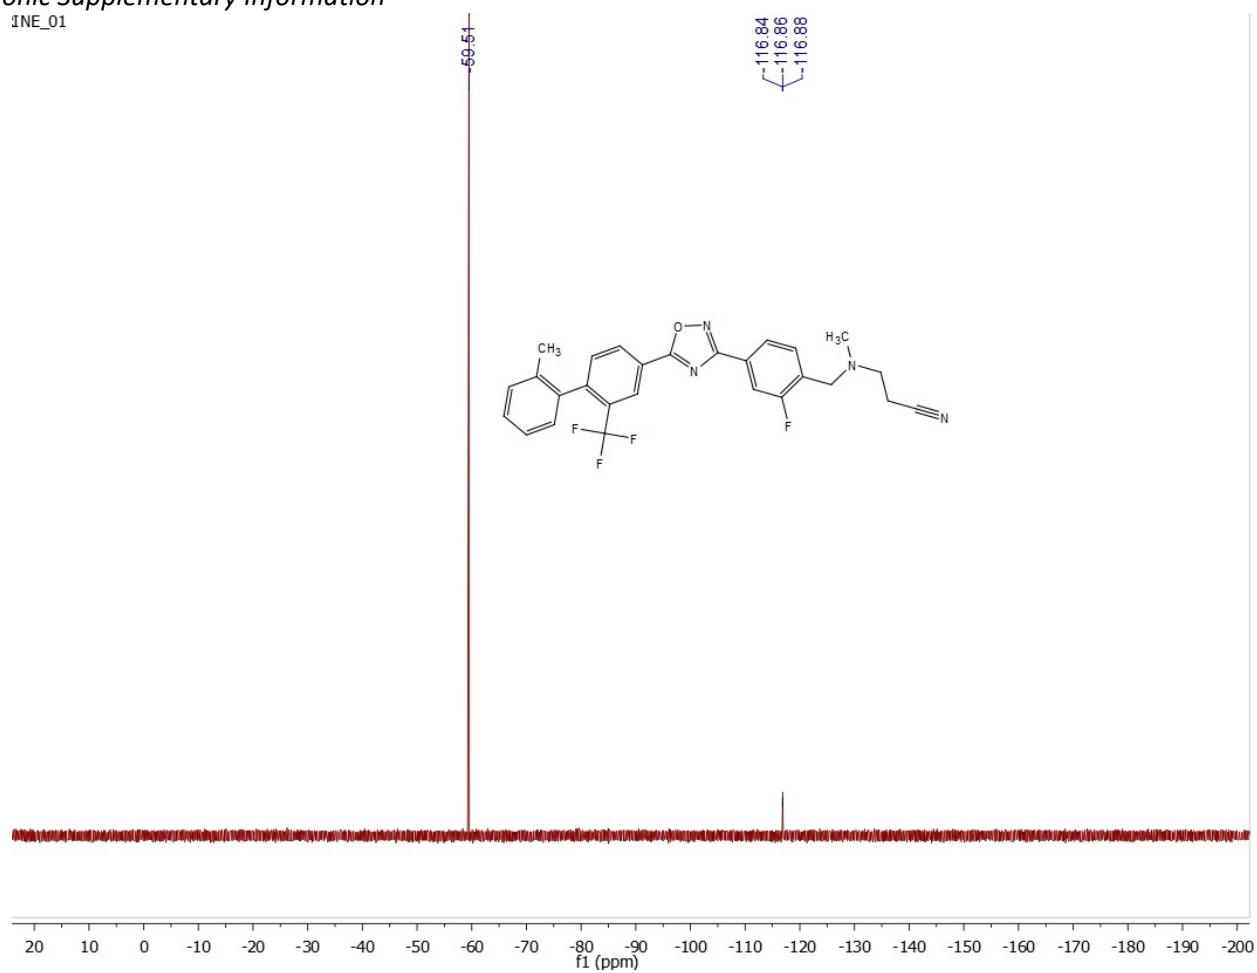 $^1\text{H}$  NMR,  $^{13}\text{C}$  NMR, and  $^{19}\text{F}$  NMR of **18b**

Electronic Supplementary Information

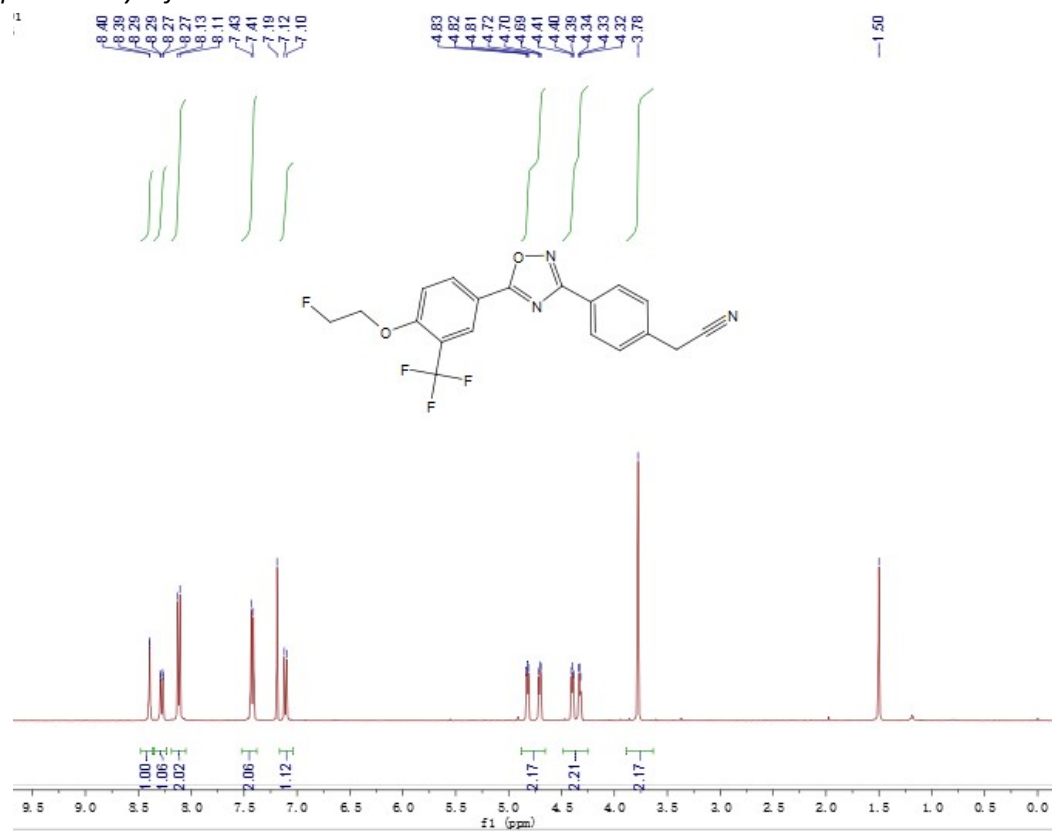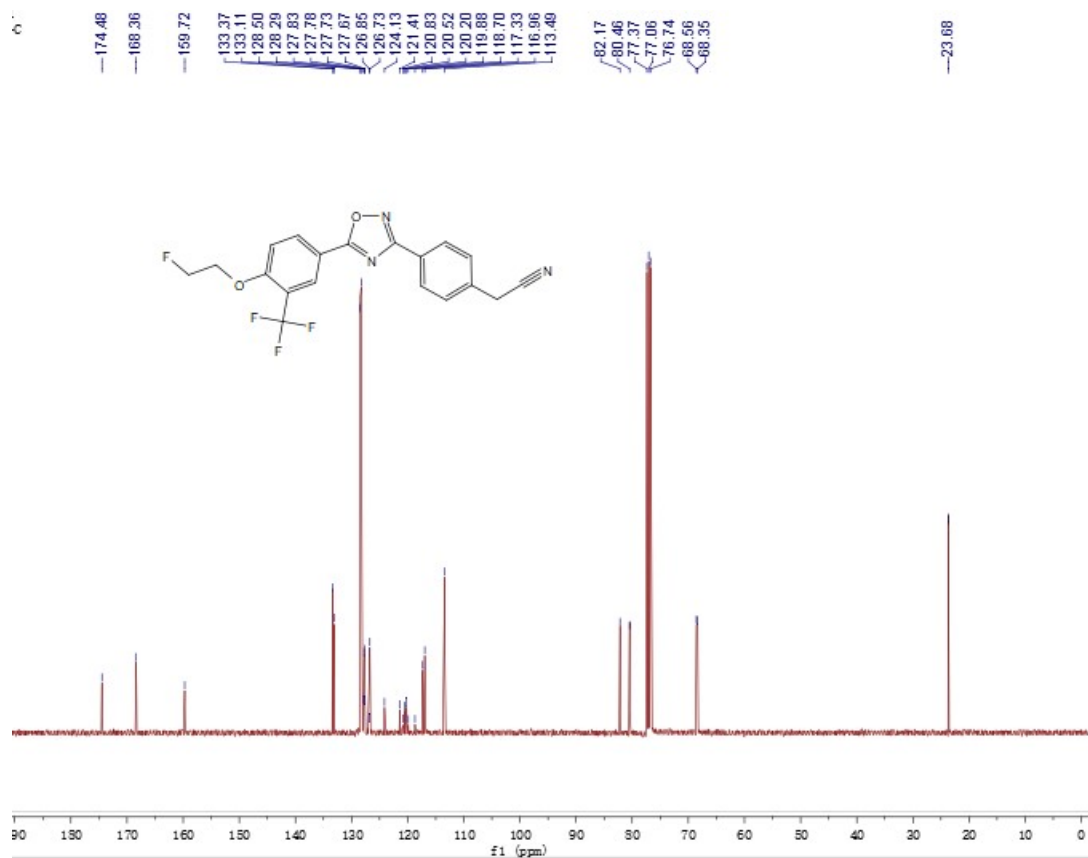

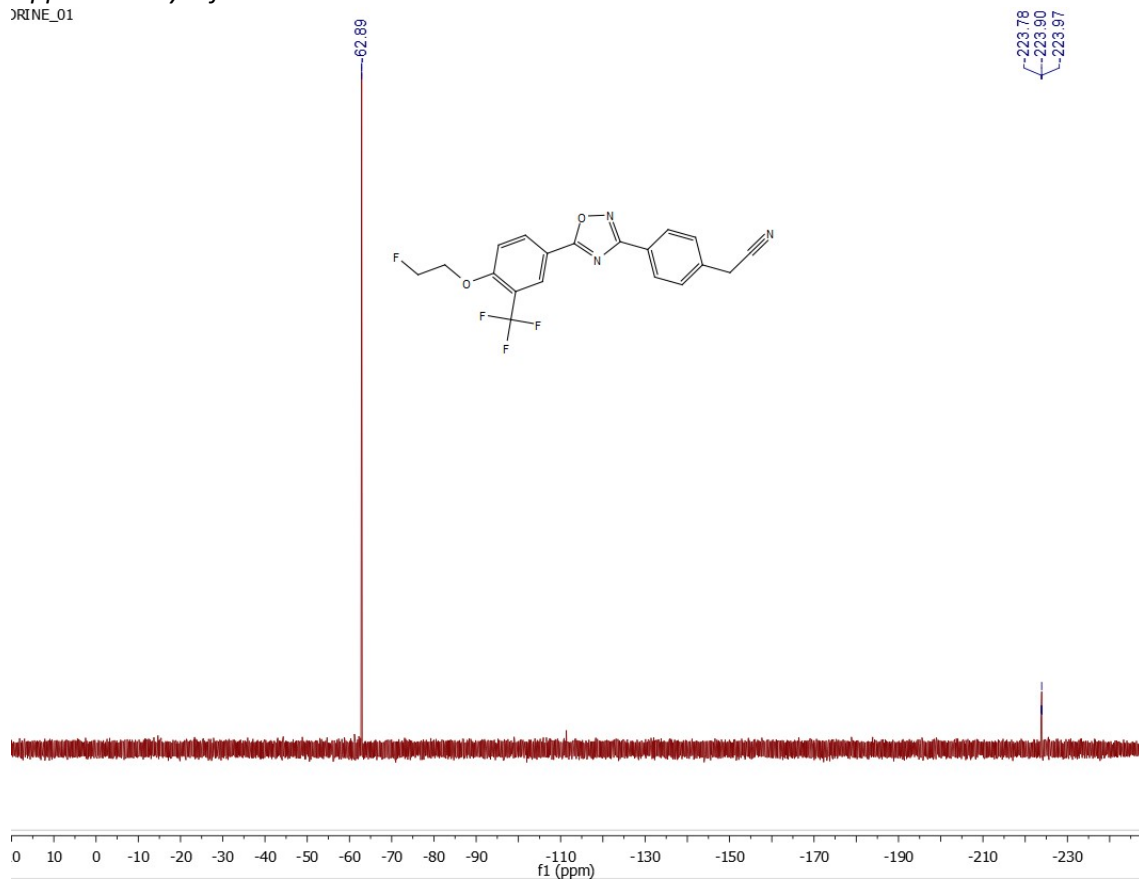 $^1\text{H}$  NMR,  $^{13}\text{C}$  NMR, and  $^{19}\text{F}$  NMR of **18c**



Electronic Supplementary Information

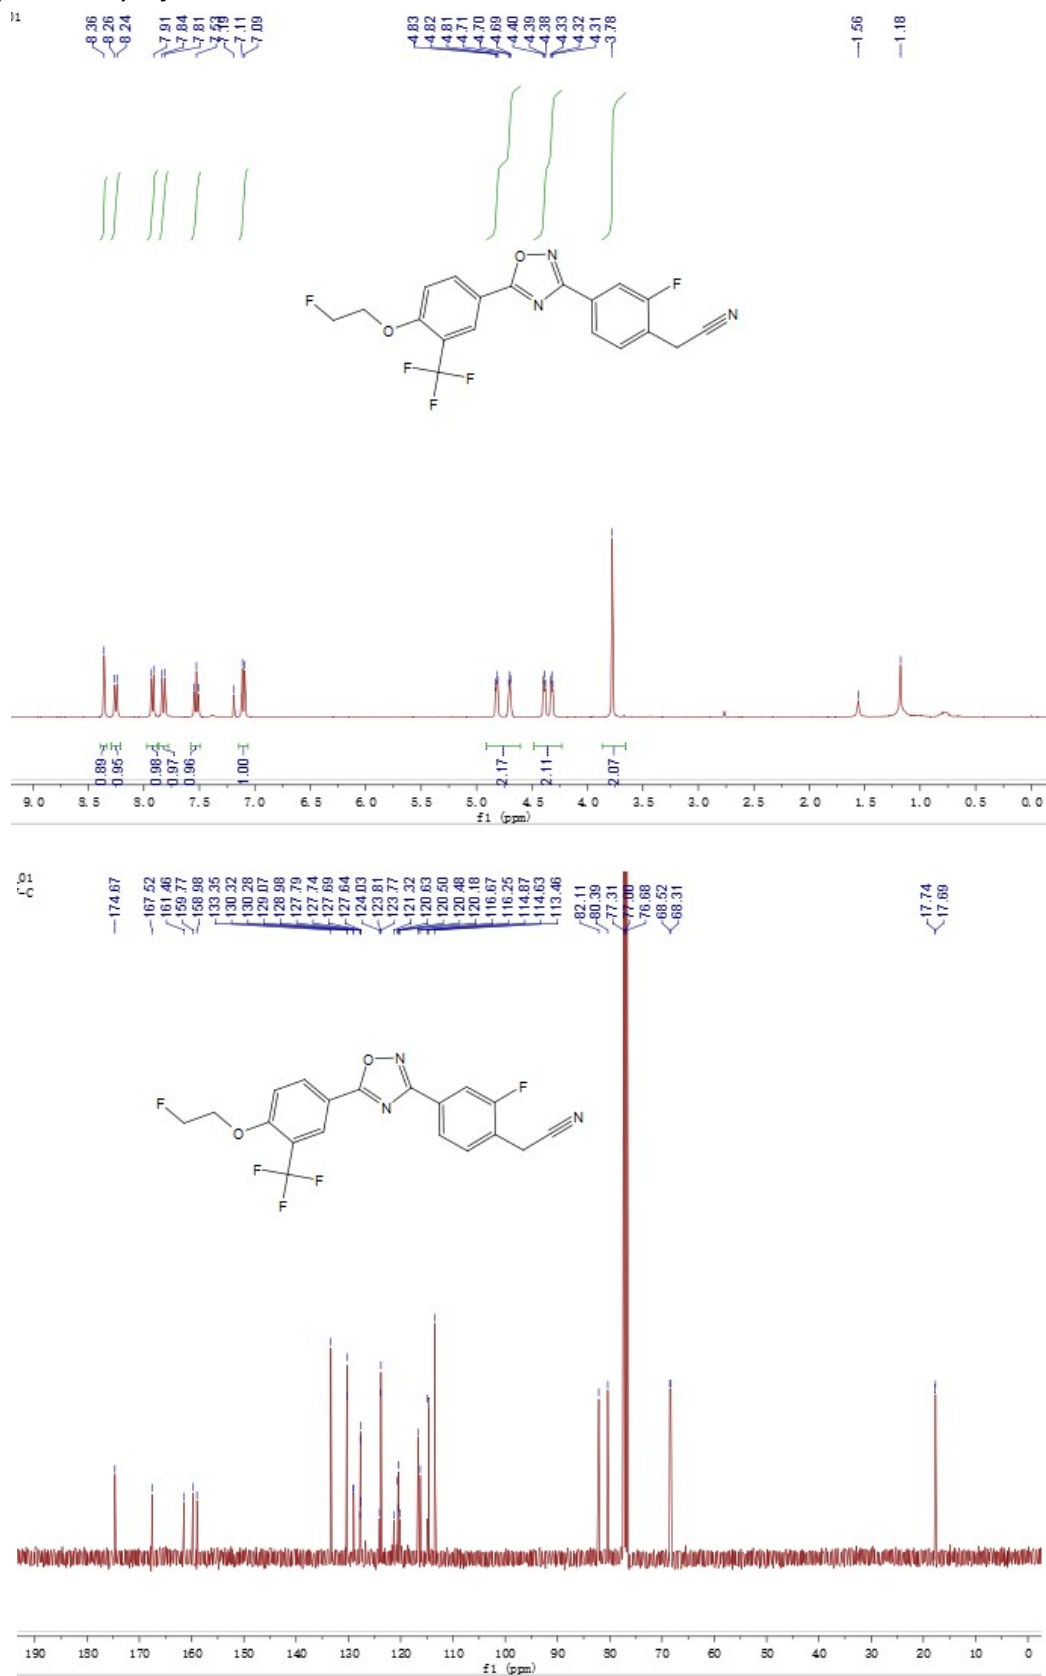

<sup>1</sup>H NMR and <sup>13</sup>C NMR of **18d**

Electronic Supplementary Information

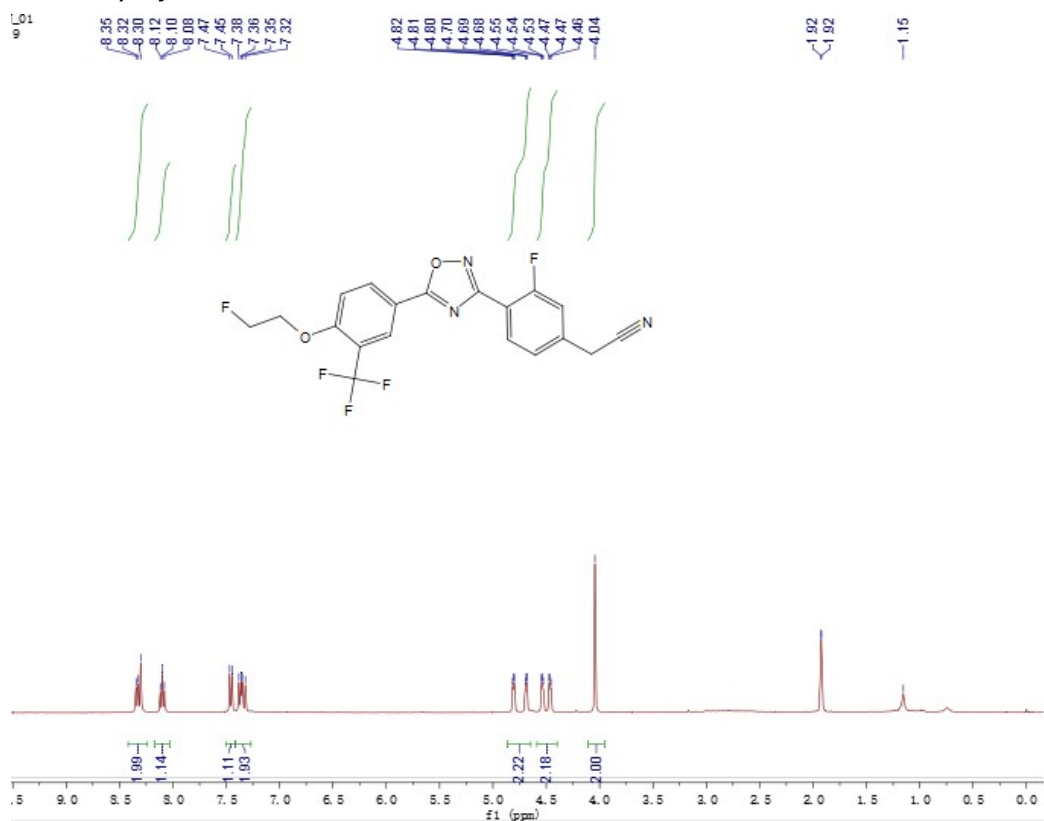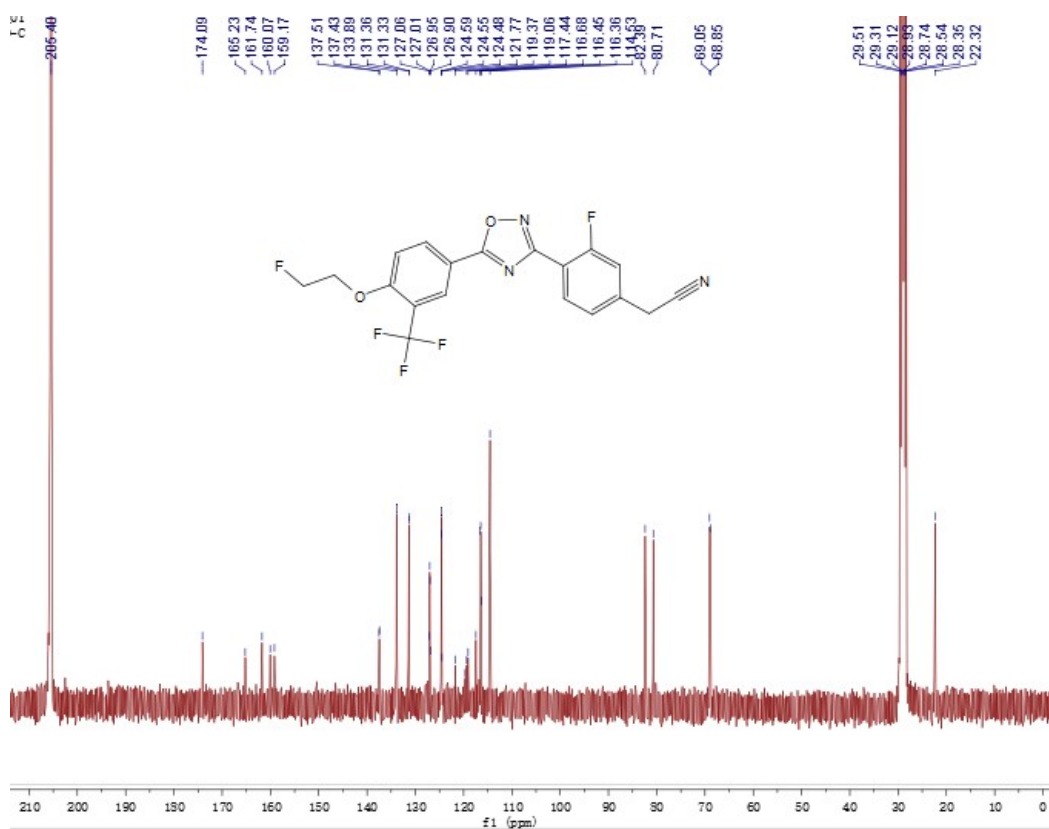

<sup>1</sup>H NMR and <sup>13</sup>C NMR of **18e**

Electronic Supplementary Information

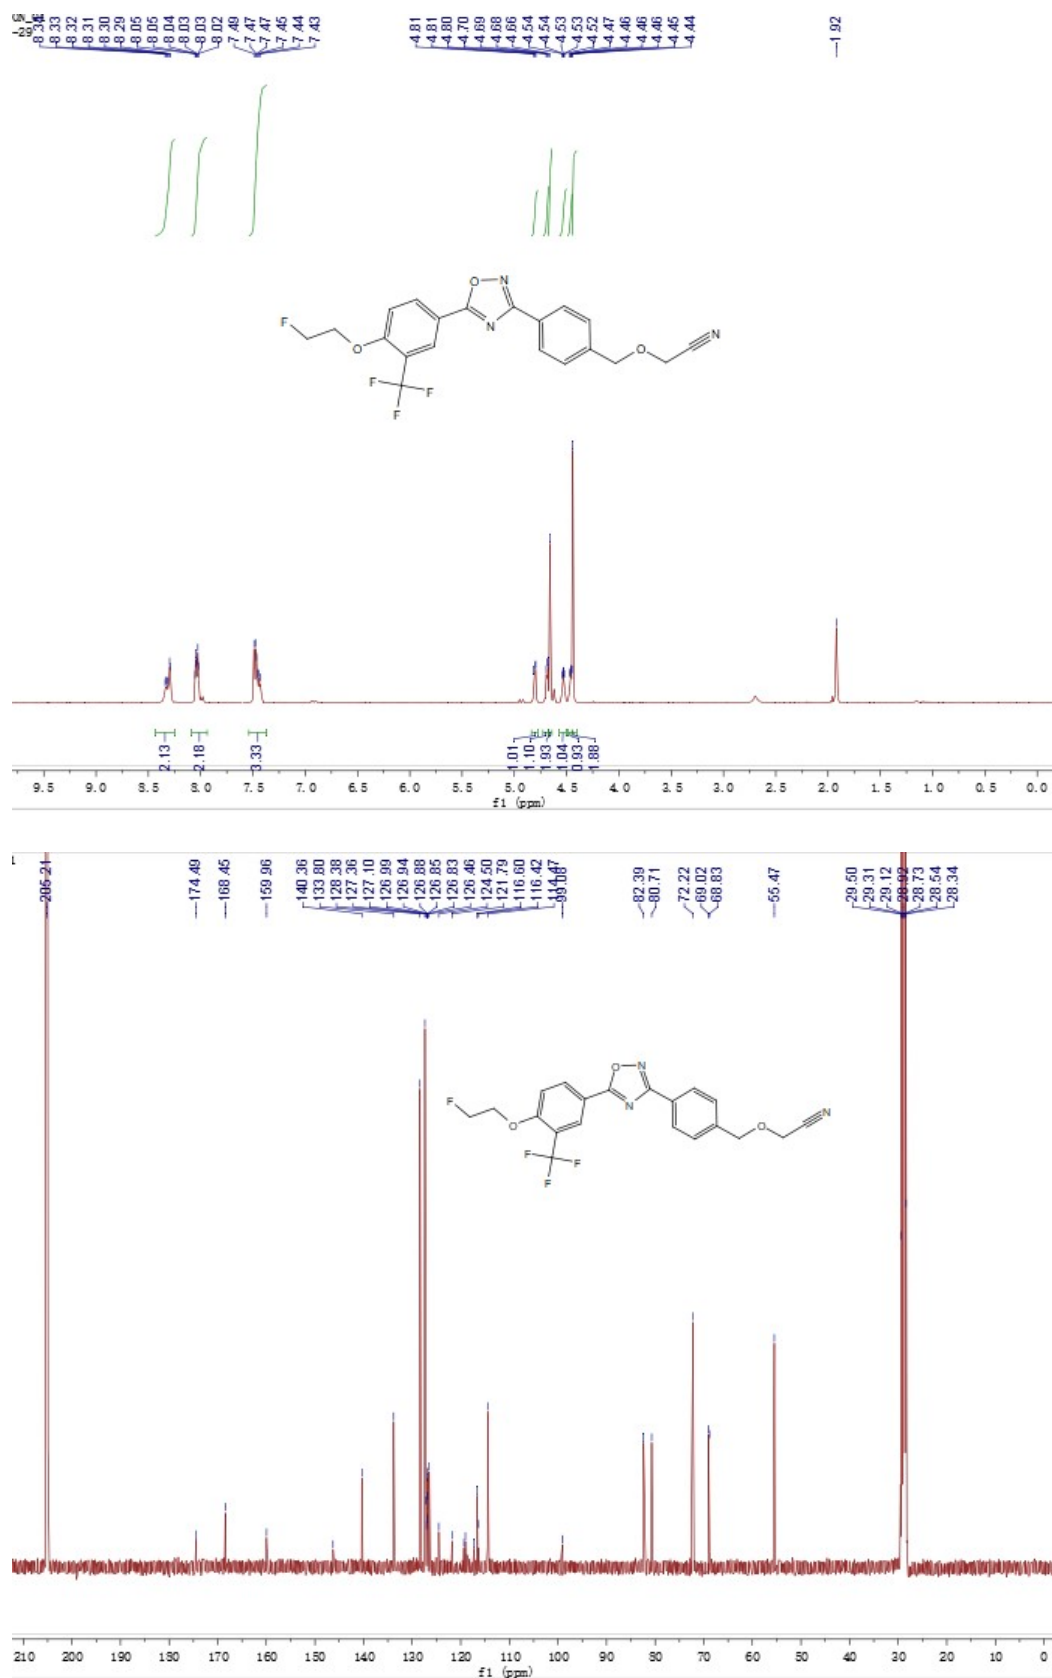

<sup>1</sup>H NMR and <sup>13</sup>C NMR of **18f**

Electronic Supplementary Information

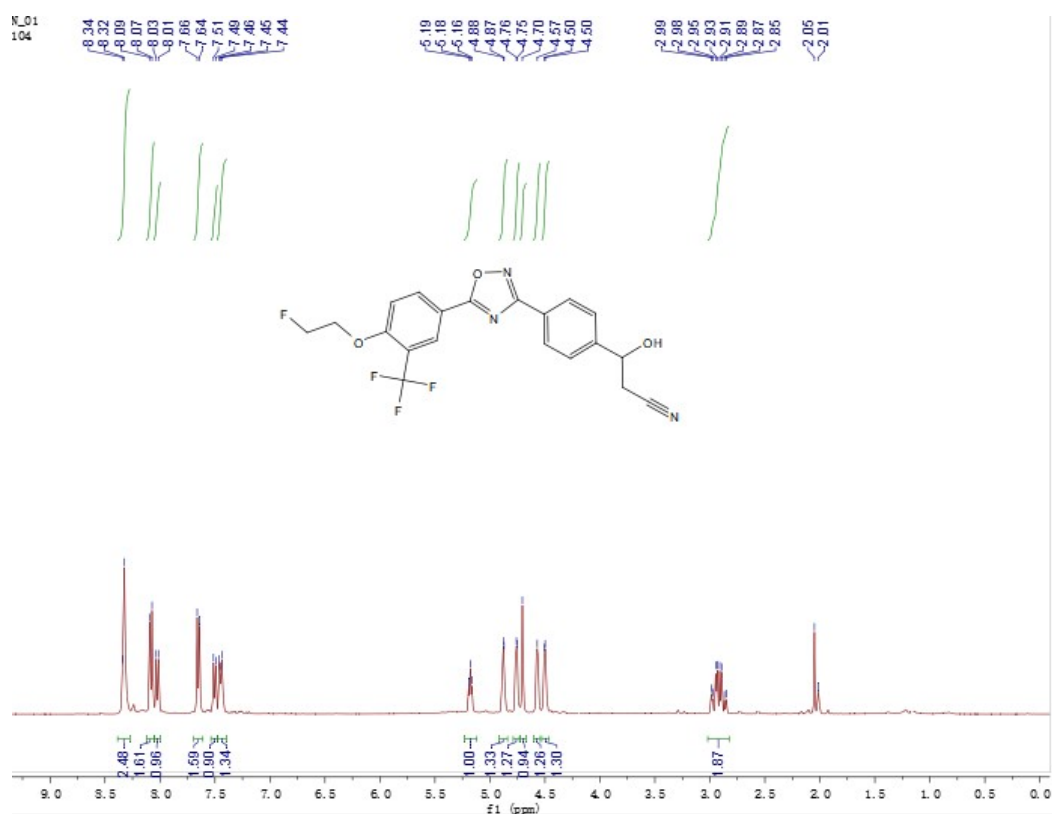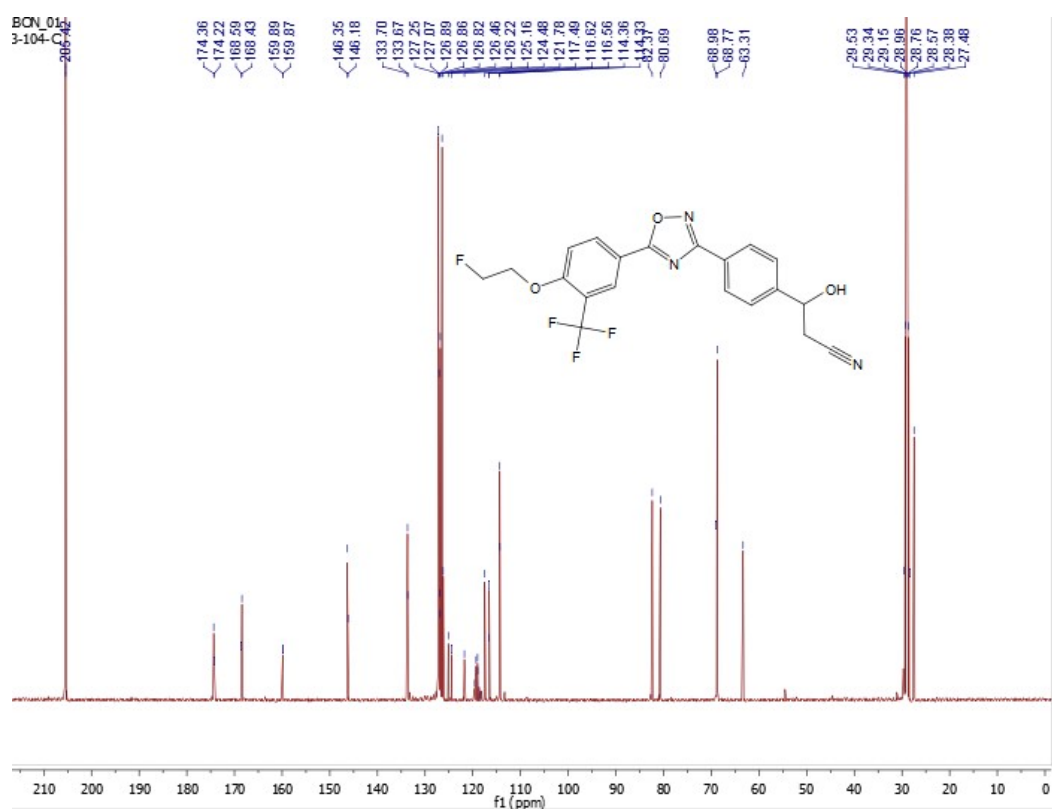

<sup>1</sup>H NMR and <sup>13</sup>C NMR of **18g**

Electronic Supplementary Information

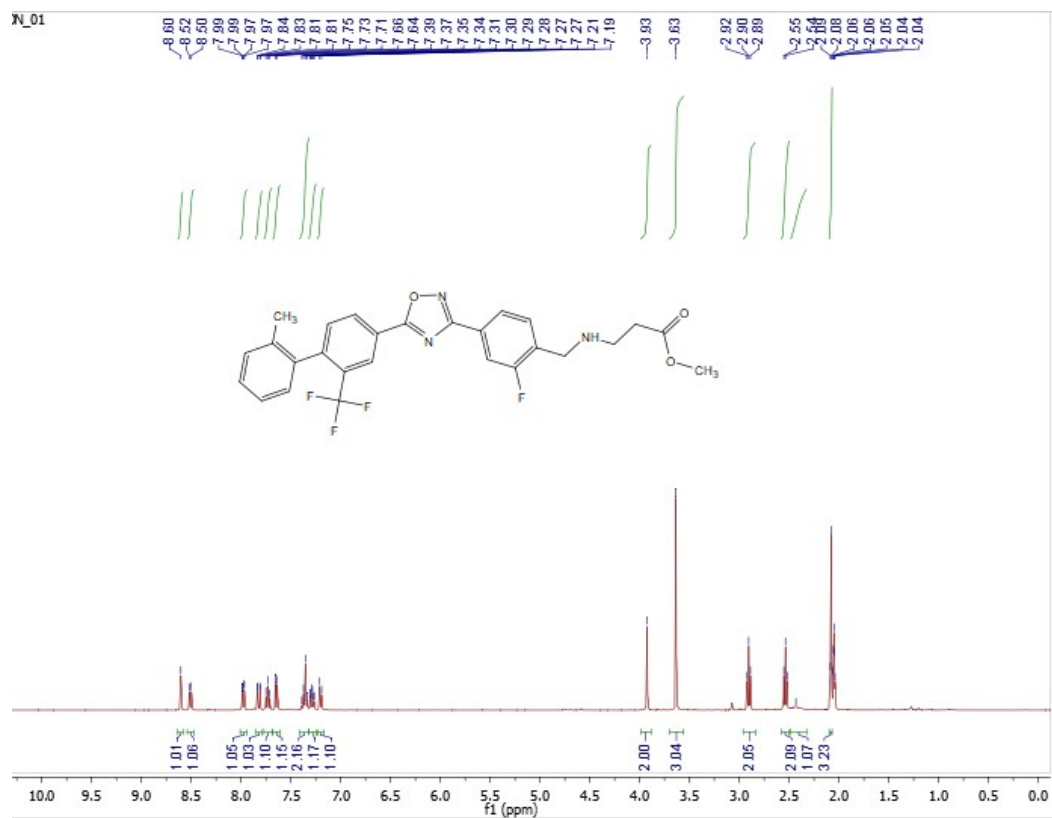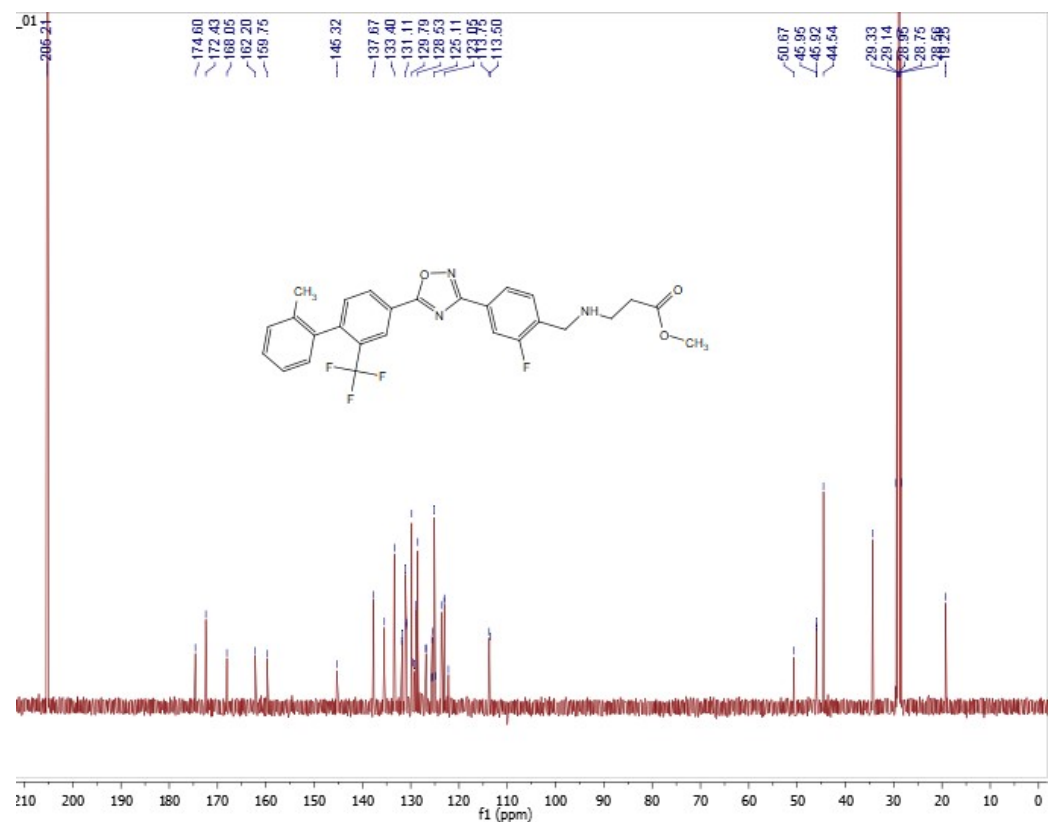

$^1\text{H}$  NMR and  $^{13}\text{C}$  NMR of 22c

Electronic Supplementary Information

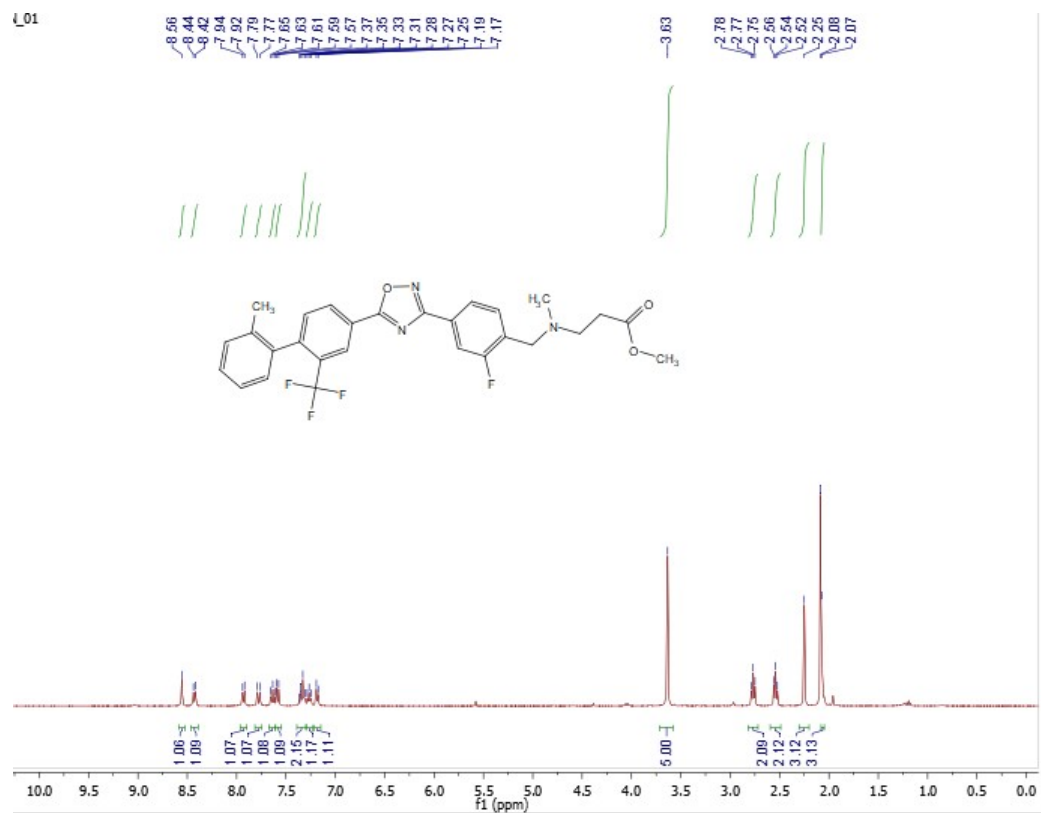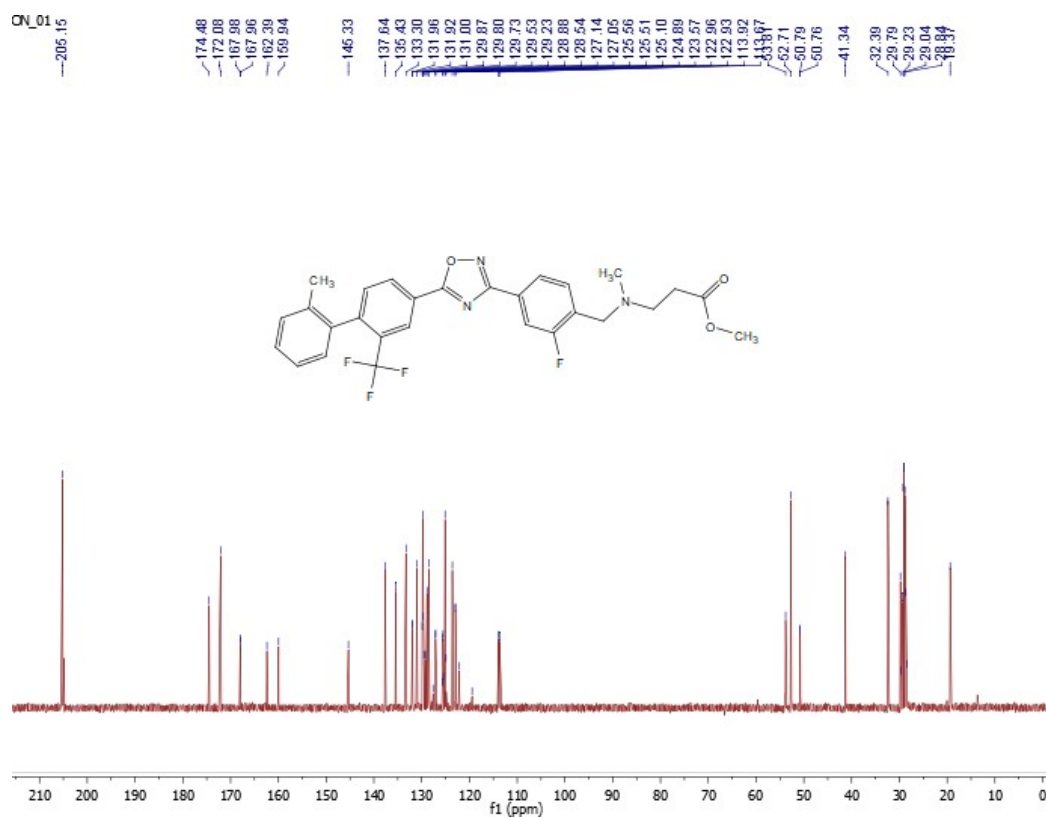

$^1\text{H}$  NMR and  $^{13}\text{C}$  NMR of 23c

Electronic Supplementary Information

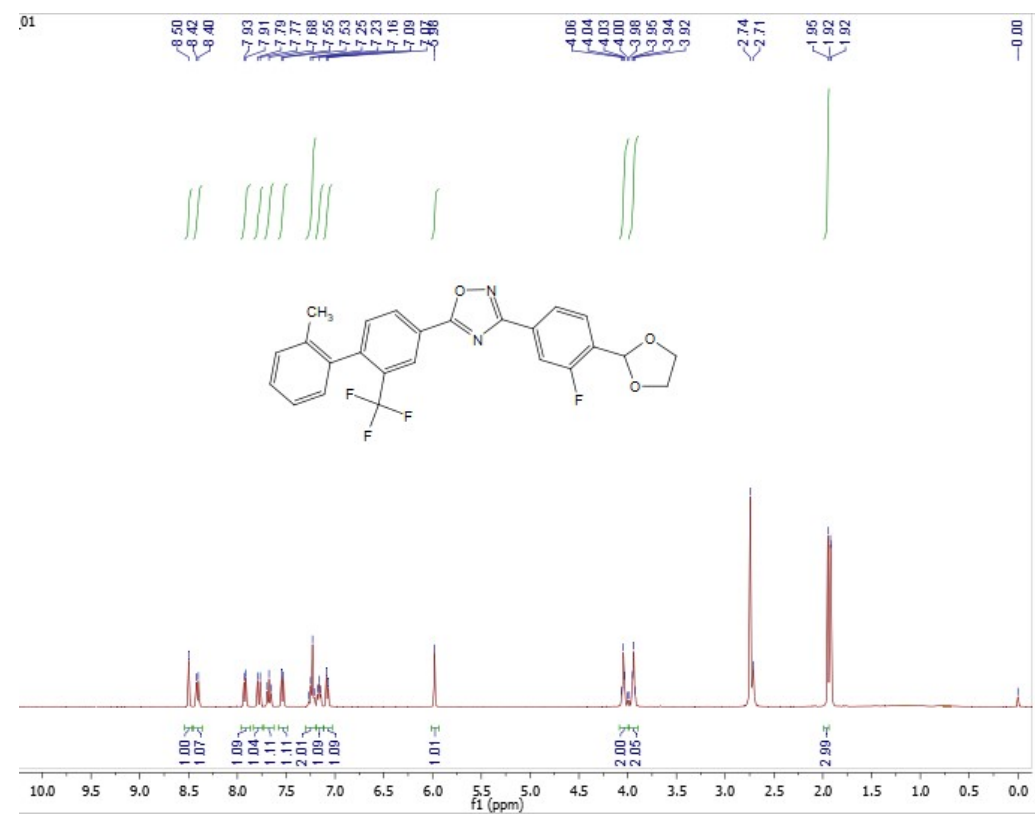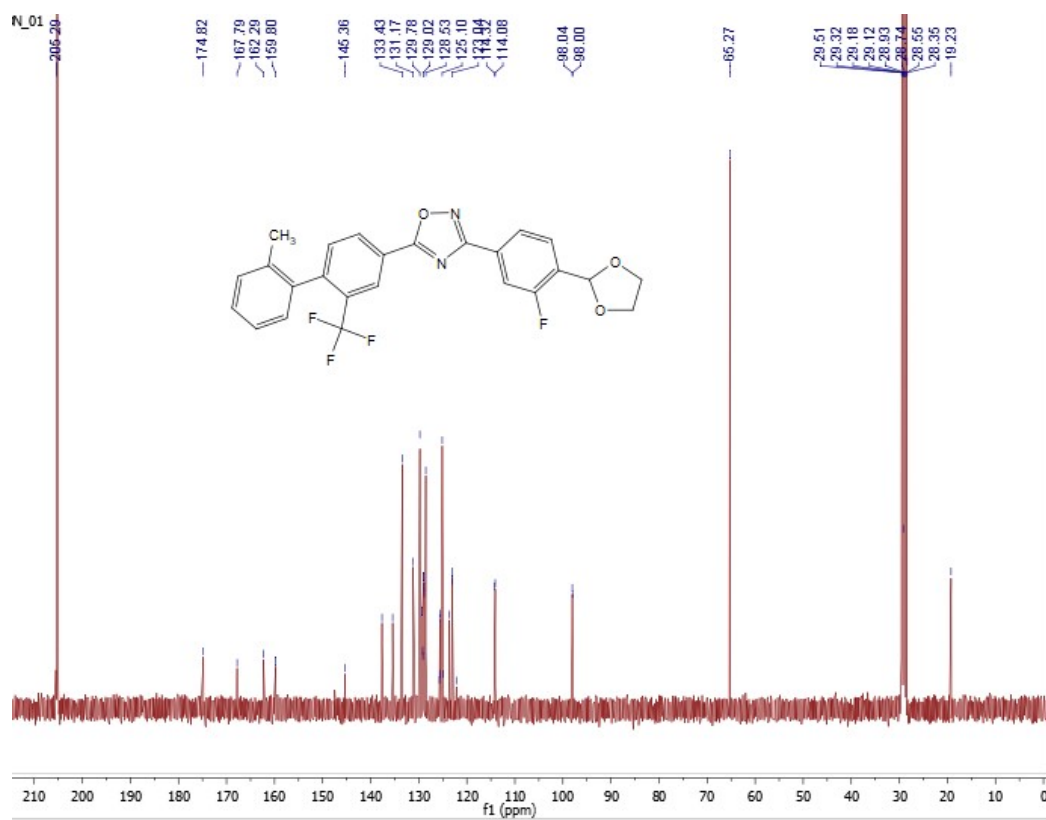

$^1\text{H NMR}$  and  $^{13}\text{C NMR}$  of **24a**

Electronic Supplementary Information

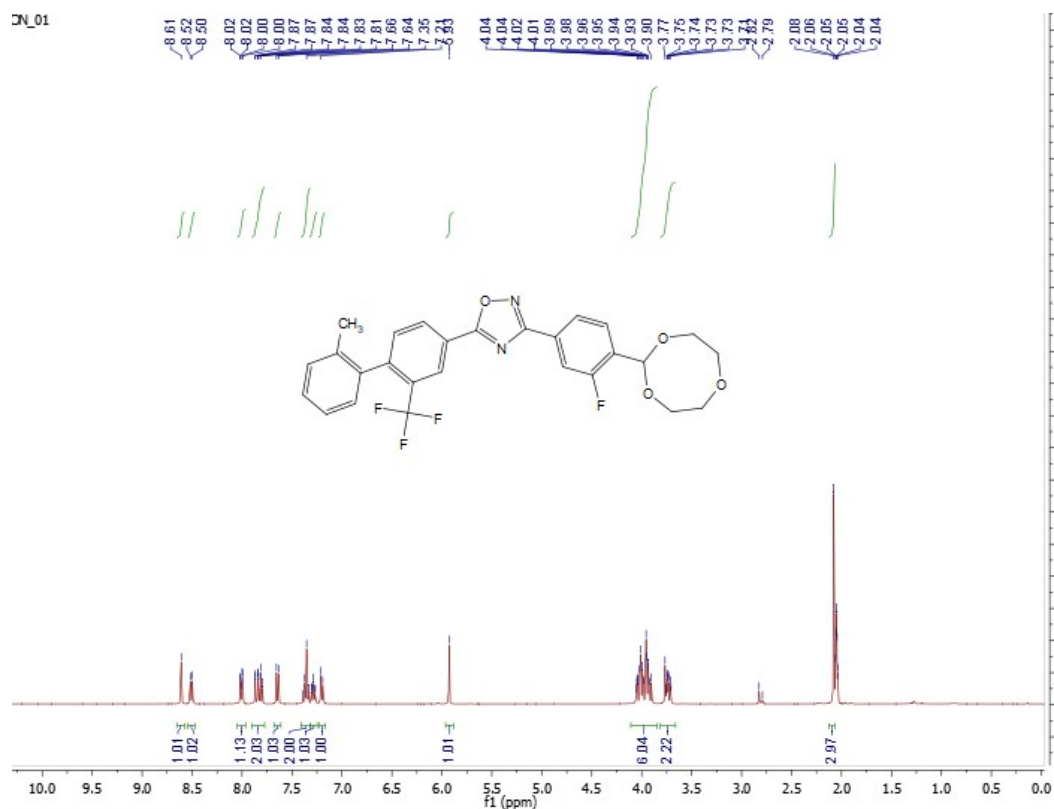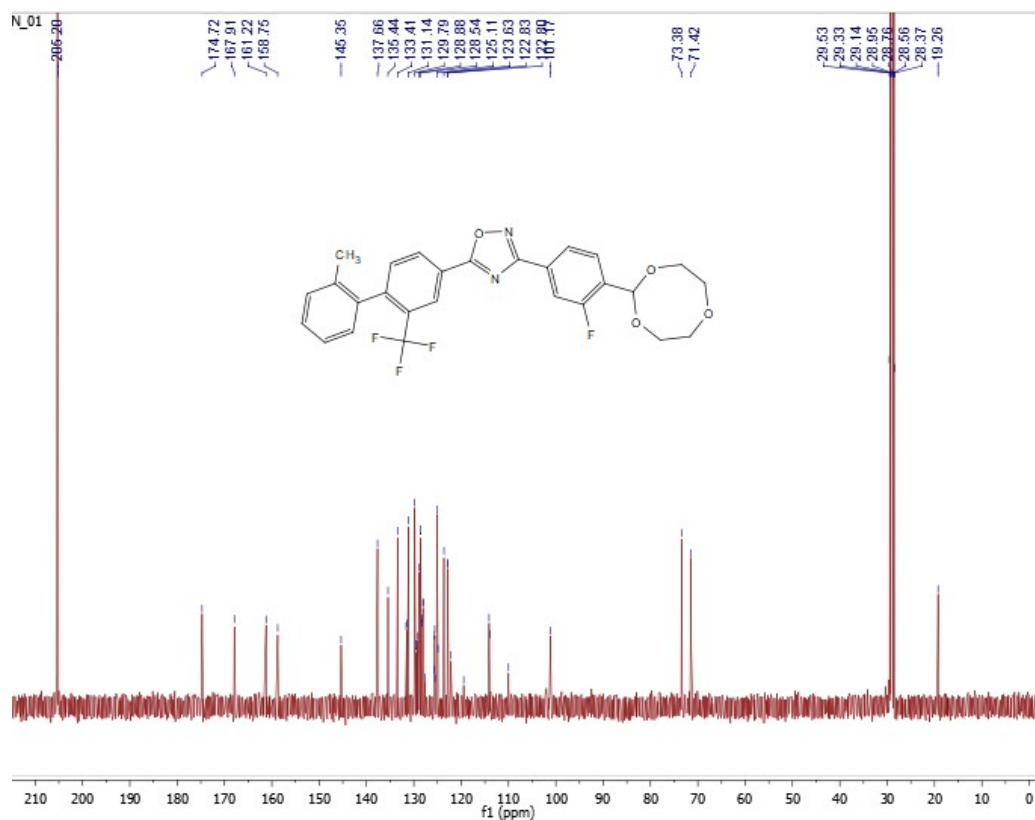

$^1\text{H}$  NMR and  $^{13}\text{C}$  NMR of **24b**



Electronic Supplementary Information

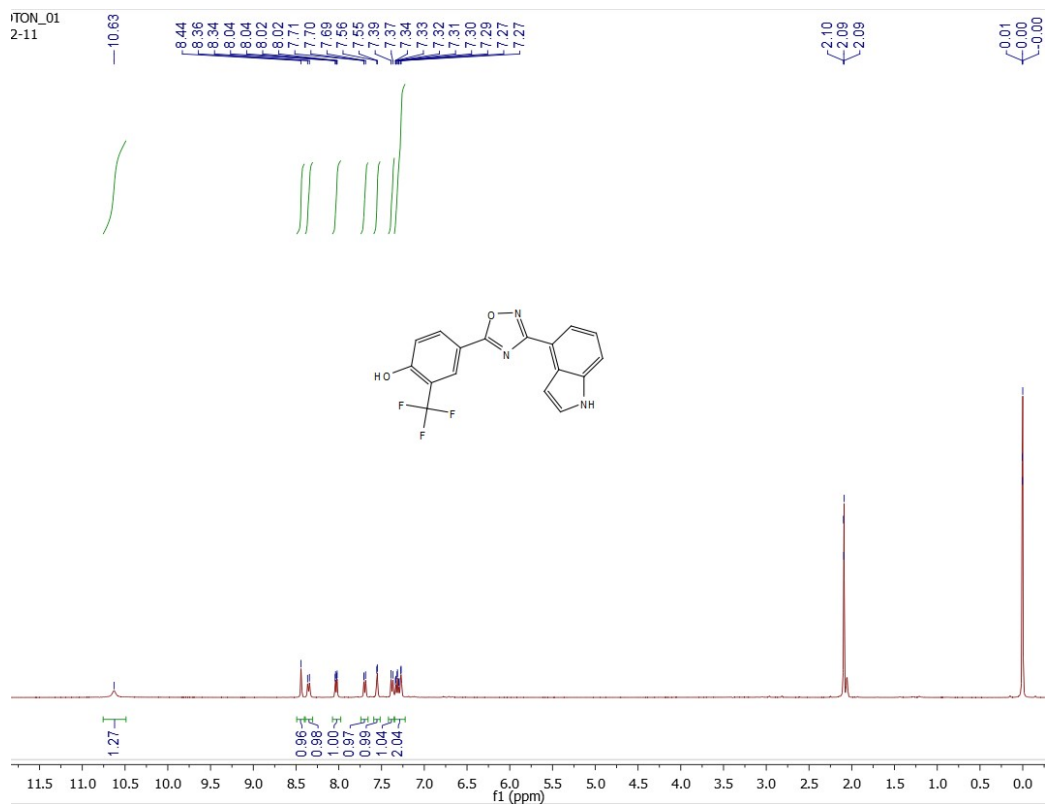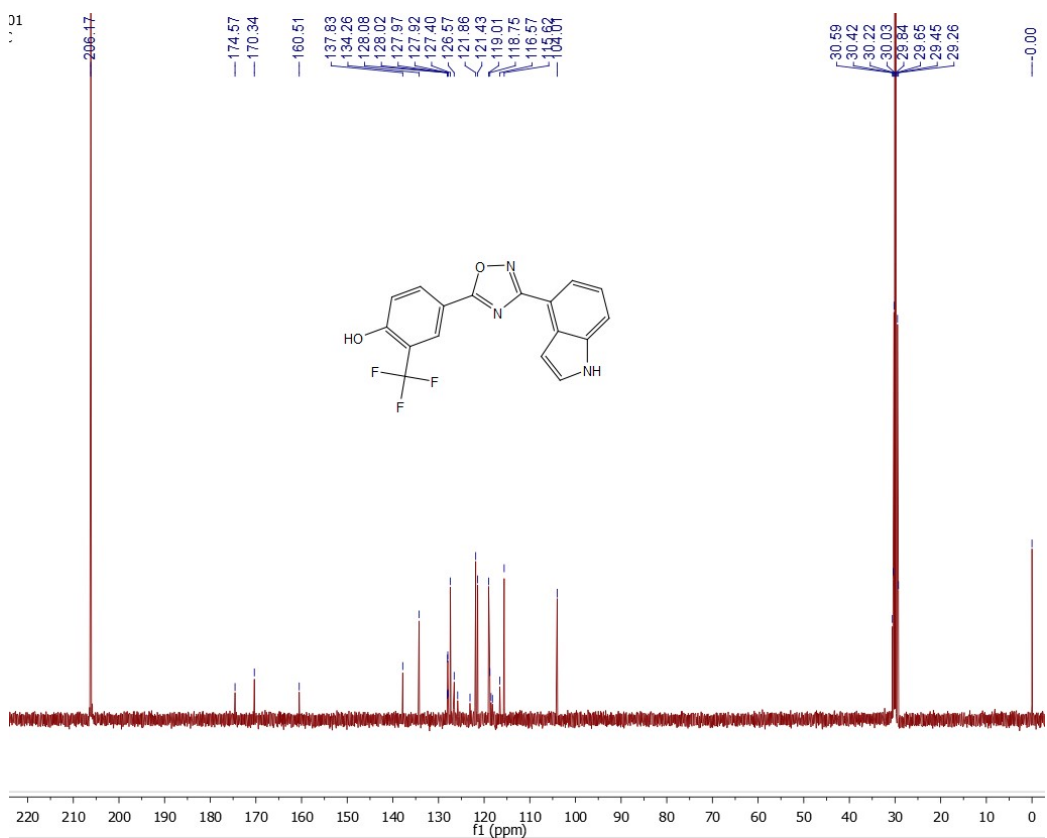

<sup>1</sup>H NMR and <sup>13</sup>C NMR of **26**

Electronic Supplementary Information

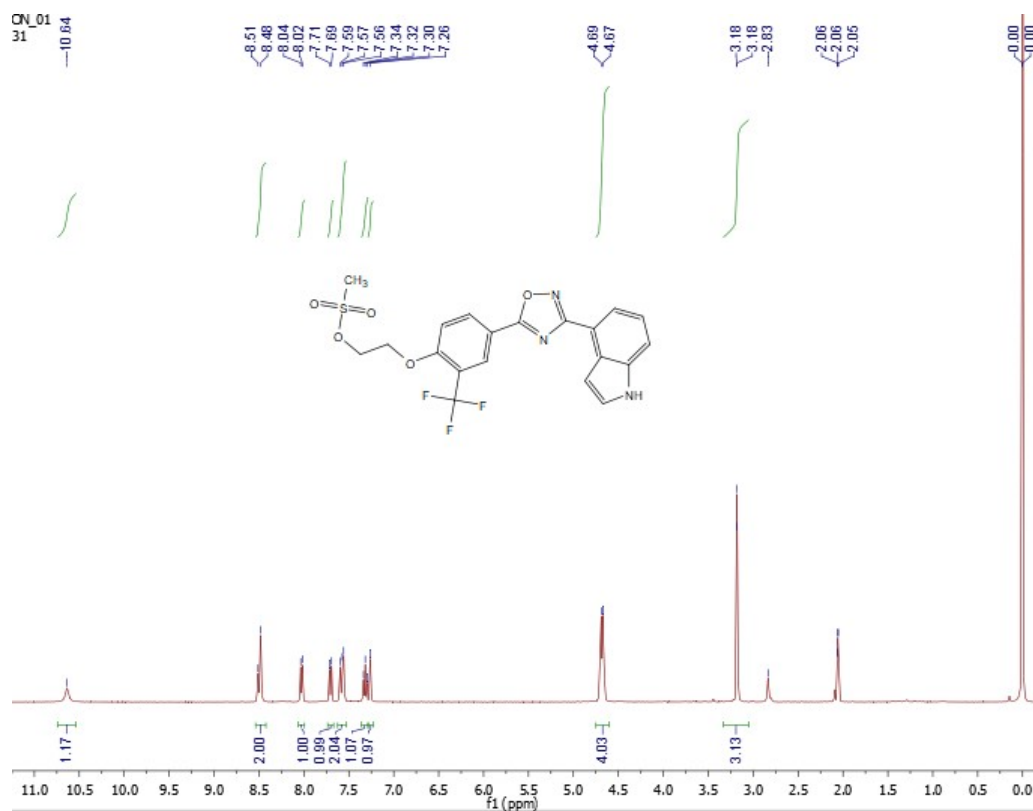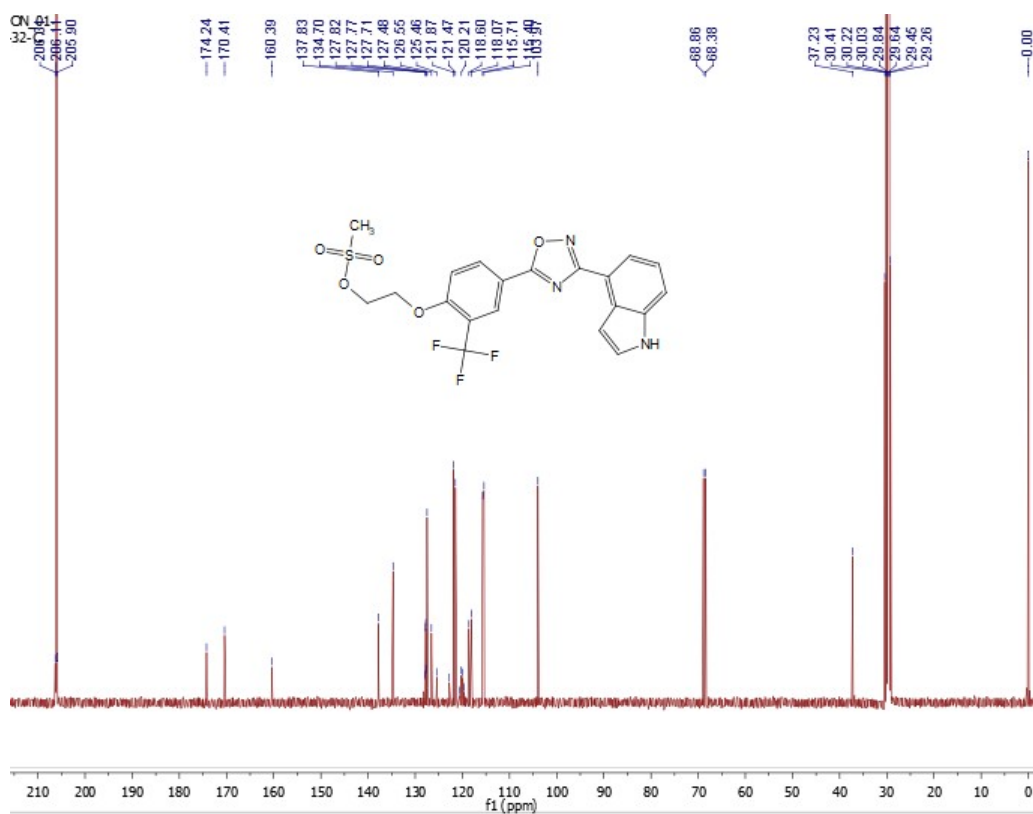

$^1\text{H}$  NMR and  $^{13}\text{C}$  NMR of **27**

Electronic Supplementary Information

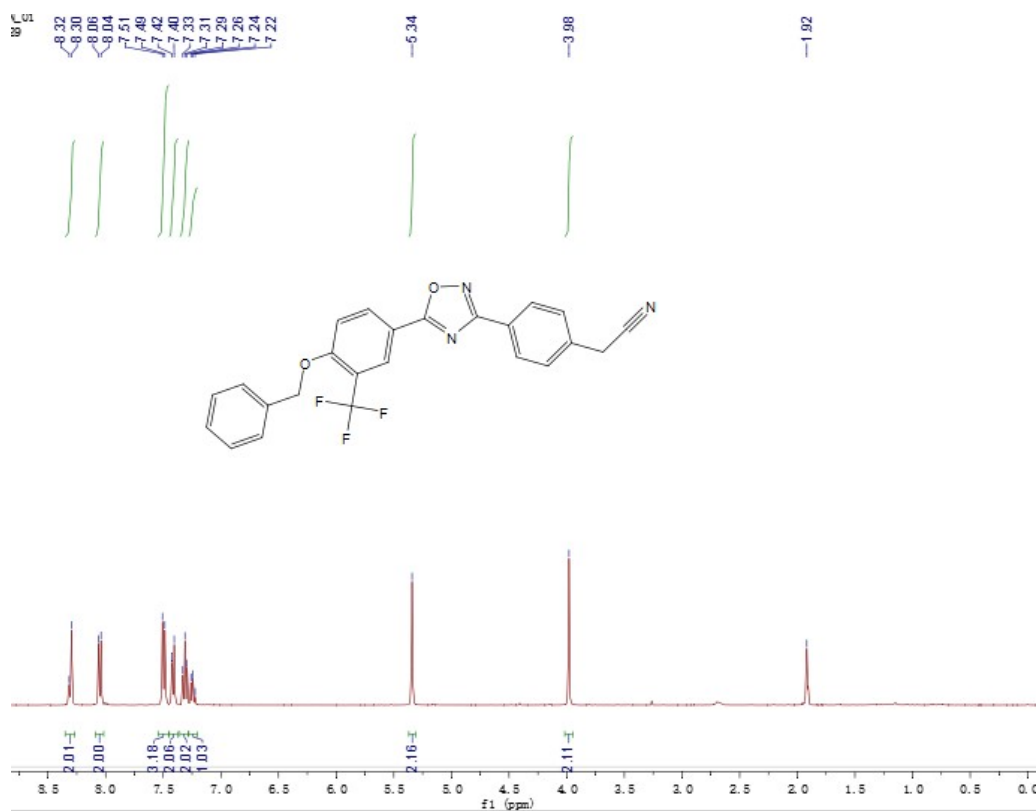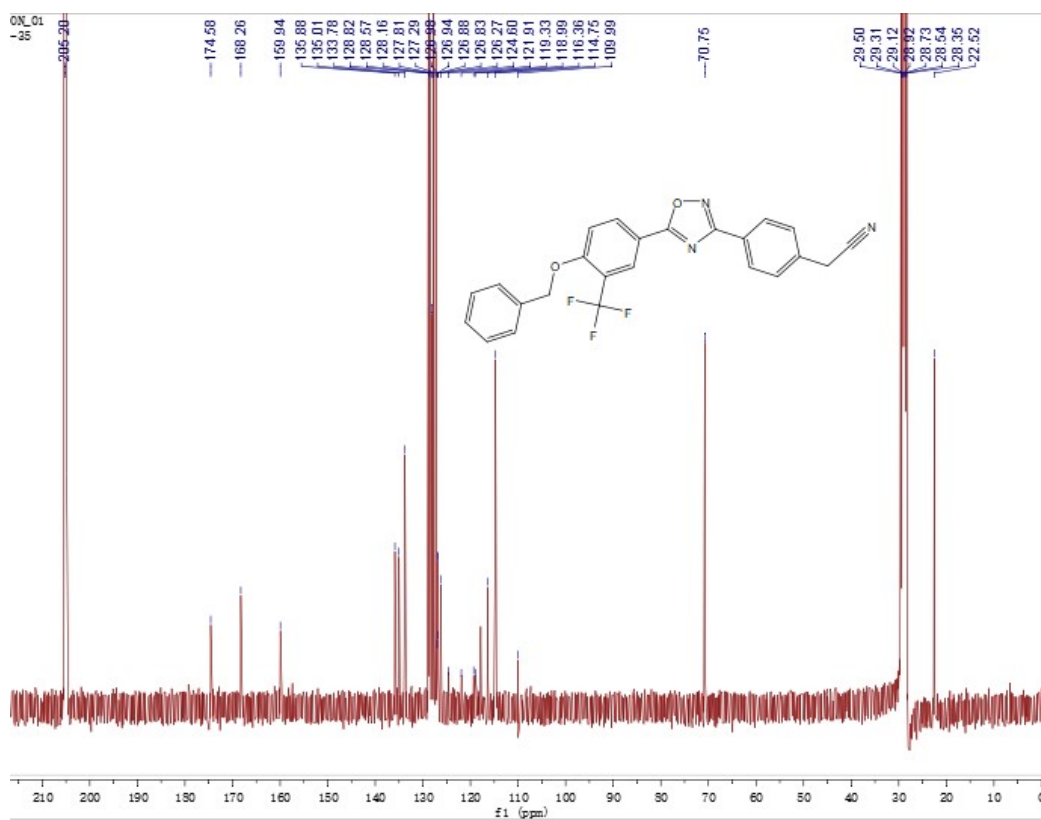

<sup>1</sup>H NMR and <sup>13</sup>C NMR of **30**

Electronic Supplementary Information

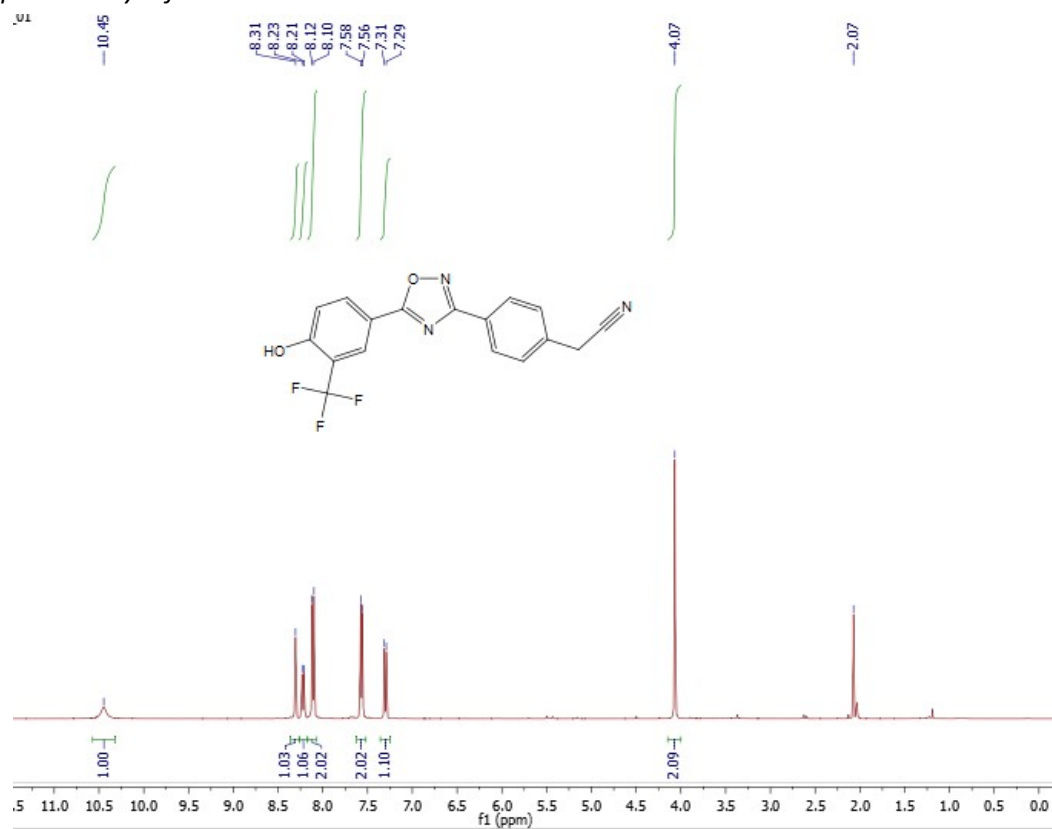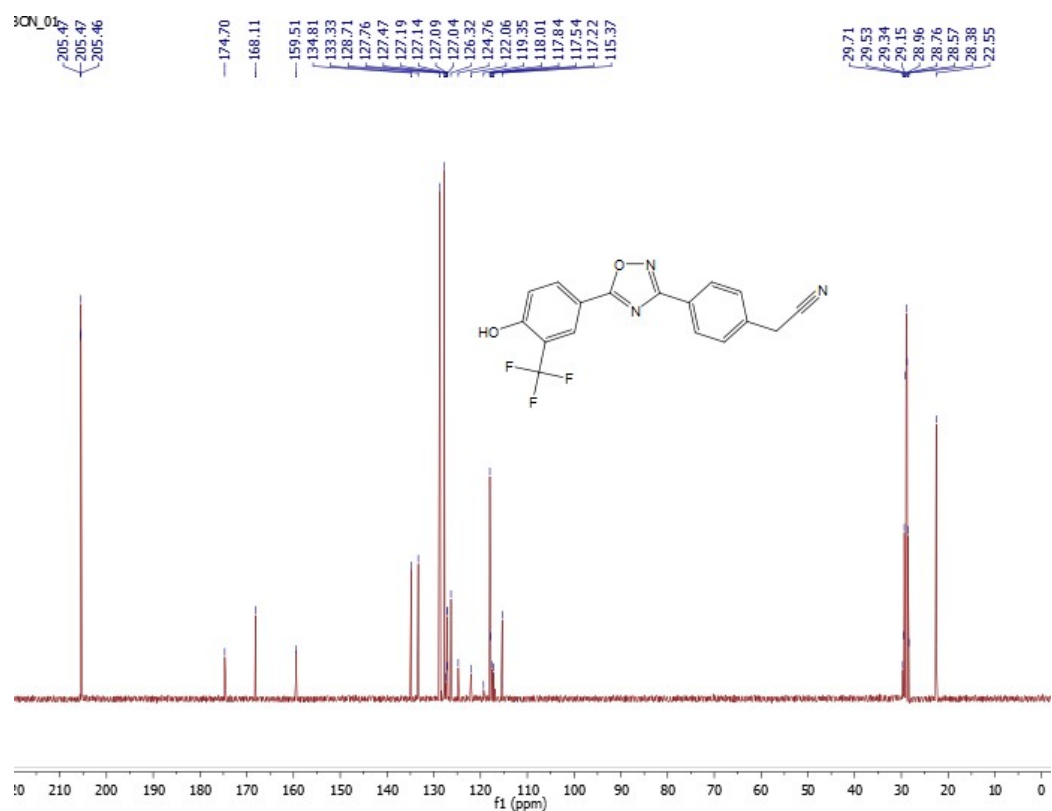

<sup>1</sup>H NMR and <sup>13</sup>C NMR of 31
